# Supplementary material
Source: PubMed Central journal article supplement (PMC3512143)
Supplement: 2a87ad56ccc08f0b8fa3e6406367f6e5_genetics.112.145409-2.pdf [file 2a87ad56ccc08f0b8fa3e6406367f6e5_genetics.112.145409-2.pdf]

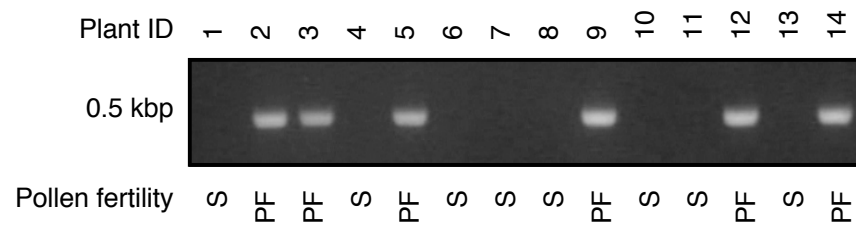

FIGURE S8.— Co-segregation analysis between the bialaphos-resistance gene and partial fertility. Agarose gel electrophoresis of PCR products resulting from amplification using primers targeting the bialaphos-resistance gene. Size of the amplicon is shown on the left. Plant ID and pollen fertility is shown above and below the photograph, respectively. PF and S indicate partial fertility and complete sterility, respectively.
