# Supplementary material
Source: PubMed Central journal article supplement (PMC3512143)
Supplement: 3a7d336f7d0a0da55cf9affbc2f43409_genetics.112.145409-14.pdf [file 3a7d336f7d0a0da55cf9affbc2f43409_genetics.112.145409-14.pdf]

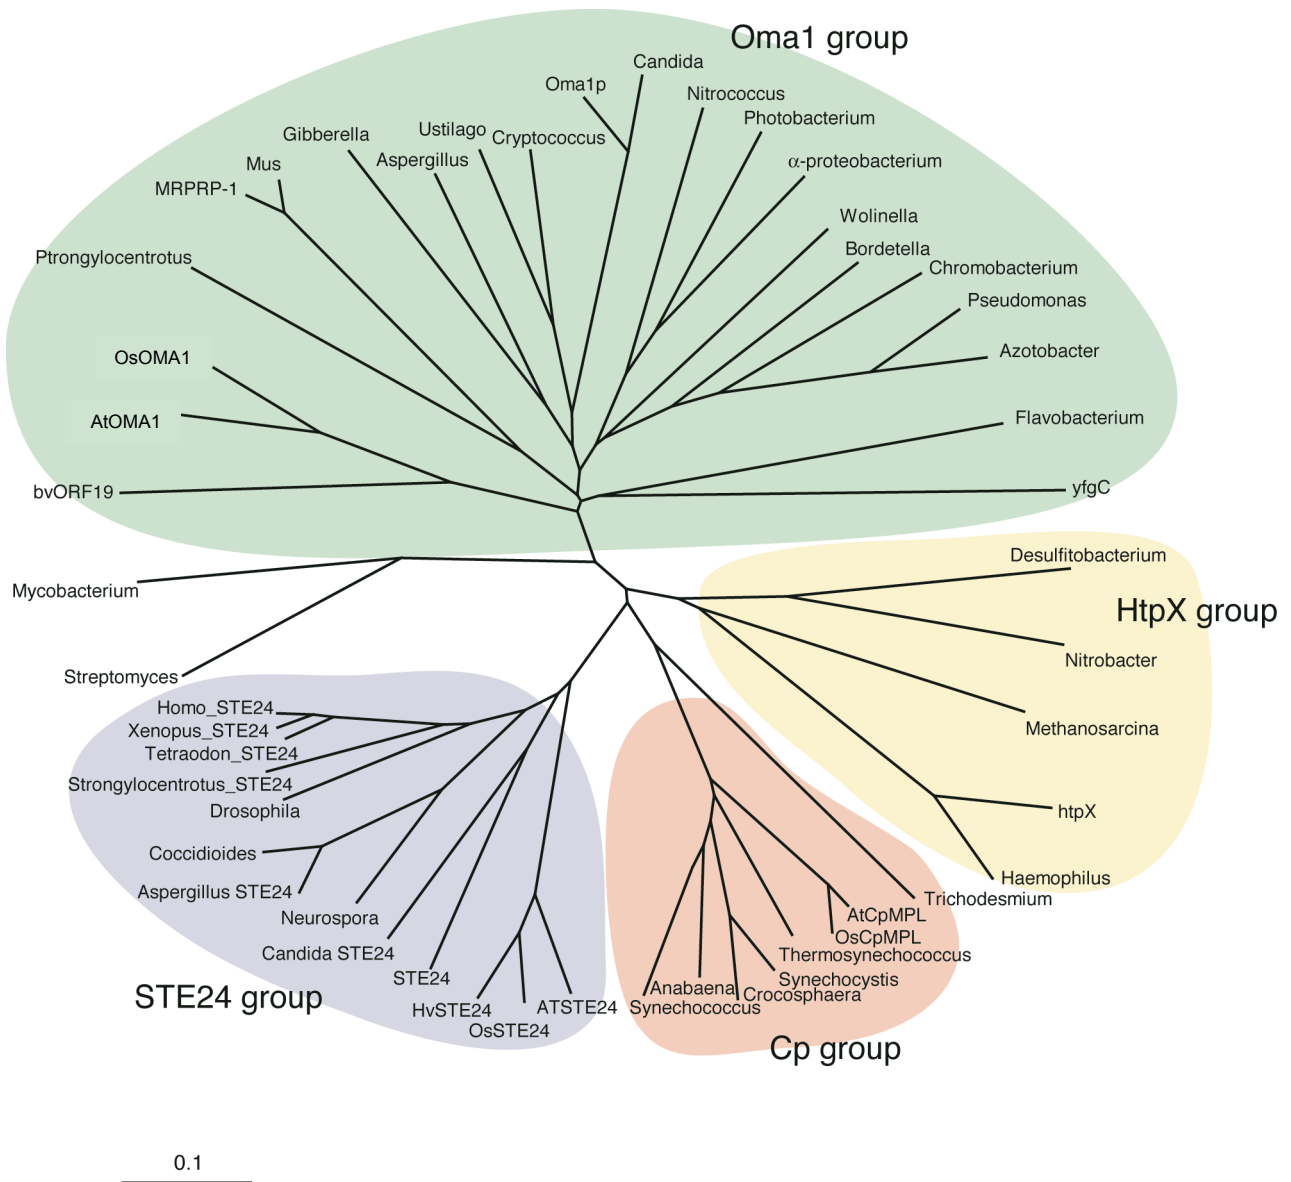

File S5. A Neighbor-Joining tree of peptidase M48 family proteins (see File S4). The tree was drawn by TreeView (<http://taxonomy.zoology.gla.ac.uk/rod/treeview.html>) based on the alignment shown in File S4. The sequence data are grouped into four clades. Note that bvORF19, as well as its homologous sequences in Arabidopsis, rice, and yeast OMA1 (see File S3), belongs to a single group, tentatively named the Oma1 group.
