# Supplementary material
Source: PubMed Central journal article supplement (PMC3512143)
Supplement: 6c3a32c5c6c8d2bd5c6370ebc1db3ff7_genetics.112.145409-13.pdf [file 6c3a32c5c6c8d2bd5c6370ebc1db3ff7_genetics.112.145409-13.pdf]

TABLE S1 Primers used in this study

| Purposes                                            | Name of primers     | Nucleotide sequences                     |
|-----------------------------------------------------|---------------------|------------------------------------------|
| cDNA sequencing of bvORF18/19/20/21                 | D-Fw                | 5'-TGCACCCAGTAGTTGTGCCA-3'               |
|                                                     | D-Rv                | 5'-GCAAGAGAGGATGCCTTAAG-3'               |
|                                                     | Gre                 | 5'-GATGCGCGATAATTGTAGCC-3'               |
| Generating hybridization probe of bvORF19 3' UTR    | 3'-FW               | 5'-AGCTTGCAAAGCCACTGGGCGA-3'             |
|                                                     | 3'-RV               | 5'-GGAACCAAATTAGATTGAATTAACAAGTGG-3'     |
| bvORF16-GFP construction                            | GFP-ORF16-FW        | 5'-CCGTGACATGAAATGGAGCTGCGTTG-3'         |
|                                                     | GFP-ORF16-RV        | 5'-GGCCATGGCAGATAGTTCTTTTCCAATTGG-3'     |
| bvORF20-GFP construction                            | GFP-ORF20-FW        | 5'-GGGTCGACATGGCATGGTACAGTAAATTC-3'      |
|                                                     | GFP-ORF20-RV        | 5'-GGCCATGGATTTTGCAGACCCAAATAACCC-3'     |
| Amplification of bvORF19 for transgene construction | attB1-ORF19 prom    | 5'-AAAAGCAGGCTTTAGATCTGCCGTTGCACAACG-3'  |
|                                                     | orf19-genomic 3' rv | 5'-AGAAAGCTGGGTGTATCTGGGACCTGGATTGAG-3'  |
| Amplification of bvORF20 for transgene construction | attB1-ORF20 prom    | 5'-AAAAGCAGGCTGTAACAGAGGGTTCAAATTGCGG-3' |
|                                                     | orf20-genomic3'rv   | 5'-AGAAAGCTGGGTGGTCCTGGATTGAGGGTTAAC-3'  |
| Amplification of bvORF21 for transgene construction | attB1-ORF21 prom    | 5'-AAAAGCAGGCTGAACCTGAACTGAACTTATTGG-3'  |
|                                                     | orf21-genomic3'rv   | 5'-AGAAAGCTGGGTTACCTGGGTCCCTGGATTAAG-3'  |
| Detection of bialaphos-resistance gene              | BAR5                | 5'-CGAGACAAGCACGGTCAACTTC-3'             |
|                                                     | BAR6                | 5'-AAACCCACGTCATGCCAGTTC-3'              |

| Name of ORFs      | Condition of amplification |           | Nucleotide sequences of primers | NK198   |   |        |   |       |   | C | Size of PCR products (bp) |
|-------------------|----------------------------|-----------|---------------------------------|---------|---|--------|---|-------|---|---|---------------------------|
|                   | Annealing (°C)             | Extension |                                 | Anthers |   | Leaves |   | Roots |   |   |                           |
|                   |                            |           |                                 | +       | - | +      | - | +     | - |   |                           |
| bvORF12           | 60                         | 1:00      | 5'-CTGATTTTGGACGGAGCTTGTTTCG-3' |         |   |        |   |       |   | / | 630                       |
|                   |                            |           | 5'-TGCATTGTAGAAACACCCGCGTAG-3'  |         |   |        |   |       |   |   |                           |
| bvORF13           | 62                         | 1:30      | 5'-CCAGGGACAGGGAAGACCAAGAC-3'   |         |   |        |   |       |   | / | 1100                      |
|                   |                            |           | 5'-AGTCCTCCTTTCCACCCGACAC-3'    |         |   |        |   |       |   |   |                           |
| bvORF14           | 56                         | 0:30      | 5'-ATCTCCACTTGAAGGGCCAG-3'      |         |   |        |   |       |   | / | 250                       |
|                   |                            |           | 5'-TTCTCGTCAGACGGACTGAG-3'      |         |   |        |   |       |   |   |                           |
| bvORF15           | 56                         | 0:30      | 5'-AGTTACCGTGGAGTTACTAGC-3'     |         |   |        |   |       |   | / | 300                       |
|                   |                            |           | 5'-AGCACAGACTCGTTGCCACT-3'      |         |   |        |   |       |   |   |                           |
| bvORF16           | 52                         | 0:30      | 5'-AACATCTCCCTAGCCTTCCT-3'      |         |   |        |   |       |   | / | 870                       |
|                   |                            |           | 5'-CTGAATTCGTTTGCGTATAGT-3'     |         |   |        |   |       |   |   |                           |
| bvORF17           | 56                         | 1:00      | 5'-CAAGACTTGGTTCAATCAGCC-3'     |         |   |        |   |       |   | / | 550                       |
|                   |                            |           | 5'-TTCTTTCTCGGCTTCAGCAGC-3'     |         |   |        |   |       |   |   |                           |
| bvORF18 /19/20/21 | 56                         | 0:30      | 5'-AAGGCATCCTCTCTTGCAAAA-3'     |         |   |        |   |       |   | / | 360                       |
|                   |                            |           | 5'-TGAATTGCACGTCCTGCTACA-3'     |         |   |        |   |       |   |   |                           |
| bvORF22           | 62                         | 1:30      | 5'-GTGGCTCTCTCTAAACCGGCTTGT-3'  |         |   |        |   |       |   | / | 1400                      |
|                   |                            |           | 5'-CATGTTTCAGCCCGACCCACGAA-3'   |         |   |        |   |       |   |   |                           |
| bvORF23           | 53                         | 0:30      | 5'-CTATTGCGTGATCTTTGTGTTAGAA-3' |         |   |        |   |       |   | / | 410                       |
|                   |                            |           | 3'                              |         |   |        |   |       |   |   |                           |
| bvORF24           | 56                         | 0:30      | 5'-TCGAATCTAACGCGGAGACA-3'      |         |   |        |   |       |   | / | 230                       |
|                   |                            |           | 5'-TGCAGAGGGAGTCAAGTCAG-3'      |         |   |        |   |       |   |   |                           |
| bvORF25           | 54                         | 0:30      | 5'-ACAGGATTCGCTGGCCTTAA-3'      |         |   |        |   |       |   | / | 240                       |
|                   |                            |           | 5'-TCAAATGGTCCTCACCAC-3'        |         |   |        |   |       |   |   |                           |

| Name of ORFs | Condition of amplification |           | Nucleotide sequences of primers | NK198   |   |        |   |       |   |   | Size of PCR products (bp) |
|--------------|----------------------------|-----------|---------------------------------|---------|---|--------|---|-------|---|---|---------------------------|
|              | Annealing (°C)             | Extension |                                 | Anthers |   | Leaves |   | Roots |   | C |                           |
|              |                            |           |                                 | +       | - | +      | - | +     | - |   |                           |
| bvORF26      | 56                         | 1:30      | 5'-GATGGAAGGTACATGCACAC-3'      |         |   |        |   |       |   |   | 100                       |
|              |                            |           | 5'-CAATGCCACGCCAACTTTCC-3'      |         |   |        |   |       |   |   |                           |
| bvORF27      | 56                         | 0:30      | 5'-AAGCGTCAGATCCTTAACCC-3'      |         |   |        |   |       |   |   | 260                       |
|              |                            |           | 5'-ACTATTGAGGAAGCTCTGCTGC-3'    |         |   |        |   |       |   |   |                           |
| bvORF28      | 52                         | 0:30      | 5'-CACCAATTTTAGGGGCTCTA-3'      |         |   |        |   |       |   |   | 120                       |
|              |                            |           | 5'-AAAAATCCAATCCAATAAGTCC-3'    |         |   |        |   |       |   |   |                           |
| bvORF29      | 56                         | 0:30      | 5'-TTCTCGAACCATATCCCACC-3'      |         |   |        |   |       |   |   | 150                       |
|              |                            |           | 5'-TGTGAAAGTCGAGAGCTAAGG-3'     |         |   |        |   |       |   |   |                           |
| bvORF30      | 56                         | 0:30      | 5'-ATATTAACCCACGGTCCGG-3'       |         |   |        |   |       |   |   | 430                       |
|              |                            |           | 5'-ATGAGACAGTCGTCCCATAG-3'      |         |   |        |   |       |   |   |                           |
| bvORF31      | 54                         | 1:00      | 5'-GGATCATACCTGAAGAGTGT-3'      |         |   |        |   |       |   |   | 570                       |
|              |                            |           | 5'-TAAGAAGACCATGCTCTTCC-3'      |         |   |        |   |       |   |   |                           |
| bvORF32      | 56                         | 0:30      | 5'-TTGAACTTCTAGACCTGGAGT-3'     |         |   |        |   |       |   |   | 500                       |
|              |                            |           | 5'-CACCGAGCTTCTTAAGTAGCATGT-3'  |         |   |        |   |       |   |   |                           |
| bvORF33      | 56                         | 0:30      | 5'-ACACTTCTTAGGGTGACGAAG-3'     |         |   |        |   |       |   |   | 170                       |
|              |                            |           | 5'-TGTTGAAGCAGTGTGGGGTG-3'      |         |   |        |   |       |   |   |                           |
| bvORF34      | 56                         | 1:00      | 5'-TGGCAAAGGGGTTTTGACAC-3'      |         |   |        |   |       |   |   | 560                       |
|              |                            |           | 5'-GCAATTCCAGGATCAACATAGCAC-3'  |         |   |        |   |       |   |   |                           |
| bvORF35      | 54                         | 0:30      | 5'-TCTGATGTATCCACATCATCG-3'     |         |   |        |   |       |   |   | 230                       |
|              |                            |           | 5'-ATTAGATGCATCACGGTCTGG-3'     |         |   |        |   |       |   |   |                           |

FIGURE S1.– RT-PCR analysis of 21 bvORFs. Names of target ORFs, annealing temperatures, extension times, nucleotide sequences of primers, and sizes of PCR products are shown. RNA samples were subjected to reverse transcription with (+) or without (-) reverse transcriptase. Integrity of the PCR reaction was confirmed by control experiments using genomic DNA as templates (C).

CACTTTTGAGCAACTCACAATTTTATATATACATTACAAGTAATTAATAAATAAAGTATTA 100440  
TATGGGTAACCTTATACATTGATAAGGGTAACCTAATAAGATAATTTGAGCAACTAATGTTT 100380  
TTATATGTACATAACAAGTAAATAATAACACACGTTACATTGACTTGATTACACAAAGGA 100320  
 TAACTTATACATTGATAAAGACAACCTAATAAGATAAGTTGAGCAACTAAAGATTTTACAT 100260  
TGACTTGGTTAGATAAAGGATAACTTATAGATAGATAAAGGTAACCTAATAAGATAATTTG 100200  
AGCAACTAACAATTTTATATATACATTACAAGTAATTAATAAATAAAGTAAAGTATTA 100140  
TATGGATAATTAATAAATAAAGTAAATAATTTATATAGAGGAACTATGCAAATTCCTACTA 100080  
 ATGTACATTGACTTGGTTTCAGTTAAACTTGTGGAACATGTAATCTTGTAATCCTAGTGG 100020  
 AGTAATCTATTTACTTTTAGATTAACCTAAGCATAGTTTGGGATGGCCTATATGATGTTA 99960  
 ATAAGACATCACAACCTAATCTCCAACGTTGTTTATATTAATGTGCATGTCATATGAAAAT 99900  
 GTCATAGACAAGTTCCAATAAGTCTAGATATGTCAAATTTTCAGTTTACTAAATTATTATT 99840  
 GATTTATGTTCTTGTGTTCCAGTAATCTACAATAGAATGGAAGATGAAGAATTTGCTCC 99780  
 AACTCCTTGCATTGATGCAACTCCAACCTCCTTGTGTTGATACAACCTCCAACCTAATGCTAC 99720  
 TCAAACCTCTAATGCTCAAACAACAAGATCCACATTCCTCCTCGTCCATGCTACACACC 99660  
 TAGAGGTTCAAAGAATGGATCCCTTGTGCCCCTCTGAGTTAAACCTACTGTGGGTAT 99600  
 R G S K E W I P C C P P E L K P T V G M  
  
 GCCTTTTGATTCTCTTGTGATGGTATTGAGTTTTATAAAGCTTATGCTCGGTTTTGTGG 99540  
 P F D S L V D G I E F Y K A Y A R F C G  
  
 TTTTGTGGAAAGATTGGCTACTGAGAAAAAAGATAAGGATGGTCATGTTTACTTGAAGTA 99480  
 F V E R L A T E K K D K D G H V Y L K Y  
  
 TATTTATTGTAATAACAAGGATTTAAAGAAGATGGTGAGAGTAAAGCAAAGAGTAAACC 99420  
 I Y C N K Q G F K E D G E S K A K S K P  
  
 TATAACATGCTCTAGTTCTCGTAAAGAAGTGTAATCGTGCTGGTTGTCAAGCAAGGAT 99360  
 I T C S S S R K R S V N R A G C Q A R I  
  
 AGGTTTGAGAAAACGTAGTGATGGAAAATTCATGGTATATCTTTTTTCATGAATCGCATAA 99300  
 G L R K R S D G K F M V Y L F H E S H N  
  
 CCATGTATTTGCCACTCCCAAAGCATGCATTTTCTTAAAAATTCCTCGAACTTGACTCT 99240  
 H V F A T P K S M H F L K N S R N L T L  
 TGCTCACAAGAAGTTTCATATTTGATAATTCAAGATTGAATGTTGGACCAAACAATCTTT 99180  
 A H K K F I F D N S R L N V G P N K S F  
  
 TAGATTGATAAAGAGCATGTAGGAGGATATGAGAATGTAGGGGCGTCATTGGTTGATTT 99120  
 R L I K E H V G G Y E N V G A S L V D F

TAAGAACTTCAGTCGAGATGTTAAAGCTTACATACAAGATGTTGATGCCGACATGTTTGT 99060  
 K N F S R D V K A Y I Q D V D A D M F V

AAATAATTTCAAAGAAAAGGCAACTAGTAGTGGTGGAGGGTTTTTCTTTGACTATTGTGG 99000  
 N N F K E K A T S S G G G F F F D Y C G  
 D

ATGAAAATCGACATTTGACTAGAGTTTTTTGGGCGGATGCCATTAGTAGGAAAAACTATT 98940  
 \*  
 E N R H L T R V F W A D A I S R K N Y S

CTCTTTTTGGTGATATGGTATCATTGATACAACCTTTTGATACCAATAAATATTGTATGG 98880  
 L F G D M V S F D T T F D T N K Y C M V

TTCTTGCCCCATTTACTGGAGTTGATCATCATGAAAATGTGTTACTTTTTGGTATGGGCC 98820  
 L A P F T G V D H H G K C V T F G M G L

TACTTGCAAAGGAAGATATAGAATCTTTCGTTTGGTTGTTTGAATGTTTTTTAAAAGCTA 98760  
 L A K E D I E S F V W L F E C F L K A M

TGGGTAATTGTCAACCTACTTGTCTCATTACTGATCAAGATGCAGCAATGAAACAAGCAA 98700  
 G N C Q P T C L I T D Q D A A M K Q A I

TTGAAAAAGTTTTCTTTAAGACAATTCATAGACTTTGCGTGTGGCATATCATGAAAAAAG 98640  
 E K V F F K T I H R L C V W H I M K K V

TGCCGGTAAAAGTAGGTCCAGATATGTGTAGAACAACGAAGTTTCTTGAGAAATTGAATG 98580  
 P V K V G P D M C R T T K F L E K L N A

CTGTTGTTTGGGATAGAGACCTTGAGCCAGATGAATTTGACAAAGGGTGAATTCTGTGA 98520  
 V V W D R D L E P D E F D K G W N S V M

TGCGTGAATTTGGCTTAGAAGATGATGGGTGGTTTACTGATATGTTTAAACATAAGACATA 98460  
 R E F G L E D D G W F T D M F N I R H M

TGTGGATCCCTTCTTACTTTTCGAAATCTTTTCATGGGTGGTATTTTGAGGTCCACACAGA 98400  
 W I P S Y F R N L F M G G I L R S T Q I

TTTCAGAGTCTGAGAACAACCTTTTCACTTTGTTTACAAATGCAAATCTTCTTCTAGTTG 98340  
 S E S E N N F F T L F T N A N L L L V E

AGTTATGGTTTTCGGATAGAATCAGCTATGGATGCTCAAAGACATGCCCAAAACAAACTCA 98280  
L W F R I E S A M D A Q R H A Q N K L N

ACTCAGATTCTAAGAATTCCATGCCTCGTCTTATTACTCCTCCTTTAGAGAAGCATG 98220  
S D S K N S M P R L I T P L P L E K H A

CATCTCTTGTTTACACACACAATATGTTCTACAAATTTAGAGAGAGTTTCAAATGCAA 98160  
S L V Y T H N M F Y K F Q R E F Q N A I

TTTTTAATTGTGGGGTTTACAAAGTACAAATAGAGGAAGCTGTTGAGGAGTTTGAAGTTG 98100  
F N C G V Y K V Q I E E A V E E F E V A

CAGATAATACAAGGAAGAAAACATATCATGTGACTTTTATTCTGATTCTCATGATTGTT 98040  
D N T R K K T Y H V T F I P D S H D C F

TTTGCTCTTGTAAGATGTTTGAATCCATGGGAATATTATGTCGGCATGTGCTTTTTGTGA 97980  
C S C K M F E S M G I L C R H V L F V I

TAAAAGGGAAGTTTTTACTGAAATTCAGAGCAACATATATTGCATCGGTGGACTAAAG 97920  
K G K F L T E I P E Q H I L H R W T K D

ATGCTTCAAAAAGCCCATTTTTCGACTTTTGTGAGGACTTTGATGGTATAGAAATAAATA 97860  
A S K K P I F D F C E D F D G I E I N K

AGAAGAAAAAGTTGTTGGGGATCTTTGGTCGAAATTCCTCTCATGTGTAAGCCTTGTTG 97800  
K K K V V G D L W S K F F S C V S L V E

AAAATAACACAGACCATCTTGAGTTATTATTGGAAAGGTTATCTGCTTTTGGAGGAGAAA 97740  
N N T D H L E L L L E R L S A F E E E M

TGAAACCTGGAAAAGAAAATGTTGAGCAACAATCTAAAGACAAGCATATTGAGTTGTTTCG 97680  
K P G K E N V E Q Q S K D K H I E L F V

TTGGTTCTAATATAGTATCAGGTGGTATACTTCTCCAAACAAGTCTTCAAACAAAGGAA 97620  
G S N I V S G G I L P P N K S S N K G S

GTGGTACGGGAAAGAGAAAAGAAAAGTGATCAAGAGATAGCCATTGAAGCAAGCAACAAAA 97560  
G T G K R K K S D Q E I A I E A S N K K

AGGAGAGACTGTGTAGATCATGTGGTCAACTTTCAACTCATGATAGTCGTAATTGTCTCTG 97500  
 E R L C R S C G Q L S T H D S R N C P D

ATAAAAAGAAAAACCTAGAATGAGGTAAGTTTAGAATAATATATTATTTATACATCACTA 97440  
 K K K N L E \*

TCAAATGAGAGTTTCTTTTCATTCATTTATTAATAAATTATTTATCACAATTTTTGTTTC 97380  
 TTTTGCAGTTACATGGAGGATTGTGATACATGGTGATGACAAGAATCATGATGATCAAAA 97320  
 GGGGAGCAAGCAGATTTTACATCACACTTTTTGGGGAATTTTTGTTTGGTTTTATAAAGT 97260  
 GTTACCTACAAAAAATAAAGTGTATGTGTTCAAAGGAGCTGGCAAACATTTAAAAATTAT 97200  
 GGATTATTCTTTTGAAACGATTTCACTTGAAGGATTTTGATGGCTTAAGCACACTTTTGC 97140  
 AGTCTATCTCAAAAATTGTAGGTTTTGTGAAACTATATTCCATGGACACTGCAATTGATA 97080  
 TTGTAATTGGAAAGAAGCTTGATTATTCTGTAAGTTTTGCAAGTTATAACTTTTTCTTCTT 97020  
 AGGTTGGAAAGAAGTAGATTTTGTAACTTTTTTTTTCTTTTACTATTTGAGGTGACTGGAA 96960  
 TCCACCTTTTTGTGTTACCTTTTAGTGCATTCTTTGACTAGGACACTGATTCATTGGTAA 96900  
 TTATTATGTAAAAACCCCTATAAACAGTTACTAAAAAGAAGTTATAGTCAACCATACATT 96840  
 TACGAGAGAGTATTAATCTTTTTAGTTTGATTTTATGTATTATTTTCAAATATCTTTTTA 96780  
 TATGTACATAACAAGTAAATAATTTACACAGTTACATTGACTTGATTACACAAAGGATAA 96720  
 CTTATACATTGATAAGGGTAACTAATAAGATAAGTTGAGCAACTAAAGATTTTACATTG 96660  
 ACTTGGTTAGCCAAAGGATAACTTATAGATAGATAAGGGTAAATAATATGATAATTTGAG 96600  
 CAACTAAACAATTTTATATATACATTACAAGTAATTAATAACAAGAAGTAAAGTATTATA 96540  
TGGATAACTTATAGATAGATAAGGGTAACTAATAAGATAATTTGAGCAACTAACAATTTT 96480  
ATATATACATTACAAGTAATTAATAACAAGAAGTAAAGTATTATATGGATAACTTATAC 96420  
ATTGATAAGGGTAACTAATAAGATAATTTGAGCAACTAACGATTTTATATGTACATAACA 96360  
AGTAAATAATAACACACGTTACATTGACTATCTCCTTTTCATCTTTATCAAATAAAAAATA 96300

FIGURE S2.– Nucleotide sequence of *bvMULE-1*. Numbers of nucleotide residues are coordinated with those of BAC clone 5A3. Two open reading frames that exhibit sequence homology to transposases are indicated with putative translation products. The 115-bp and 111-bp repeated sequences are indicated by single and double lines, respectively.

CTCATGACGTCAAGATCTCAAGTCTATAAAAAAAATTGTTTTAAATAAGTCAACCTTTG 11926  
 TGCTGTACGTCTTCTTATTTTGGAGTCTACCTTTTGGATTATTTCTGATTGAGTTAAGCTTG 11866  
 TATGTATGTTCTCTTCTATTGAGTTTTAATTTATTTATGACTTGTTTAGTAGGTTACTTA 11806  
 CTTACTTATGATACGTATTACAATGTCACTCTCGTCTGTTTGAGAAGAAATGACATTGTA 11746  
 ACACACATCATAAGTAGTCATTGCATTTGTAATAGCAATCTTAGGTAGAGAGAGAATGCC 11686  
  
 TAGAGAGAGAGAGAGAGAAAACTCTGGAGCGAGCGAAGAGAAGGAGAATGGACAATGGT 11626  
 M V  
 >ORF-A  
 AAGAAGGAGACACCCCCAAGCCAGTAAACCACAACCTAGAGCCTTGAGAACAGCCTTCAT 11566  
 R R R H P Q A S K P Q P R A L R T A F I  
 RNA recognition motif (pfam accession PF00076)  
 AGATTTCTTCTCTCCCAATATTGATACCCAAACAATCCACAACATATTCAGTAGATATGG 11506  
D F L P P N I D T Q T I H N I F S R Y G  
 TGATCTGGAGGACTTAGTGATACCAGCAAAACTCCGGAAAAACTGTGGGCACAAATACGC 11446  
D L E D L V I P A K L R K N C G H K Y A  
 ATTCATTAATTTTTTCTCCATGAATGCTTTACTCAATGCGATTAAGCAGGAGAATGGAAG 11386  
F I K F F S M N A L L N A I K Q E N G R  
 AAGAATGGGAAATTTTTTGGATGCGAGTTAACCTGCAAAATATGACAAACAAGACCCTCC 11326  
R M G N F L M R V N P A K Y D K Q D P P  
 CCATAAAAACCACTTTCCAAATCCTAAACCAAAATCACAGACAGCCTCAAAAAAACCCGGT 11266  
 H K N H F P N P K P N H R Q P Q K N P V  
 ACAATATCATCCAGCTTGGAGAGACCACCGATCGTATAAGGATGTCTCGAACCCAAACCA 11206  
 Q Y H P A W R D H R S Y K D V S N P N Q  
 AATACCAATCCACACTGATGTTCCACCAATCAATCCCTCAACCAAACCTAATACCCGGAA 11146  
 I P I H T D V P P I N P S T K P N T R K  
 ACCACCTCATCAAACGAATTTATCCTCTTACCTATAGAATCAATCATCCCTAACCAAAT 11086  
 P P H Q T N L S S S P I E S I I P N Q I  
 CCTTGAACCTCTCAGTACTGACATTGTGAAAGAAATGACAAAGCACCGTAGGATGAGTTC 11026  
 L E P L S T D I V K E M T K H R R M S S



TAGGGTCCTTGGGGAAGACACGGAGAGAATAAGGGACCAAGTGGAACTTGTGGAAGTAGA 10966  
R V L G E D T E R I R D Q V E L V E L E

GGGCGATCAGATTCTTGCCATCTCAGGGGAGAAAAATGAAGAGATCCTGGAGTTACTGGA 10906  
G D Q I L A I S G E K N E E I L E L L E

AAGAAGCGTTATAGCAGTCGCAAACCTTTCATCTCCATCCAAGATTATCCATGAGCATAT 10846  
R S V I A V A N S S S P S K I I H E H I

CTTGGCGGAAGGGGTTAACTATCTGAAGATTAAACCCCTTGGGGGAATGCTTCATCTTAT 10786  
L A E G V N Y L K I K P L G G M L H L I

CCAGTTCAATTCGGTTGAAGAAAAGGATGACATGATAAAAAGCAAATGGCTTGAACGATG 10726  
Q F N S V E E K D D M I K S K W L E R W

GTTCTGGAGCTAAGGGATGTGAATAACGCTAGCACGGCATTATGGAGGGAGATGTGGAT 10666  
F L E L R D V N N A S T A L W R E M W I

CACAATTTATGGAGTTCCATTGATCGCATGGAGTTATGAAAATTTTCAGAAAATTGGTTG 10606  
T I Y G V P L I A W S Y E N F Q K I G C

TATATTCGGGAGAGTGCTATCGGTGGAATATTCTCGCATGGATTACGCCAGAGTTCAGTT 10546  
I F G R V L S V E Y S R M D Y A R V Q L

AATCACAGATTGTCTCTTCAAAGTCAATAACCCCATAGTTTTTTTACGTGGAAGATAAACC 10486  
I T D C L F K V N N P I V F Y V E D K P

GTTTAAGATTTTTGTTACAGAAGACTTTGGTCTTGGTCCAAATCATGATCCTCCTGCAAG 10426  
F K I F V T E D F G L G P N H D P P A S

TAAAGGTATGCCAAATCCCCTCTTCCATAGATTAGATTCTGATAACTCGAATTCGGAATC 10366  
K G M P N P L F H R L D S D N S N S E S

CTCTGATAAAGATCCATTGGATGATGATGATCGTGATAGTGACGACTGGGATCCTCCGGG 10306  
S D K D P L D D D D R D S D D W D P P G

AGGGGAAAGGTCACCCCAAAAACCCCTCCCAAACCTCCGAGTTCAATGCATCGGGAAATAC 10246  
G E R S P Q K P L P N S E F N A S G N T

TCCAGGAATCTCGGACATTGGAGTTAATAATGAGACAATCATTACTTCGCCTACCAAAGC 10186  
P G I S D I G V N N E T I I T S P T K A

TAGTGCCAAGGTCTCTCCAATGCAAAACAAAAACCTCCCATATACCCTAAACCTCCCAA 10126  
S A K V S P N A K Q K P P I Y P K P P K

AACTCAACTGAACTTTAATACCCCCACCACGTTCCCCAAGTCTGCTTTGCATTGGGAACTT 10066  
T Q L N F N T P P R S P S L L C I G N L

AAATCAACAAAAGTCTCCTCCCAACCACTTGAACTCCAAAAAGCCCCACCTTCACCATC 10006  
N Q Q K S S S Q P L E L Q K A P P S P S

GAAAACCTTACCCTTCCCTCCAACAACGAAACTGGGCTCACCTTTTAGCCCTGATCCAAC 9946  
K T L P F P P T T K L G S P F S P D P T

CTTTAAATATAATAATCCCCCATCTCCCAAAATAATATAATCAGCCCAATAAGCCCATT 9886  
F K Y N N P P I S Q N N I I S P I S P L

GGTCCCCAACCTGCCCAAAATACACAAAACCTCCCTAGTTCTACAAGTCGAAACTCTCC 9826  
V P K P A Q N T Q N S P S S T S R N S P

TTTAAAGCCCAGCCTCAATGACCAAAGCTTTCCTTACTACAATCCTCTGATCCACACTGA 9766  
L K P S L N D Q S F P Y Y N P L I H T D

TAATTCCTTTGGCCCGCTACTAAGGAAAGCCCAATCAAAATCCCAAACTAAGACACTCTC 9706  
N S F G P L L R K A Q S K S Q T K T L S

ATCCTCTCCTTCGACGTCCAGCCCTTCTATCCCCCGGTTTTGAAGACTTCCTTCCTCC 9646  
S S P S T S S P S I P P G F E D F L P P

CCCTCTGAAAGCCCATCATGAAAAAGGAGATTACAAAAACGACTGAAGAAAAATAAAGC 9586  
P L K A H H E K R R L Q K R L K K N K A

CAAAAACCGCCTCTCCTCCTCCTCCTCCAATCCCCACCTCTTCCTCCCTCTCCCTCCCC 9526  
K N R L S S S S S N P P P L P P S P S P

AAACCCGAAAACATCTCATGAGAACACTGCCTCGGAAATTATTGAATTAGGCTTGCAACT 9466  
N P K T S H E N T A S E I I E L G L Q L

AGGAATGAAATTCAATGGTGAAC TATCAGATCTACAAGACAAAATTGTTGGAATTTTGTGTC 9406  
 G M K F N G E L S D L Q D K I V G I L S

ACGCCAGGAGCAGGACTGGCTTTCCAATGTATAAGTACATCTTATACTCTCAATAAATTG 9346  
 R Q E Q D W L S N V \*

TTCCATGTTAATCTCGTGAATGTCAGGGGCCTCGGAGCATGGCCTAAAAGAAATGTTCT 9286  
 CAAAAAGTTACTACTCCTTCATGACCCCATGATAGTATTCATCCAAGAATCCAAACTGGA 9226  
 ATGTATTCCTTCTAAATTGCAAAAATCAATTTGGTGTGATGATGACCTCAGCCTCTGTAT 9166  
 CAGTCCATCAAACGGATCCTCTGGAGGATTAATCTCCCTATGGAGACCCCTCAAATTTCA 9106  
 TCTGGTTTCCAGTAGAATCGAATCACAATGGATCGCAATGGAAGGAATGGTGGTGAGGGA 9046  
 M E G M V V R E  
 >ORF-B

AAATTTTCAATGCCTTCTCATAAATATTTATAACTCCTGTGATGCTTCGACTAGATCAGA 8986  
 N F Q C L L I N I Y N S C D A S T R S D  
 Endonuclease/exonuclease/phosphatase family (pfam accession PF03372)  
 CACATGGAACCATATAGAGGATTTTTGCAGAACTCACACTTACCTCTTCTAATAGCGGG 8926  
T W N H I E D F C R N S H L P L L I A G

GGATTTCAATGAGGTACTATCTTCCCAAGATCGAGGCAGCCGGATAATAGATGAAACTAG 8866  
D F N E V L S S Q D R G S R I I D E T S

TGCCGGAAAATTCAGGCAATTCATAACCAACCTTCATCTTACTGAAATCACACCCTCCAA 8806  
A G K F R Q F I T N L H L T E I T P S N

TGGATACTTTACATGGTTTtaggggtcaatcaaaatcaaagctggatagaattcttgcca 8746  
G Y F T W F R G Q S K S K L D R I L V Q

ACCAGATTGGATTCTGAAATTCTCATTCCCTTAATGCCTCCATCCTCAAAGGAGTATCTC 8686  
P D W I L K F S F L N A S I L K R S I S

GGATCATTGCCCTCTTGTACTGAAGTCGCAATCTAAGGACCGGGGACCGAAACCTTTTCA 8626  
D H C P L V L K S Q S K D R G P K P F R

ATTTCTTGACATGTGGCTCACCCACAAGGATTGCCTGATCCTTACTAGGAAAGTATGGGA 8566  
 F L D M W L T H K D C L I L T R K V W E

AGATTGGAAGGATTACAATTTAGAGAAGTTTAAAGCTGTCAGAAAAGAGTTGAAAGT 8506  
 D S K G F T I S E K F K A V R K E L K V

ATGGAACCAGTCAAAAATTTGGGAATCTAGAAACCAATATCTCTCAATTAGAAGACGAAAT 8446  
 W N Q S K F G N L E T N I S Q L E D E I

TCACAAATGGGATACTGTTGCCAACACGAGAAACCTATCGGTTGATGAACTGAGTCTCAG 8386  
 H K W D T V A N T R N L S V D E L S L R

ATCCAAGGCCCAACTGGATTTATGGGATTGGATCAAACGCAAGGAAATTCCTGGGCCCA 8326  
 S K A Q L D L W D W I K R K E I H W A Q

GAACTCTCGTATAAGTTGGTTGAAGTGTGGGGATAAGAACTCAAAGTTCTTCCATGCCTA 8266  
 N S R I S W L K C G D K N S K F F H A Y

TGCATCGATTAGAAGACGGAAGAATAATATCTCTTCCATCACGATCGATGGTGAGACCGT 8206  
 A S I R R R K N N I S S I T I D G E T V

CTGTGACCCGGAAAAAATCAAAGCCGAAGCCTCACTCTATTTCCAAAATCTGTTCTCAGA 8146  
 C D P E K I K A E A S L Y F Q N L F S E

AGAAACCTTTTCCAGACCAACTTTCTTGAACCTAGCCTTCAAAAAACTCTCATCAATACA 8086  
 E T F S R P T F L N L A F K K L S S I Q

ATCCTCGGACCTCACCAAACCTTTCTCACACTCTGAAATAGAAAAAGCAGTAGCATCATG 8026  
 S S D L T K P F S H S E I E K A V A S C

TAGCCCTTCAAAATCCCCTGGCCCGGATGGTTTCAATTTTAACTTCATAAAGTCTTCCTG 7966  
 S P S K S P G P D G F N F N F I K S S W

GGCAATCATCAAAGAAGACATTTTCTCACTTGTCAATGAATTCTGGCAGTCTGGAACACT 7906  
 A I I K E D I F S L V N E F W Q S G T L

ACCAAGGGGTAGTAATGTAGCGTTCATAGCGCTGATCGCCAAGGTGGAAGCCCCCTCAAA 7846  
 P R G S N V A F I A L I A K V E A P S N

CTTCAAGGACTTCCGACCCATCAGTATGGTCGGTAGCCTTTACAAGATAATTGCGAAGTT 7786  
 F K D F R P I S M V G S L Y K I I A K L

RNA-dependent DNA polymerase (pfam accession PF00078)

GCTTTCCTTCAGGCTGAAAAATGTTATGAACGATCTTATTGGGCCCAACAATCTTCTTT 7726  
 L S F R L K N V M N D L I G P Q Q S S F

TATTGAGGGGCGCCAGATCTTGGATAGTGTTTTAATCACTGGCGAGTTATTGGACTCATA 7666  
I E G R Q I L D S V L I T G E L L D S Y

CAAAAGTTCCAAGATGGGGGCGAGTAATGTTAAACTGGACTTCCACAAGGCCTTTGACAG 7606  
K S S K M G A V M L K L D F H K A F D S

TGTTTCCTGGTCTTTCTTGGATTGGACCATGGATCAAATGGGCTTCCCATTAACATGGCG 7546  
V S W S F L D W T M D Q M G F P L T W R

AAAATGGATCTCCTCCTGTGTCTCATCTGCAGCCGCATCTGTCTCCTAAATGGCTCTCC 7486  
K W I S S C V S S A A A S V L L N G S P

TTCGACTCCGTTCAAGCTCCAGAGGGGCTCCGTCAAGGAGACCCTCTCTCTCCCTTTCT 7426  
S T P F K L Q R G L R Q G D P L S P F L

CTTTGTGTTAGCAGCGGAAGTTTTGAATCTCATGATCAGAAAAGCCACAGAATTGAATAA 7366  
F V L A A E V L N L M I R K A T E L N K

ATGGTCAGGTATTGCTATTTGTAAATCGGGTCTATTCTAACTCATCTTCAATTTGCAGA 7306  
W S G I A I C K S G P I L T H L Q F A D

TGATACGATAGTATTCTCAACTCCGGATTTGAAGGCGCTCAATAACATCCATAAAACTCT 7246  
D T I V F S T P D L K A L N N I H K T L

CATCCTGTTCCAGCTATCCTCAGGCTTGAGATCAACTTCCACAAAAGTGAGATCCTTGG 7186  
I L F Q L S S G L Q I N F H K S E I L G

AATCAATACTCCTCAATCTTGGCTTAAAGAAGCGGCAAGGCAATTATTTTGCAGAGTTGG 7126  
I N T P Q S W L K E A A R Q L F C R V G

TAATTTCCCGATCACCTACCTGGGCCTTCCAATAGGTGGCAGTTCCGCGAGATTAGCAAC 7066  
N F P I T Y L G L P I G G S S A R L A T

ATGGGAACCTCTCTTGGAGAGAATGAGGAAGAAATTGGCCACATGGAAAGAGAAATTACT 7006  
W E P L L E R M R K K L A T W K E K L L

CTCGATTGGTGAAGACTCACTTTACTAAAAGCCTCACTCTCGAACCTGCCAATCTATTT 6946  
S I G G R L T L L K A S L S N L P I Y F

CATGTCCTTATATCCTATGCCACAAGGAGTTATAGAAAAAATTAATAAAATTCAGAGAAG 6886  
 M S L Y P M P Q G V I E K I N K I Q R S

CTTTCTTTGGAGTGGTGGTATGGATAAAAAGGGCTCTATCTATGGTGAAGTGGGAATATGT 6826  
 F L W S G G M D K R A L S M V K W E Y V

CCAGCTTCCAAAAGCGTTGGGAGGCTTAAATGTGAGTAACCTTCTGATTAGAAATTTGGG 6766  
 Q L P K A L G G L N V S N L L I R N L G

GCTCCTTTGTAAGTGGGTGTGGAGGTATTTTTTCAGAACCAGATTCGCTATGGAGACTATC 6706  
 L L C K W V W R Y F S E P D S L W R L S

AATTAAAGCCAAATATAAATACCAGGCGCAAATGAATATGGCTGACATTGCTCCAATAAG 6646  
 I K A K Y K Y Q A Q M N M A D I A P I R

ATCAGGTGGTCCCTTGGAGACATCTTTGCAACCATCTCCTAAAACACCAAGCAACAAATGA 6586  
 S G G P W R H L C N H L L K H Q A T N E

ACTTCTGAAACAAGGTACCAGGAAAAGAATAGGGAATGGGGAGAATACCTTATTTTGGCA 6526  
 L L K Q G T R K R I G N G E N T L F W H

TGACTCTTGGCTGGGCAATTTGCCTCTGAAATTAACCTTCCCAAGACTCTTCCTAATCTC 6466  
 D S W L G N L P L K L T F P R L F L I S

AGTTTTACCCATGGCTTCAGTAGCGGAGATGGGTTCTTGGGTGAATTTGGAATGGAAATG 6406  
 V L P M A S V A E M G S W V N L E W K W

GAATTTGCCATGGTCCAGAGAATTCAGAAAGAGAGACCGCATTGAATGGGAGCAGCTCCA 6346  
 N L P W S R E F R K R D R I E W E Q L Q

ACCTTCCCTCCAGCAAATCTCAGTCCGCCTCAATGAATCAGATGAGTTAATATGGAACCTT 6286  
 P S L Q Q I S V R L N E S D E L I W N F

TAGTATGGCTGGTAATTTCTCAGTTCGCTCCTTCTATGAAGAACTTCACAAGCGCTCGAA 6226  
 S M A G N F S V R S F Y E E L H K R S K

GCCCTGTCTAGAAAATCTCCCTCAAAGATATGGAAAGGACTTGTTCCCTTCCGAATAGA 6166  
 P C L E N L P Q K I W K G L V P F R I E

AATCTTCACTTGGTTATCAGTGCTAGAGAGAATCAATACTAAGAAGAACTAGCTTCTCT 6106  
 I F T W L S V L E R I N T K K K L A S L

GAACATTATCCCACCCGCTGAGGTGGGTTGCTCATTATGTAGTTTGGAGCCTGAGGATAT 6046  
 N I I P P A E V G C S L C S L E P E D I

TTCGCACCTCTTTTTGTTTTGCCCTTCTCAATGGAGATTTGGGCTTGGTGGTGGGACCT 5986  
 S H L F L F C P F S M E I W A W W W D L

TTGGAACCTATCTTGGGTATGGCCAAAATCTCTAAATCTTGCCCTCTCTCAATGGAATTG 5926  
 W N L S W V W P K S L N L A L S Q W N C

CCCAAGGAAGGAAAAATTATTCAAAAAATCTGGCTGGCAGCATTTCATTGTGATTATCTG 5866  
 P R K E K L F K K I W L A A F I V I I W

GTCAATCTGGAGAGAACGCAATGAGAGAATTTTCAATAAGAAAGAATCATCAGTTTCAGA 5806  
 S I W R E R N E R I F N K K E S S V S E

AATCAAAAACCTCATTCTTGTCCGTTTATGTTGGTGGATGAAGCCTTGGAACCTCTCCTT 5746  
 I K N L I L V R L C W W M K P W N L S F

CCCGTACACAATTGAAGAAGTCATCAGAATCCCACAATGTCTCTTATGGGGTAGCGCTGT 5686  
 P Y T I E E V I R I P Q C L L W G S A V

GCCTCGAAGAAGTAAAACCTCCCATCTCCCCCTCTAATTCAGCTCAGATCTAACCCCC 5626  
 P R R S K T S H L P P L I Q L R S N P P

TGACCCTTGTCTCAAGTGGATGGTGGGTTTCACCCCGTTCTCGCCAAAAGAAGGTGCTAG 5566  
 D P C L K W M V G F T P F S P K E G A R

AGCAGGAGGCATTTTTGGAGGCTTCCTCAGAGATGAAGTGGGTGTGATCTTATGCTCCTT 5506  
 A G G I F G G F L R D E V G V I L C S F

CTCCTGCCCTTTTCCGCCAATGGGTATTAATGAAGTTGCAGTGATTGCAATTCACCGAGC 5446  
 S C P F P P M G I N E V A V I A I H R A

TCTGCAAATCTCTCTCAGTGTGCAAATCTAAAAGACCGAGAAATCTCAATTTTCTCTGA 5386  
 L Q I S L S V Q N L K D R E I S I F S E

|                                                                       |      |
|-----------------------------------------------------------------------|------|
| ATCCAGCCAAGCTATCAGTTGGTGCCTCAATCTCTCATCTGGTCCGACTAATCTCTCCTT          | 5326 |
| S S Q A I S W C L N L S S G P T N L S F                               |      |
| CCTGTTGAACTTCATCAGATCTACATGCAAAAAGCTCCCTCTTCTGAAGTTTGATTATCT          | 5266 |
| L L N F I R S T C K K L P L L K F D Y L                               |      |
| CTCAAGCTGCTCAAGTCAAGTAAAACAGAATGCAATTGGAGAAATCTATGTTTTCTCAGA          | 5206 |
| S S C S S Q V K Q N A I G E I Y V F S D                               |      |
| TGTAGTTAGATGGAAAAAGTCTCCCATTTAATTTTGAACCGACCCCCTCCCATGGTATGA          | 5146 |
| V V R W K K S P I *                                                   |      |
| TGTAAGTGGCAGACGAAAGTACCCTTTTAAAAGGATTGTGAAATAAAATGATAAAAAAAAA         | 5086 |
| AAAAACACACATCATAAGTAACCGATTAAACAAGTCACAAATAGGTTAAAACCTCAATAGA         | 5026 |
| <u>AGAAAAACAGACATACAAACCTAACTCAACCAAGGATAATCAAAAAGGTAGATTTAAAATGA</u> | 4966 |
| <u>GAAAACGCGCAAAAATTGACTTATTTAAAACAATTTTCCAAAAAAAAAATGATATAAAC</u>    | 4906 |

FIGURE S3.– Nucleotide sequence of the *BNR-like* element identified in this study. Numbers of nucleotide residues are coordinated with those of BAC clone 33E19. Each pair of palindromic sequences is indicated by single, double, or dotted lines. Putative domains are boxed and shown with pfam descriptions.



TGAGTTTTTCATACTTCAGAACAGTGTGTAATATCCCAAATTTTTATACTATTTTTATAA 79114  
AATTAATTTTTGTTATAATAAGATTTTTATATATATATAAATTCTGAAAAATAAAGTAAAAATC 79054  
ATAATAAATCAGATTTTTATGAAACTGTTTTATGTATTAAATCAGATTTTTTTTTTAAAA 78994  
GAAATTTTCGAAATCAAAATTTTTGAAATTAATCAGATTTTTATCTTTTGAAGAAAAAAA 78934  
AATTGGAATTTGATTTTCAGATTTTTCGTCCAAAACGAAAAATAGAGAGAAAAGAAAATT 78874  
CTGAAATTATAATTTGAGTTGGTTTTGGAAAAGGATTAGATTTTTGTAAATACTTATCTT 78814  
TTAGTGAAACCCTAGATTTACATATATATATATATACCCCCAAAACACCAAAAAAATTCT 78754  
CACGTAATACACTTTCCTTCATCTTTTTGGTAAGTTTTAAATTTTCAGATCTAAAATCACCA 78694  
TTGTTGTGTTTGAAGGTTTCAACAAAAAAAAAAAAAACTTTTTAAAATCCGATGACTTGGT 78634  
CGGAGTCCGGCGTCGGTTTTCTTCTTCTTCTTCTTCTTCTGTTTTCTTCTTCTTCTTCT 78574  
TCTTCTTCTTCTTCTTCTTCTTCTTCTTCTTCTTCTTCTTCTTCTTCTTCTTCTTCTT 78514  
GCGTGCGATGCTTCACAGTACCTCCAAGATTTGATGTTTTTAAAATAAAAAAAGAAAAAA 78454  
AAAAAAGAAAAAGGAATTACATGTGCATTAAGTCCACGAGAGATTAGACTTACTGTAA 78394  
CATGAAAGTTGAAAAAAAATTTCAAGAAAAAATTTCCCTTTCAATCTGTGACGACGCTGTC 78334  
ACGTTTTTTTTCAAGTAAAAGCTTTTTAATTTTTTTTTCTTTTCAACCTTGGTTATTTAA 78274  
CTTTGTCAACTATTAAGTATTAACCTTGTAAGCTTTGATTAATTTTTCTTTCGGAATATT 78214  
ATATTAAGTGACTAACATTAGGTAATATTATTTGTTGTAGACGGAACTTCGTAGAAGGC 78154  
GATTTTTTAGTTGATATTGCTATACTTGGGACGCGTTTGAGGTAATTCACAATGTCCATCA 78094  
ACAACTAGAATCCCGTTAGGAATTGTATGTGCTATGTGTAATGCATGTGGTTATGTGATT 78034  
CTATATTTATGTTAGATGTATATTATGTGACAGGAATCGTATAGTACTTCTATGACTAA 77974  
AATTATTATTATTATTACTATAGTACTATTATCCCTGCGTATAATATATATATGTATCT 77914  
ACTGGTATTGTTGTTATGAATTTGGATTTATAATGTACCTAATTATAACCATCGTATTTAA 77854  
ATTATGCTAATATTGACAATGTACTTAATGGGTATAACTAGTGTGTTAATGATGTAGCGA 77794  
ACGGTATTATAAGTTGACATATATTGTAACCTCTATGAGGCTCTAATGATGGATATATTGG 77734  
TTACTACGAATTATGGACGTTGATTAGTATTAAGTGGCTAAGTTGTGAAAAATATTATTT 77674  
GAACTAAAGATGTTCCCTGCTAATGTAAATGTGATGTTTGTGATGTGTCACAACTTTTAAAA 77614  
TCTATTAATCACGTAAAGTGGAATTTAGGGGAATTATCCTGTGGATTTGGATCCTCCATA 77554  
GGTGATGAACAGTACTTGATTTTATTATGATACAACCTTTTATTGTCTTCTCCTAATAC 77494  
TATTGGTGCGCATTGCGGATACCCATTAGATTAGTGAGGGGTGTGCACACTAGGGACGCA 77434  
CTGCAAAACGATATTGGCCATTGCTCTTAATTTATTGGGTGACGACCCATGTTGAAGTAG 77374  
GTGGTTACTGGGATTAGTCCCGCCTACTGACGTTTCGATTCCCTCTAATAATTAATGT 77314  
GACGTTGTGTGCATCATATAAACTTGGAGTATATAAATTGATTAAGTGTGTTATGTACTT 77254  
GTTTGTATTACGTTATACTTGTCTGCATTGTATTATATTTGTATGTATGTTATAAAAAATT 77194  
ATTTTTAAAATACAACATTATTATTATTATTTTTACGGGATGGAGTTGTAATTACTTAGC 77134  
TTTCGCTAATTTTTGTGTTTTTGTTTTTCTTTGCTCTTTTCTTATTTATATTGTGCAGGT 77074  
TGGTGAAAGGGACTACGTTGCAGGAATGAGTGAATTTATAGTTTTTAAGTTCACCTAGGT 77014  
TAATAAACACTACAGTACTGCCATTTGAGATTGTTTAGTTTTGTTTTGGTATAAAGTAGA 76954  
CAACTCAGTTTGGTTTATTTTGGATTTTTGGTTTTGTGAGTAAAAATTTTTATTTCTAATAA 76894  
TTAGCCTTGCATTTATTTTGAACAATAGATGCGGCGGTAACACCCTAAAGGTTTGGTCAG 76834  
ATATTTTAATGAAAAGTGAATATTTTTATAAAGTTTTAGAACCAAAAGTTTTGGGGTGTTAC 76774

AAATTGGTATTCAGAGCTTAGGTTATAATAAATAAATATAAATTAGGAGTTAATAAAATT 76714  
TGTTAAATAATTAAGAGTCTAAGATTAATTAAGTAATAAGCATTAAAAATAAATTGTGAG 76654  
AGTGGGATCGAAAAGGGTTTATGTGCCTTAATGTGAAAGCACTTATTTTCAGGTGCTTATT 76594  
AATTGTTTCTTTTCGTTCTTGTATGTTTAGATGTTGTAAGTACAAGAAAATGTTGTGCTC 76534  
GGATGACCGACCATAGGATTTAGAGATTTATATTAAGGTCCGTATACGAAGTTATTTAGT 76474  
AGTATTGAAAATTCTCTAAGTTCCTATTTATGTGTTTTAATTATGAATCTTATTACTTGA 76414  
CTATTTGAGTTGATTAGAGTTTAAGTTCTTGTATAATTATTGCTTACTTGTCAAATTGA 76354  
TGTTATGTGGAAGCATGCAAAGTTGTCTTGAAATGTATGTTATGATGAAATATAGTTTG 76294  
GTTGAGTCATGAAATTTTCTTATGATGAAAGTTTGTATTGAGTAAATAAAACGATGTGCA 76234

AGACCATGTATGGGTGAATAGATGTAGTAATACCAATGCTGATGTGCAGGAATTGTATGC 76174  
M L M C R N C M Q

AAACCTATCAAGTATACACTAGATCTCGTAGGAGGACTTTTGAACAAATGGCTGAAACCC 76114  
T Y Q V Y T R S R R R T F E Q M A E T P

CTGAACAACACTACTTGAGAGATTGAGATCTCTTGAACAACCTTTGCAACGTATGGGTTTAG 76054  
E Q L L E R L R S L E Q L S Q R M G L V

TGTTACAAAACCAATTAGGAAATAATGGTGGAGAGGACCCACAAGCTGCTATGGCAAAGA 75994  
L Q N Q L G N N G G E D P Q A A M A K K

AGTTAGCAACCCTTAAACCTCCAATCTTTGTAGGAAAGGAAGACCCCTTACTCTTAGAGA 75934  
L A T L K P P I F V G K E D P L L L E N

ACTGGCTAAGAGACTTTGATAAGTTATTTCACTGCTACTGGGACACCTGAAGCTCAAAAAG 75874  
W L R D F D K L F T A T G T P E A Q K V

TAGACCAAGCTACCTTTTATCTGAGGGAGGATGCAGACACTTGGTGGGAGAGTCAAGGAC 75814  
D Q A T F Y L R E D A D T W W E S Q G P

Retrotransposon gag protein (pfam accession PF03732)

CTATTGTTAGAGCTCAGGAAAACCTTTAATTGGAATGCTTTTAAGGTTGCTATTAAGGATA 75754  
I V R A Q E N F N W N A F K V A I K D R

GATTTTTCCCTGAACATATTTAGGAGGCAGAAATACAATGAGTTCACTAGATTTAACCAGG 75694  
F F P E H I R R Q K Y N E F T R F N Q G

GAGGTACTATGTCTGTGCAAGAGTATGCCAAAAGTTCAATGAGTTAGCTAGATTTTGCC 75634  
G T M S V Q E Y A Q K F N E L A R F C P

CTAATGTTGTGCCAGATGAGAGAGCTAAGGCTCAAAAGTTTGAGGATGGTTTAGCATTTA 75574

N V V P D E R A K A Q K F E D G L A F R

GAATTCAGACCAGACTTGGGGGAGCAACTTCTGCAACTTTTCAGGAAGCTTATGCTAAGG 75514

I Q T R L G G A T S A T F Q E A Y A K A

CTTCTAATATTGAGAGGATTTTGAGGCGTGAAGAGGAAGTTATGGGGAGGAATAAGAGAA 75454

S N I E R I L R R E E E V M G R N K R K

AAGACCCACCTAGCAACCAAAATGACCATGGAAATGACAAGAAACCTCGATATGGGGGTA 75394

D P P S N Q N D H G N D K K P R Y G G N

ACAATAATAATGGGGGCAATAATCACACTAATGGTGGTGGTAATTATCAAGGGAATCGTA 75334

N N N G G N N H T N G G G N Y Q G N R S

GCAACTACCAAGGTCAGGGGAGATCAAACCAGCAAGGATCCCGTACCCAGAACCCTACTT 75274

N Y Q G Q G R S N Q Q G S R T Q N P T C

GTAGAAAGTGTAACAAAAGCCACCCAGGATTTACCTGTCAAGGAGACCCAATAACTTGTT 75214

R K C N K S H P G F T C Q G D P I T C Y

Zinc knuckle (pfam accession PF00098)

ATGCTTGTGGAGAGAAAGGGCATAAGGCTAATCAGTGTCCCAAGCGTCAGAATAATGGAC 75154

A C G E K G H K A N Q C P K R Q N N G Q

AAAATGGAAACAATGGGGGAAATAGGAATGGTCATGGGCCTAATCAGAACCAGAATAACA 75094

N G N N G G N R N G H G P N Q N Q N N N

ATAACCGTCCCTACAACAACAACAACCTCTCAAGGTCAAACCTTCGAATGCTCAAGGGGGGA 75034

N R P Y N N N N S Q G Q T S N A Q G G N

ACAATACTCAGCATAATGGTCAGAATAACAATCGAGCAAATGGAGGAAACAACAATCAGA 74974

N T Q H N G Q N N N R A N G G N N N Q N

ACGGCAATGGAAATGGTGCTCGAGGCAACAATGGAAGAATCTATGTTATGAACCAGAATG 74914

G N G N G A R G N N G R I Y V M N Q N E

Retroviral aspartyl protease (pfam accession PF08284)

AAGCAGACACCAACGCCAATGTTGTGACGGGTACTTTCCCTCGTAAACTCTAACCTGCTT 74854

A D T N A N V V T G T F L V N S N P A Y

ACTTGCTTTTTGATTCTGGGGCGTCTCATTCTTTTCATAGCTAGTTCATTTGTTGAAAAGT 74794  
 L L F D S G A S H S F I A S S F V E K L

TAGGTCTAAAACCTCAATCTTGTGTCAAACCTTTTCATTACAATACCTTCAGGAGAAGTAG 74734  
 G L K P S I L C Q T F I T I P S G E V V

TTCCTTGTAGTTCTCTATACCAAGACATACCCATTACCATATTAGGATCTGATTTGCCGG 74674  
 P C S S L Y Q D I P I T I L G S D L P A

CTGATCTTATTCAGTTTGACCTACCCGACTTTGATGTAATATTGGGAATGGATTGGCTTG 74614  
 D L I Q F D L P D F D V I L G M D W L A

CTAAGTATAGAGCTAGGATAGAGTGCATACTCAAAGGTGTCTCTTAGGGGGCCAAAGG 74554  
 K Y R A R I E C H T Q K V S L R G P K G

GAAATAGAATATCCTATCAAGGAATTGTTTCTAAACCTGGAGTCAGTATTGTGTCAGCCA 74494  
 N R I S Y Q G I V S K P G V S I V S A M

TGTCAATCAAACCTATATTAGGAAGGGCTACCCCATATACTTGTGCCATGTGAAGGATG 74434  
 S F K T Y I R K G Y P I Y L C H V K D V

TGAGTGTGGAGGATGGAGAGATATCTCAAATACCTGTGGTGAGTGAGTTCCAAGATGTTT 74374  
 S V E D G E I S Q I P V V S E F Q D V F

TTCCAGAAGAAATTCCAGGGATGCCGCCAGTGAGAGAAATGGATTTTAAGATTGACCTAG 74314  
 P E E I P G M P P V R E M D F K I D L V

TGCCTGGAACCTGGAGCTATTTCTAAGGCACCATATAGGATGGCACCTGCAGAGATGCAAG 74254  
 P G T G A I S K A P Y R M A P A E M Q E

AGTTGAAAGTGCAATTGGAGGAATTATTGGAGAAAGGGTACATTAGGCCAAGTGTTCAC 74194  
 L K V Q L E E L L E K G Y I R P S V S P

CTTGGGGAGCACCAGTGTTATTTGTTTCGAAAGAAGGATGGAACCTTGAGGTTGTGTATTG 74134  
 W G A P V L F V R K K D G T L R L C I D

RNA-dependent DNA polymerase (pfam accession PF00078)

ATTACAGAGAGTTGAATAATGTCACAATAAAGAATAAGTACCCATTGCCTAGGATTGAGG 74074  
 Y R E L N N V T I K N K Y P L P R I E D

ATTTATTTGATCAACTTAAGGGTGCTGGAATTTTCTCTAAGATTGATTTGAGGTCTGGGT 74014

L F D Q L K G A G I F S K I D L R S G Y

ATCACCAATTGAGAATTTTCGGAGGAAGATATACCAAAAAACAGCTTTTTCGTACGAGGTATG 73954

H Q L R I S E E D I P K T A F R T R Y G

GGCATTATGAGTTCACAGTGATGCCATTTGGACTTACTAATGCACCTGCAGCATTATGG 73894

H Y E F T V M P F G L T N A P A A F M D

ATCTTATGAATAGAACATTTTCAGCCGTATTTAGATAGATTTGTGGTGGTGTTCATAGATG 73834

L M N R T F Q P Y L D R F V V V F I D D

ATATATTGGTGTATTCGAAGGATAAAGAAGAGCATGAAGGTCATTTAAGGAAAGTTTTGG 73774

I L V Y S K D K E E H E G H L R K V L E

AGATACTTCGAGAGAAAAGGTTGTATGCTAAGTTATCAAAATGTGAGTTTTGGCTTGAGA 73714

I L R E K R L Y A K L S K C E F W L E K

AAGTTGCATTTTTAGGTCATGTGATTTTCGAAGGAAGGTGTTGCTGTAGATCCATCAAAGA 73654

V A F L G H V I S K E G V A V D P S K I

TACAAGCAGTAACAGAATGGGTGAGACCTAGTAATGTGACTGAGATTAGAAGTTTCTTAG 73594

Q A V T E W V R P S N V T E I R S F L G

GACTTGCTGGCTACTATAGGAGGTTTGTGCAAGATTTCTCAAAAAGTAGCTCAACCTTTGA 73534

L A G Y Y R R F V Q D F S K V A Q P L T

CAAATTTGATGAAGAAAACAACCTCGATTTTCAGTGGGATGAGAGGTGTGAGAAAGCTTTTC 73474

N L M K K T T R F Q W D E R C E K A F Q

AGGAATTGAAGCAAAGACTTACTTCAGCACCAGTTTTGACATTACCATCTGGATTAGAAG 73414

E L K Q R L T S A P V L T L P S G L E G

GTTTTGAGGTGTATAGTGACGCTTCTAAGAATGGGTTAGGATGTGTATTGATGCAACATA 73354

F E V Y S D A S K N G L G C V L M Q H S

GTAAGGTGGTAGCATATGCTTCGAGACAACCTTAAGCCTTATGAACAGAATTACCCTACTC 73294

K V V A Y A S R Q L K P Y E Q N Y P T H

ATGATTTAGAGTTAGCTGCTGTAGTATTCGCATTGAAAATTTGGAGGCATTATTTGTATG 73234  
 D L E L A A V V F A L K I W R H Y L Y G

GTGTGTCATGTAAGATTTTCACTGATCATAAAAAGTCTGAAATATATATTTACTCAGAAGG 73174  
 V S C K I F T D H K S L K Y I F T Q K E

AGTTGAACATGAGACAGAGGAGATGGCTTGAACCTTATTAAGGATTATGATTTAGAGATTT 73114  
 L N M R Q R R W L E L I K D Y D L E I L

TGTATCATGAGGGTAAAGCGAATAAAGTTGCTGATGCATTGAGTAGGAAGACTAGTCATT 73054  
 Y H E G K A N K V A D A L S R K T S H S

CGATGAACATGATGGTGTATCTGAGAGATTGTGTGAAGATTTTCAGGAGCATGAGTTTAG 72994  
 M N M M V L S E R L C E D F R S M S L E

AAGTCATGGAGCAAGGGCAAGTGAAGCTCAATTGAATGCACTATGCGTGCAACCCACCT 72934  
 V M E Q G Q V E A Q L N A L C V Q P T L

TATTCGATGAGATTCGAGAGAAGCAAAGTAGTGATGAGTGGATGGTGAAGATAAAGAAAA 72874  
 F D E I R E K Q S S D E W M V K I K K M

TGAAAGAAGATGGAGTTGTCATCGAGTTTGACATTGATGAAAATGGTGTGTGAAGTACA 72814  
 K E D G V V I E F D I D E N G V V K Y K

AGGGAAGATGGTGTGTTCCCTAAGGATGAGGAGTTAAAAAGAAAGATTTTGGGAAGAAGCTC 72754  
 G R W C V P K D E E L K R K I L E E A H

ATAATACTCCATATTCTGTGCATCCTGGAGGAGATAAACTTTATAAGGATTTGAAGCAGC 72694  
 N T P Y S V H P G G D K L Y K D L K Q H

ATTTTTGGTGGAAAAACATGAAACGTGAAGTGGCAGAGTTTGTGCAAAGTGTGTTGACGT 72634  
 F W W K N M K R E V A E F V A K C L T C

GTCAGAAAGTGAAGATTCAGCATATGAGACCTGGTGAAGTGAATGATGCAACCTTTAGAAGTGC 72574  
 Q K V K I Q H M R P G G M M Q P L E V P

Integrase core domain (pfam accession PF00665)

CGAGTTGGAATGGGAGTCTATTTCAATGGATTTTGTGATGGGATTACCACTTACTAAGT 72514  
S W K W E S I S M D F V M G L P L T K S

CAGCTAAGAATGCCATATGGGTTATAGTGGATCGATTGACAAAGTCGGCCAGATTTATAG 72454

A K N A I W V I V D R L T K S A R F I A

CAATGAAGGATACATGGAGTATGCAACAGTTGGCTAGTGCATATGTGCGAGAGGTTGTTA 72394

M K D T W S M Q Q L A S A Y V R E V V R

GACTGCATGGAATACCAAAGGATATCGTTTTAGATAGAGACTCGAGATTTTTGTCCAAGT 72334

L H G I P K D I V S D R D S R F L S K F

TTTGGGGGAGGTTACAACAAGCCTTTGGGACATTGCTCAAATTTAGTACAGCTTTCCACC 72274

W G R L Q Q A F G T L L K F S T A F H P

CTGCAACAGATGGACAGACAGAGAGAACAATTCAAACATTGGAGGATATGTTGAGAGCAT 72214

A T D G Q T E R T I Q T L E D M L R A C

GTGTGATAGACTTTGGAGGATCTTGGGATGATTATTTGCCAACTATAGAGTTTTCGTATA 72154

V I D F G G S W D D Y L P T I E F S Y N

ACAACAGTTATCACTCAAGCATAAAGATGGCACCGTATGAAGCATTGTATGGGCGAAAAT 72094

N S Y H S S I K M A P Y E A L Y G R K C

GTAGGAGTCCTTTGTGTTGGAGTGACATAAGTGAGACGATGACTTTAGGGCCTGAGATGA 72034

R S P L C W S D I S E T M T L G P E M I

TTGAAGAAACAACGAAACAAGTTAGGCTTATTCAGGAGCACATGAGGGCAGCTCAAGATA 71974

E E T T K Q V R L I Q E H M R A A Q D R

GACAAAAGGCTTACGCAGATCAGAATAGAAGGGAGATGGAATTTGAGGTTGGGGAGAAGG 71914

Q K A Y A D Q N R R E M E F E V G E K A

CTTTGCTAAAAGTGTACCAACAAGGGGGTCATGAGATTTGGTAGGAAAGGAAAGTTGA 71854

L L K V S P T K G V M R F G R K G K L S

GTCCACGTTACATTGGACCATATGAGATCTTGAACGAATTGGGAAAGTAGCCTATAGAT 71794

P R Y I G P Y E I L E R I G K V A Y R L

TAGCCTTACCAATGGAGTTAGCTAATGTCCATAACGTCTTTCATGTGTCTCAACTTCGAA 71734

A L P M E L A N V H N V F H V S Q L R K

AATATGTCCATGATCCTACCCATATCATTCAACCTGAAACCATTGAACTAGATGAAACCT 71674  
Y V H D P T H I I Q P E T I E L D E T L

TATCCTTTGAGCAACGCCAGTTAGGATTCTTGATACCAAAACGAGAAGTACCCGGAACA 71614  
S F E Q R P V R I L D T K T R S T R N K  
Chromo domain (pfam accession PF00385)

AGGCGGTAAAACCTAGTCAAGGTGTTATGGTCAAGTCAAACCTTCTGAAGAGGCTACTTGGG 71554  
A V K L V K V L W S S Q T S E E A T W E

AAGCCGAAGATGATATGAAAAACCGATATCCCGAACCTTCCAGCAGGTACGCTTGAGTT 71494  
A E D D M K N R Y P E L S Q Q V R L S F

TCGGGGACGAAACTCTTTAAGGGGGGTAGAATGTGATACTAACTTTTTGTTTGTATATTA 71434  
G D E T L \*

GTAGCGAGCGATAACGTTAAAGTTCGAGGACGAACTTTCTTTTAAGGGAGAGTAGATGTA 71374  
ATATCCCAAATTTTTATAACTATTTTTATAAAATTAATTTTTGTTATAATAAGATTTTTATAT 71314  
ATATATAATTCTGAAAAATAAAGTAAATCATAATAAATCAGATTTTTATGAACTGTTT 71254  
TTATGTATTAATCAGATTTTTTTTTTAAAGAAATTTTCGAAATCAAAATTTTGAAATTA 71194  
ATCAGATTTTTATCTTTTGAAGAAAAAAAAAATTGGAATTTGATTTTCAGATTTTTCGTC 71134  
CAAAACGAAAAATAGAGAGAAAAAGAAATTTCTGAAATTTATAATTTGAGTTGGTTTTGGAA 71074  
AAGGATTAGATTTTTGTAAATACTTATCTTTTAGTGAAACCCTAGATTTACATATATATA 71014  
TATATACCCCCAAAAACACCAAAAAAATTTCTCACGTAATACACTTTCTTCATCTTTTTGGT 70954  
AAGTTTTAAATTTTCAGATCTAAATCACCATTGTTGTGTTTGAAGGTTTCAACAAAAAAA 70894  
AAAAAACTTTTTAAATCCGATGACTTGGTCGGAGTCCGGCGTCGGTTTTCTTCTTCTCT 70834  
TCTTCTTCTGTTTTCTTCTTCTTCTTCTTCTTCTTCTTCTTCTTCTTCTTCTTCTTCT 70774  
TCCTTCTTCTTCTTCTTATTTTCAATTTGGCTTTGCGTGCGATGCTTTCACAGTACCTCCAAGAT 70714  
TTGATGTTTTTAAAAATAAAAAAGAAAAAAAAAAAAAAAAAGAAAAGGAATTACATGTGCATT 70654  
AAAGTCCACGAGAGATTAGACTTACTGTAACATGAAAGTTGAAAAAAAAAATTTCAAGAAAA 70594  
AATTTCTTTCAATCTGTGACGACGCTGTACGTTTTTTTTTCAAGTAAAAGCTTTTTAAT 70534  
TTTTTTTTCTTTTCAACCTTGGTTATTTAACTTTGTCAACTATTAAGTATTAACCTTGTA 70474  
AGCTTTGATTAATTTTTCTTTCGGAATATTATATTAAGTGACTAACATTAGGTAATATTA 70414  
TTTGTTGTAGACGGAACTTCGTAGAAGGCGATTTTTTAGTTGATATTGCTATACTTGGGA 70354  
CGCGTTGAGGTAATTCACAATGTCCATCAACAAGTAAATCCCCTTAGGAATTGTATGT 70294  
GCTATGTGTAATGCATGTGGTTATGTGATTCTATATTTATGTTAGATGTATATTATGTGA 70234  
CAGGAATCGTATAGTACTTTCTATGACTAAAATTTATTATTATTATTACTATAGTACT 70174  
ATTATCCCTGCGTATAATATATATGTATCTACTGGTATTGTTGTTATGAATTTGGATTTA 70114  
TAATGTACCTAATTATAACCATCGTATTTAAATTTATGCTAATATTGACAATGTACTTAATG 70054  
GGTATAACTAGTGTGTTAATGATGTAGCGAACGGTATTATAAGTTGACATATATTGTAAC 69994  
TCTATGAGGCTCTAATGATGGATATATTGGTTACTACGAATTATGGACGTTGATTAGTAT 69934



TAAGTGGCTAAGTTGTGAAAAATATTATTTGAACTAAAGATGTTCCCTGCTAATGTTAATG 69874  
TGATGTTTGATGTGTCACAACCTTTTAAAAATCTATTAATCACGTAAAGTGGAAATTGAGG 69814  
GAATTATCCTGTGGATTTGGATCCTCCATAGGTGATGAACAGTACTTGATTTTATTATGA 69754  
TACAACCTTTTATTGTCTTCCTCCTAATACTATTGGTGCGCATTGCGGATACCCATTAGA 69694

FIGURE S4.– Nucleotide sequence of *bvgypsy-1*. Numbers of nucleotide residues are coordinated with those of BAC clone 33E19. The open reading frame is indicated with its putative translation product. The 1684-bp repeated sequences are underlined. Putative domains are boxed and shown with pfam descriptions.

|        |                                                                        |     |
|--------|------------------------------------------------------------------------|-----|
| ORF18  | ATGGCGTGGTACAGAAATTC AAGGTTTGTCTACAATGCTTTAAAAC TCAACTTGC GTTCC        | 60  |
| ORF19  | ATGGCGTGGTACAGAAATTC AAGGTTTGTCTACAATGCTTTAAAAC TCAACTTGC GTTCC        | 60  |
| ORF20  | ATGGCGTGGTACAGAAATTC AAGGTTTGTCTACAATGCTTTAAAAC TCAACTTGC GTTCC        | 60  |
| ORF21  | ATGGCGTGGTACAGAAATTC AAGGTTTGTCTACAATGCTTTAAAAC TCAACTTGC GTTCC        | 60  |
| TK81-O | ATGGCGTGGTACAGAAATTC AAGGTTTGTCTACAATGCTTTAAAAC TCAACTTGC GTTCC        | 60  |
|        |                                                                        |     |
| ORF18  | AAAACATTTGGTACTATTCCA ACTCCAAGAGTTCATT CGAATTCCTCATCTT TGT TTTAC       | 120 |
| ORF19  | AAAACATTTGGTACTATTCCA ACTCCAAGAGTTCATT CGAATTCCTCATCTT TGT TTTAC       | 120 |
| ORF20  | AAAACATTTGGTACTATTCCA ACTCCAAGAGTTCATT CGAATTCCTCATCTT TGT TTTAC       | 120 |
| ORF21  | AAAACATTTGGTACTATTCCA ACTCCAAGAGTTCATT CGAATTCCTCATCTT TGT TTTAC       | 120 |
| TK81-O | AAAACATTTGGTACTATTCCA ACTCCAAGAGTTCATT CGAATTCCTCATCTT TGT TTTAC       | 120 |
|        |                                                                        |     |
| ORF18  | AATCAATCTACTAATAAGTGT AGTAGGGTTATTTGGGTCTG CAAAATCTGGGTATTTTAA T       | 180 |
| ORF19  | AATCAATCTACTAATAAGTGT AGTAGGGTTATTTGGGTCTG CAAAATCTGGGTATTTTAA T       | 180 |
| ORF20  | AATCAATCTACTAATAAGTGT AGTAGGGTTATTTGGGTCTG CAAAATCTGGGTATTTTAA T       | 180 |
| ORF21  | AATCAATCTACTAATAAGTGT AGTAGGGTTATTTGGGTCTG CAAAATCTGGGTATTTTAA T       | 180 |
| TK81-O | AATCAATCTACTAA---GTGT AGTAGGGTTATTTGGGTCTG CAAAATCTGGGTATTTTAA T       | 177 |
|        |                                                                        |     |
| ORF18  | GGGTTTAAACATCATCAAGAG ATTAGCTCTTCTCTGGTTTT GCAAGGAGAAATTATCAT          | 240 |
| ORF19  | GGGTTTAAACATCATCAAGAG ATTAGCTCTTCTCTGGTTTT GCAAGGAGAAATTATCAT          | 240 |
| ORF20  | GGGTTTAAACATCATCAAGAG ATTAGCTCTTCTCTGGTTTT GCAAGGAGAAATTATCAT          | 240 |
| ORF21  | GGGTTTAAACATCATCAAGAG ATTAGCTCTTCTCTGGTTTT GCAAGGAGAAATTATCAT          | 240 |
| TK81-O | GGGTTTAAACATCATCAAGAG ATTAGCTCTTCTCTGGTTTT GCAAGGAGAAACTATCAT          | 237 |
|        |                                                                        |     |
| ORF18  | GGTGATAAAACCGAAGTAAGT GTTGAATCATGGCTGGAAAA ATTCCTTGTTCCAATTGGA         | 300 |
| ORF19  | GGTGATAAAACCGAAGTAAGT GTTGAATCATGGCTGGAAAA ATTACTTCTTC---TTGCA         | 297 |
| ORF20  | GGTGATAAAACCGAAGTAAGT GTTGAATCATGGCTGGAAAA ATTCCTTGTTCCAATTGGA         | 300 |
| ORF21  | GGTGATAAAACCGAAGTAAGT GTTGAATCATGGCTGGAAAA ATTCCTTGTTCCAATTGGA         | 300 |
| TK81-O | GGTGATAAAACCGAAGTAAGT GTTGAATTTCCGGTGGAAAA ATTACTTCTTGAATTGCA          | 297 |
|        |                                                                        |     |
| ORF18  | C-----TAATCTTGACTTTTGG TATACTTGGTTACCCTCATG <u>TGCACCCAGTAGTT</u>      | 351 |
| ORF19  | GTTGCAC---TAATCTTGA----- TTGCTTACCGTCATG <u>TGCACCCAGTAGTT</u>         | 342 |
| ORF20  | C-----TAATCTTGACTTTTGG TATACTTGGTTACCCTCATG <u>TGCACCCAGTAGTT</u>      | 351 |
| ORF21  | C-----TAATCTTGACTTTTGG TATACTTGGTTACCCTCATG <u>TGCACCCAGTAGTT</u>      | 351 |
| TK81-O | C-----TAATAATCTCGCATTC TGGTATGATTGCTTTCTTTT ATTT <u>TGCACCCAGTAGTT</u> | 351 |

|        |                                                                        |     |
|--------|------------------------------------------------------------------------|-----|
| ORF18  | <u>GTGCCA</u> TATACAGGAAGGAAGCATTATGTGCTTATGTCAACAACCTCGTGAGAATGAAATT  | 411 |
| ORF19  | <u>GTGCCA</u> TATACAGGAAGGAAGCATTATGTGCTTATGTCAACAACCTCGTGAGAATGAAAAAT | 402 |
| ORF20  | <u>GTGCCA</u> TATACAGGAAGGAAGCATTATGTGCTTATGTCAACAACCTCGTGAGAATGAAATT  | 411 |
| ORF21  | <u>GTGCCA</u> TATACAGGAAGGAAGCATTATGTGCTTATGTCAACAACCTCGTGAGAATGAAATT  | 411 |
| TK81-O | <u>GTGCCA</u> TATACAGGAAGGAAGCATTATGTGATTTTGTCAACAACCTCATGAGAATGAAAAAT | 411 |
|        | D-Fw                                                                   |     |
| ORF18  | GGAGAAGTTGAGAAGCGGAAAAATACAACCTGCTACACACCCCTGATACTGATAGGGTTAGG         | 471 |
| ORF19  | GGAGAAGTTGAGAAGCGGAAAAATACAACCTGCTACACACCCCTGATACTGAGAGGGTTAGG         | 462 |
| ORF20  | GGAGAAGTTGAGAAGCGGAAAAATACAACCTGCTACACACCCCTGATACTGATAGGGTTAGG         | 471 |
| ORF21  | GGAGAAGTTGAGAAGCGGAAAAATACAACCTGCTACACACCCCTGATACTGATAGGGTTAGG         | 471 |
| TK81-O | GGAGAATTGAGAAGCGGAAAAATACAACCTGCTACACACCCCTGATACTGAGAGGGTTAGG          | 471 |
| ORF18  | TCAATATTCCAACACATTCTTGAATCACTGGAAAGAGAGATTAATCACCATGAACTCGAA           | 531 |
| ORF19  | TCTATATTCCAACACATTATTGAATCACTGGAAAGAGAGATTAATCACCATGAACTCGAA           | 522 |
| ORF20  | TCAATATTCCAACACATTCTTGAATCACTGGAAAGAGAGATTAATCACCATGAACTCGAA           | 531 |
| ORF21  | TCAATATTCCAACACATTCTTGAATCACTGGAAAGAGAGATTAATCACCATGAACTCGAA           | 531 |
| TK81-O | TCTATATTCCAACACATTCTTGAATCACTGGAAAGAGAGATTAATCACCATGAACTCGAA           | 531 |
| ORF18  | CTCGAACTCGAA-----AGAGATGAAACTTTCAAGGAGAAAACCATTGGAAGGAGGAG             | 585 |
| ORF19  | CTCGAA-----AGAGATGAAACTTTCAAGGAGAAAACCATTGGAAGGAGGAG                   | 570 |
| ORF20  | CTCGAA-----AGAGATGAAACTTTCAAGGAGAAAACCATTGGAAGGAGGAG                   | 579 |
| ORF21  | CTCGAACTCGAA-----AGAGATGAAACTTTCAAGGAGAAAACCATTGGAAGGAGGAG             | 585 |
| TK81-O | CTCGAACTCGAACTCGAAAGAGATGAAACTTTCAAGGAGAAAACCATTGGAAGGAGGAG            | 591 |
| ORF18  | ACAGTTGATGATAAAGATAGTAGGAAGAAGCATAAGTGGGGCTAAGATAACTACTAACCAT          | 645 |
| ORF19  | ACAGTTGATGATAAAGATAGTAGGAAGAAGCATAAGTGGGGCTAAGATAACTACTAACCAT          | 630 |
| ORF20  | ACAGTTGATGATAAAGATAGTAGGAAGAAGCATAAGTGGGGCTAAGATAACTACTAACCAT          | 639 |
| ORF21  | ACAGTTGATGATAAAGATAGTAGGAAGAAGCATAAGTGGGGCTAAGATAACTACTAACCAT          | 645 |
| TK81-O | ACAGATCATGATAAAGATAGTAGGAAGAAGCATAAGTGGGGCTAAGATAACTACTAACCAT          | 651 |
| ORF18  | TTGGAAGGGATGAATTGGGAAATTTTCGTTGTTGATAAACCGTTGGTTGAGTCCAGTTAT           | 705 |
| ORF19  | TTGGAAGGGTGAATTGGGAAATTTTCGTTGTTGATAAACCGTTGGTTGAGTCCAGTTGT            | 690 |
| ORF20  | TTGGAAGGGATGAATTGGGAAATTTTCGTTGTTGATAAACCGTTGGTTGAGTCCAGTTAT           | 699 |
| ORF21  | TTGGAAGGGATGAATTGGGAAATTTTCGTTGTTGATAAACCGTTGGTTGAGTCCAGTTAT           | 705 |
| TK81-O | ---GAAGGGATGAATTGGGAAATTTTCGTTGTCGATAAACCGTTGGTTGAGTCCAGTTGT           | 708 |

ORF18 TTATTAGGTGGGAAGATTGTTGTTTACACCGGATTGCTCAACCATT-GCAACTCTGATG 763  
 ORF19 TTATTTGATGGGAAGATTGTTGTTTACACCGGATTGCTCAACCATTT-CAACTCTGATG 748  
 ORF20 TTATTAGGTGGGAAGATTGTTGTTTACACCGGATTGCTCAACCATT-GCAACTCTGATG 757  
 ORF21 TTATTAGGTGGGAAGATTGTTGTTTACACCGGATTGCTCAACCATT-GCAACTCTGATG 763  
 TK81-0 ATATTTGGTGGGAAGATTGTTGTTTACACTGGATTGCTCAACCATTTG-ATCTCTGATG 766

Intron 1

ORF18 CTGAATTGGCTACAATTATCGCGCATCAGGTTGGGCATGCTGTGGCTCGACATGAGGCAG 823  
 ORF19 CTGAATTGGCTACAATTATCGCGCATCAGGTTGGGCATGCTGTGGCTCGACATGAGGCAG 808  
 ORF20 CTGAATTGGCTACAATTATCGCGCATCAGGTTGGGCATGCTGTGGCTCGACATGAGGCAG 817  
 ORF21 CTGAATTGGCTACAATTATCGCGCATCAGGTTGGGCATGCTGTGGCTCGACATGAGGCAG 823  
 TK81-0 CTGAATTGGCTACAATTATCGCGCATCAGGTTGGGCATGCTGTGGCTCGACATGAGGCAG 826

Gre

ORF18 AGGATTGCAGACGATTTTCTGGTTGTTAATA---TCCCTCAACGTGATATTATTTAAAA 880  
 ORF19 AGCATTGGACAGCATTGTTCTGGTGGTCAATGTTAGGGTTCACGTGACATTATTTGAAA 868  
 ORF20 AGGATTGCAGACGATTTTCTGGTTGTTAATA---TCCCTCAACGTGATATTATTTAAAA 874  
 ORF21 AGGATTGCAGACGATTTTCTGGTTGTTAATA---TCCCTCAACGTGATATTATTTAAAA 880  
 TK81-0 AGCATTGGACAACATTGTTGTGGTCGATACTGTTAGTGATATACATGACAATATTTCAAT 886

ORF18 TTCTATTTACTGAGCCTGAATCTGCCAATGCAAGATCAAACTACTCTTAAGGCATCCTC 940  
 ORF19 TTCTATTTACTGCGCCTGAATTTGCCAATGCAAGATCAAACTACTCTTAAGGCATCCTC 928  
 ORF20 TTCTATTTACTGAGCCTGAATCTGCCAATGCAAGATCAAACTACTCTTAAGGCATCCTC 934  
 ORF21 TTCTATTTACTGAGCCTGAATCTGCCAATGCAAGATCAAACTACTCTTAAGGCATCCTC 940  
 TK81-0 ATCTATTTACTGCGCCTGAATTTGCCAATGCAATATCAAACTACTCTCAAGGCATCCTC 946

Intron 2

ORF18 TCTTGCAAAAAGTTTGGGAAGATTATTCAGGCTAGAGCTCCACAATTACTGCCACGAACTA 1000  
 ORF19 TCTTGCAAAAAGTTTGGGAAGATTATTCAGGCTAGATTTCATCAATTACTGCCACGAACTA 988  
 ORF20 TCTTGCAAAAAGTTTGGGAAGATTATTCAGGCTAGAGCTCCACAATTACTGCCACGAACTA 994  
 ORF21 TCTTGCAAAAAGTTTGGGAAGATTATTCAGGCTAGAGCTCCACAATTACTGCCACGAACTA 1000  
 TK81-0 TCTTGCAAAAAGTTTGGGAAGATTATTCAGGCTAGATTTCATCAATTACTGCCACGAACTA 1006

D-Rv

ORF18 TCT---GCTTGTCCTTGTGGATTGTTTCCCTCGGTGTTTATTCTTTATTATGGTCGGA 1057  
 ORF19 CCTTGCAGATTGGGCTTTGTTGGATTGTCTTCCCTGGTGTATTCTTTATTTTGGTCGGA 1048  
 ORF20 TCT---GCTTGTCCTTGTGGATTGTTTCCCTCGGTGTTTATTCTTTATTATGGTCGGA 1051  
 ORF21 TCT---GCTTGTCCTTGTGGATTGTTTCCCTCGGTGTTTATTCTTTATTATGGTCGGA 1057  
 TK81-0 CCTTGCACCTTGGGCTTTCTTGGATTGTCTTCCCTGGTGTATTCTTTATTTTGGTCGGA 1066

```

ORF18      AGGAAATAGAAGCAGATCACATTGGAGTGCTTCTGATGGCTTCTGCTGGATACGACCCGC 1117
ORF19      AGGAAATAGAAGCAGATCACATTGGAGTGCTTCTGATGGCTTCTGCTGGATACGACCCGC 1108
ORF20      AGGAAATAGAAGCAGATCACATTGGAGTGCTTCTGATGGCTTCTGCTGGATACGACCCGC 1111
ORF21      AGGAAATAGAAGCAGATCACATTGGAGTGCTTCTGATGGCTTCTGCTGGATACGACCCGC 1117
TK81-O     AGGAAATAGAAGCAGATCACATTGGAGTGCTTCTGATGGCTTCTGCTGGATACGACCCGC 1126

ORF18      GAGTTGCACCTCAAGTATATGACAAGCTTGCAAAGCCACTGGGCGACTGGAAGTGTTTAG 1177
ORF19      GAGTTGCACCTCAAGTATATGACAAGCTTGCAAAGCCACTGGGCGACTGGAAGTGTTTAG 1168
ORF20      GAGTTGCACCTCAAGTATATGACAAGCTTGCAAAGCCACTGGGCGACTGGAAGTGTTTAG 1171
ORF21      GAGTTGCACCTCAAGTATATGACAAGCTTGCAAAGCCACTGGGCGACTGGAAGTGTTTAG 1177
TK81-O     GAGTTGCACCTCAAGTATATGACAAGCTTGCAAAGCCACTGGGCGACTGGAAGTGTTTAG 1186

ORF18      CAACTCATCCATTTGCAAGAATGAGAGCAAAGTTGTTAGCTCGAGCTGATGTTATGAAGG 1237
ORF19      CAACTCATCCATTTGCAAGAATGAGAGCAAAGTTGTTAGCTCGAGCTGATGTTATGAAGG 1228
ORF20      CAACTCATCCATTTGCAAGAATGAGAGCAAAGTTGTTAGCTCGAGCTGATGTTATGAAGG 1231
ORF21      CAACTCATCCATTTGCAAGAATGAGAGCAAAGTTGTTAGCTCGAGCTGATGTTATGAAGG 1237
TK81-O     CAACTCATCCATTTGCAAGAATGAGAGCAAAGTTGTTAGCTCGAGCTGATGTTATGAAGG 1246

ORF18      AAGCAGATAAGATATACAATGAAGTTGTAGCAGGACGTGCAATTCAAGGTCTTCAGTAA 1296
ORF19      AAGCAGATAAGATATACAATGAAGTTGTAGCAGGACGTGCAATTCAAGGTCTTCAGTAA 1287
ORF20      AAGCAGATAAGATATACAATGAAGTTGTAGCAGGACGTGCAATTCAAGGTCTTCAGTAA 1290
ORF21      AAGCAGATAAGATATACAATGAAGTTGTAGCAGGACGTGCAATTCAAGGTCTTCAGTAA 1296
TK81-O     AAGCAGATAAGATATACAATGAAGTTGTAGCAGGACGTGCAATTCAAGGTCTTCAGTAA 1305

```

FIGURE S5.– Sequence alignment of *bvORF18* (ORF18), *bvORF19* (ORF19), *bvORF20* (ORF20), *bvORF21* (ORF21), and *bvORF20L* (TK81-O). Hyphens indicate gaps inserted for maximum matching. Residues of nucleotide sequences are numbered from the translational initiation codon. Positions of introns are shown with black triangles, but the intronic sequences are not shown. Exon/intron boundaries have been experimentally confirmed (H. Matsuhira, T. Mikami and T. Kubo, manuscript in preparation). Primer sequences are underlined. Nucleotide residues corresponding to Site 1 and Site 2 in Figure 4 are shown by red and blue letters, respectively. 5'-CTCGAA-3' repeated sequences are indicated by purple letters.

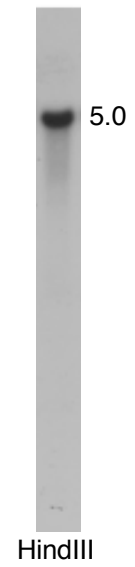

FIGURE S6.– Gel blot analyses using bvORF16 sequence as a probe. Total cellular DNA of NK–198 was used. Size of signal band is given in kbp. DNA fragment for the hybridization probe was generated by PCR using a pair of primers (5'-TGTGTATGCTGTTCTGGTTGA -3' and 5'-AACATCTCCCTAGCCTTCCT -3') and a BAC clone DNA as a template.

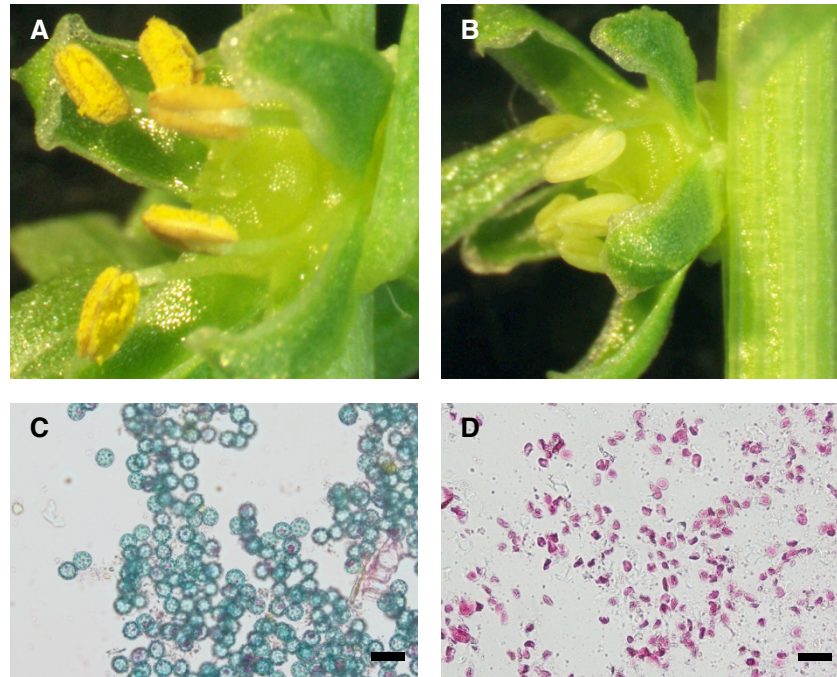

FIGURE S7.– Comparison of anther morphology and anther content between two sugar-beet plants derived from the 14 F1 plants. Panels A and C show photographs taken from a plant having the biaphos-resistance gene. Panels B and D show photographs taken from a plant missing the biaphos-resistance gene. A and B, anther morphology. C and D, images of Alexander's staining (scale bars; 20  $\mu$ m).

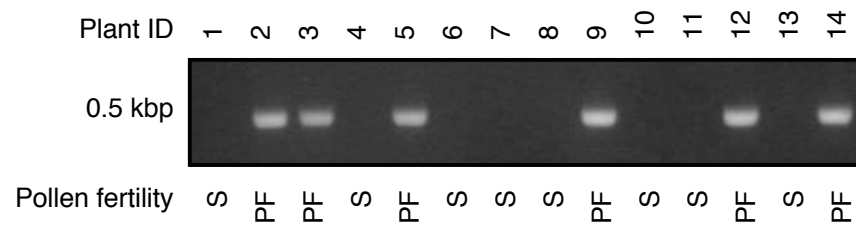

FIGURE S8.– Co-segregation analysis between the bialaphos-resistance gene and partial fertility. Agarose gel electrophoresis of PCR products resulting from amplification using primers targeting the bialaphos-resistance gene. Size of the amplicon is shown on the left. Plant ID and pollen fertility is shown above and below the photograph, respectively. PF and S indicate partial fertility and complete sterility, respectively.





File S1. List of gene sequences used for phylogenetic analysis.

| Name of genes  | Label in tree |
|----------------|---------------|
| AtPPR_1g01970* | AT1g01970     |
| AtPPR_1g02060  | AT1g02060     |
| AtPPR_1g02150  | AT1g02150     |
| AtPPR_1g02370  | AT1g02370     |
| AtPPR_1g02420  | AT1g02420     |
| AtPPR_1g03100  | AT1g03100     |
| AtPPR_1g03560  | AT1g03560     |
| AtPPR_1g05600  | AT1g05600     |
| AtPPR_1g05670  | AT1g05670     |
| AtPPR_1g06270  | AT1g06270     |
| AtPPR_1g06580  | AtRFL1        |
| AtPPR_1g06710  | AT1g06710     |
| AtPPR_1g07590  | AT1g07590     |
| AtPPR_1g07740  | AT1g07740     |
| AtPPR_1g08610  | AT1g08610     |
| AtPPR_1g09680  | AT1g09680     |
| AtPPR_1g09820  | AT1g09820     |
| AtPPR_1g09900  | AT1g09900     |
| AtPPR_1g10270  | AT1g10270     |
| AtPPR_1g10910  | AT1g10910     |
| AtPPR_1g11630  | AT1g11630     |
| AtPPR_1g11710  | AT1g11710     |
| AtPPR_1g11900  | AT1g11900     |
| AtPPR_1g12300  | AtRFL2        |
| AtPPR_1g12620  | AtRFL3        |
| AtPPR_1g12700  | AtRFL4        |
| AtPPR_1g12770  | AT1g12770     |
| AtPPR_1g13040  | AT1g13040     |
| AtPPR_1g13630  | AT1g13630     |
| AtPPR_1g13800  | AT1g13800     |
| AtPPR_1g15480  | AT1g15480     |
| AtPPR_1g16830  | AT1g16830     |
| AtPPR_1g18900  | AT1g18900     |
| AtPPR_1g19290  | AT1g19290     |
| AtPPR_1g19520  | AT1g19520     |
| AtPPR_1g20300  | AT1g20300     |
| AtPPR_1g22960  | AT1g22960     |
| AtPPR_1g26460  | AT1g26460     |
| AtPPR_1g26500  | AT1g26500     |
| AtPPR_1g28020  | AT1g28020     |
| AtPPR_1g30610  | AT1g30610     |
| AtPPR_1g31790  | AT1g31790     |
| AtPPR_1g31840  | AT1g31840     |
| AtPPR_1g43010  | AT1g43010     |
| AtPPR_1g51965  | AT1g51965     |
| AtPPR_1g52620  | AT1g52620     |
| AtPPR_1g52640  | AT1g52640     |
| AtPPR_1g53330  | AT1g53330     |
| AtPPR_1g55630  | AT1g55630     |
| AtPPR_1g55890  | AT1g55890     |
| AtPPR_1g60770  | AT1g60770     |
| AtPPR_1g61870  | AT1g61870     |

|               |           |
|---------------|-----------|
| AtPPR_1g62350 | AT1g62350 |
| AtPPR_1g62590 | AtRFL5    |
| AtPPR_1g62670 | AtRFL6    |
| AtPPR_1g62680 | AtRFL7    |
| AtPPR_1g62720 | AtRFL8    |
| AtPPR_1g62910 | AtRFL9    |
| AtPPR_1g62930 | AtRFL11   |
| AtPPR_1g63070 | AtRFL12   |
| AtPPR_1g63080 | AtRFL13   |
| AtPPR_1g63130 | AtRFL14   |
| AtPPR_1g63150 | AtRFL15   |
| AtPPR_1g63330 | AtRFL16   |
| AtPPR_1g63400 | AtRFL17   |
| AtPPR_1g64100 | AtRFL18   |
| AtPPR_1g64580 | AtRFL19   |
| AtPPR_1g64585 | AT1g64585 |
| AtPPR_1g66345 | AT1g66345 |
| AtPPR_1g68980 | AT1g68980 |
| AtPPR_1g69290 | AT1g69290 |
| AtPPR_1g71060 | AT1g71060 |
| AtPPR_1g71210 | AT1g71210 |
| AtPPR_1g73400 | AT1g73400 |
| AtPPR_1g73710 | AT1g73710 |
| AtPPR_1g74580 | AT1g74580 |
| AtPPR_1g74750 | AT1g74750 |
| AtPPR_1g74850 | AT1g74850 |
| AtPPR_1g74900 | AT1g74900 |
| AtPPR_1g76280 | AT1g76280 |
| AtPPR_1g77360 | AT1g77360 |
| AtPPR_1g77405 | AT1g77405 |
| AtPPR_1g79080 | AT1g79080 |
| AtPPR_1g79490 | AT1g79490 |
| AtPPR_1g79540 | AT1g79540 |
| AtPPR_1g80150 | AT1g80150 |
| AtPPR_1g80270 | AT1g80270 |
| AtPPR_1g80550 | AT1g80550 |
| AtPPR_1g80880 | AT1g80880 |
| AtPPR_2g01360 | AT2g01360 |
| AtPPR_2g01390 | AT2g01390 |
| AtPPR_2g01740 | AT2g01740 |
| AtPPR_2g01860 | AT2g01860 |
| AtPPR_2g02150 | AT2g02150 |
| AtPPR_2g06000 | AT2g06000 |
| AtPPR_2g13420 | AT2g13420 |
| AtPPR_2g15630 | AT2g15630 |
| AtPPR_2g15820 | AT2g15820 |
| AtPPR_2g15980 | AT2g15980 |
| AtPPR_2g16880 | AT2g16880 |
| AtPPR_2g17033 | AT2g17033 |
| AtPPR_2g17140 | AT2g17140 |
| AtPPR_2g17525 | AT2g17525 |
| AtPPR_2g17670 | AT2g17670 |
| AtPPR_2g18520 | AT2g18520 |
| AtPPR_2g18940 | AT2g18940 |

|               |           |
|---------------|-----------|
| AtPPR_2g19280 | AT2g19280 |
| AtPPR_2g20710 | AT2g20710 |
| AtPPR_2g26790 | AT2g26790 |
| AtPPR_2g27800 | AT2g27800 |
| AtPPR_2g28050 | AT2g28050 |
| AtPPR_2g30100 | AT2g30100 |
| AtPPR_2g30780 | AT2g30780 |
| AtPPR_2g31400 | AT2g31400 |
| AtPPR_2g32230 | AT2g32230 |
| AtPPR_2g32630 | AT2g32630 |
| AtPPR_2g35130 | AT2g35130 |
| AtPPR_2g36240 | AT2g36240 |
| AtPPR_2g37230 | AT2g37230 |
| AtPPR_2g38420 | AT2g38420 |
| AtPPR_2g39230 | AT2g39230 |
| AtPPR_2g40240 | AT2g40240 |
| AtPPR_2g41720 | AT2g41720 |
| AtPPR_2g48000 | AT2g48000 |
| AtPPR_3g02490 | AT3g02490 |
| AtPPR_3g02650 | AT3g02650 |
| AtPPR_3g04130 | AT3g04130 |
| AtPPR_3g04760 | AT3g04760 |
| AtPPR_3g06430 | AT3g06430 |
| AtPPR_3g06920 | AT3g06920 |
| AtPPR_3g07290 | AT3g07290 |
| AtPPR_3g09060 | AT3g09060 |
| AtPPR_3g09650 | AT3g09650 |
| AtPPR_3g13150 | AT3g13150 |
| AtPPR_3g13160 | AT3g13160 |
| AtPPR_3g14580 | AT3g14580 |
| AtPPR_3g15200 | AT3g15200 |
| AtPPR_3g15590 | AT3g15590 |
| AtPPR_3g16010 | AT3g16010 |
| AtPPR_3g16710 | AtRFL20   |
| AtPPR_3g16890 | AT3g16890 |
| AtPPR_3g18020 | AT3g18020 |
| AtPPR_3g18110 | AT3g18110 |
| AtPPR_3g22470 | AtRFL21   |
| AtPPR_3g22670 | AT3g22670 |
| AtPPR_3g23020 | AT3g23020 |
| AtPPR_3g25210 | AT3g25210 |
| AtPPR_3g29290 | AT3g29290 |
| AtPPR_3g42630 | AT3g42630 |
| AtPPR_3g46610 | AT3g46610 |
| AtPPR_3g46870 | AT3g46870 |
| AtPPR_3g48250 | AT3g48250 |
| AtPPR_3g48810 | AT3g48810 |
| AtPPR_3g49240 | AT3g49240 |
| AtPPR_3g49730 | AT3g49730 |
| AtPPR_3g53170 | AT3g53170 |
| AtPPR_3g53700 | AT3g53700 |
| AtPPR_3g54980 | AT3g54980 |
| AtPPR_3g56030 | AT3g56030 |
| AtPPR_3g59040 | AT3g59040 |

|               |           |
|---------------|-----------|
| AtPPR_3g60050 | AT3g60050 |
| AtPPR_3g60960 | AT3g60960 |
| AtPPR_3g60980 | AT3g60980 |
| AtPPR_3g61360 | AT3g61360 |
| AtPPR_3g61520 | AT3g61520 |
| AtPPR_3g62470 | AT3g62470 |
| AtPPR_3g62540 | AT3g62540 |
| AtPPR_4g01400 | AT4g01400 |
| AtPPR_4g01570 | AT4g01570 |
| AtPPR_4g01990 | AT4g01990 |
| AtPPR_4g02820 | AT4g02820 |
| AtPPR_4g04790 | AT4g04790 |
| AtPPR_4g11690 | AT4g11690 |
| AtPPR_4g14190 | AT4g14190 |
| AtPPR_4g16390 | AT4g16390 |
| AtPPR_4g17618 | AT4g17618 |
| AtPPR_4g17910 | AT4g17910 |
| AtPPR_4g18975 | AT4g18975 |
| AtPPR_4g19440 | AT4g19440 |
| AtPPR_4g19900 | AT4g19900 |
| AtPPR_4g20090 | AT4g20090 |
| AtPPR_4g20740 | AT4g20740 |
| AtPPR_4g21170 | AT4g21170 |
| AtPPR_4g21190 | AT4g21190 |
| AtPPR_4g21705 | AT4g21705 |
| AtPPR_4g21880 | AT4g21880 |
| AtPPR_4g26680 | AT4g26680 |
| AtPPR_4g28010 | AT4g28010 |
| AtPPR_4g30825 | AT4g30825 |
| AtPPR_4g31850 | AT4g31850 |
| AtPPR_4g34830 | AT4g34830 |
| AtPPR_4g35850 | AT4g35850 |
| AtPPR_4g36680 | AT4g36680 |
| AtPPR_4g38150 | AT4g38150 |
| AtPPR_4g39620 | AT4g39620 |
| AtPPR_5g01110 | AT5g01110 |
| AtPPR_5g02830 | AT5g02830 |
| AtPPR_5g02860 | AT5g02860 |
| AtPPR_5g04810 | AT5g04810 |
| AtPPR_5g06400 | AT5g06400 |
| AtPPR_5g08315 | AT5g08315 |
| AtPPR_5g09450 | AT5g09450 |
| AtPPR_5g10690 | AT5g10690 |
| AtPPR_5g11310 | AT5g11310 |
| AtPPR_5g12100 | AT5g12100 |
| AtPPR_5g13770 | AT5g13770 |
| AtPPR_5g14080 | AT5g14080 |
| AtPPR_5g14770 | AT5g14770 |
| AtPPR_5g14820 | AT5g14820 |
| AtPPR_5g15010 | AT5g15010 |
| AtPPR_5g15280 | AT5g15280 |
| AtPPR_5g15980 | AT5g15980 |
| AtPPR_5g16420 | AT5g16420 |
| AtPPR_5g16640 | AtRFL23   |

|                             |           |
|-----------------------------|-----------|
| AtPPR_5g18390               | AT5g18390 |
| AtPPR_5g18475               | AT5g18475 |
| AtPPR_5g18950               | AT5g18950 |
| AtPPR_5g21222               | AT5g21222 |
| AtPPR_5g24830               | AT5g24830 |
| AtPPR_5g25630               | AT5g25630 |
| AtPPR_5g27270               | AT5g27270 |
| AtPPR_5g27460               | AT5g27460 |
| AtPPR_5g28460               | AT5g28460 |
| AtPPR_5g38730               | AT5g38730 |
| AtPPR_5g39710               | AT5g39710 |
| AtPPR_5g39980               | AT5g39980 |
| AtPPR_5g40400               | AT5g40400 |
| AtPPR_5g41170               | AtRFL24   |
| AtPPR_5g42310               | At_CRP1   |
| AtPPR_5g43820               | AT5g43820 |
| AtPPR_5g46100               | AT5g46100 |
| AtPPR_5g46580               | AT5g46580 |
| AtPPR_5g46680               | AT5g46680 |
| AtPPR_5g47360               | AT5g47360 |
| AtPPR_5g48730               | AT5g48730 |
| AtPPR_5g50280               | AT5g50280 |
| AtPPR_5g55840               | AT5g55840 |
| AtPPR_5g57260               | AT5g57260 |
| AtPPR_5g59900               | AT5g59900 |
| AtPPR_5g60960               | AT5g60960 |
| AtPPR_5g61370               | AT5g61370 |
| AtPPR_5g61400               | AT5g61400 |
| AtPPR_5g61990               | AT5g61990 |
| AtPPR_5g62370               | AT5g62370 |
| AtPPR_5g64320               | AT5g64320 |
| AtPPR_5g65560               | AT5g65560 |
| AtPPR_5g65820               | AT5g65820 |
| AtPPR_5g66635               | AT5g66635 |
| AtPPR_5g67570               | AT5g67570 |
| AtPPR_1g62910               | AtRFL10   |
| AtPPR_4g26800               | AtRFL22   |
| AtPPR_1g12770               | AtRFL25   |
| AtPPR_1g64585               | AtRFL26   |
| Glyma01g07140 <sup>*2</sup> | GmRFL1    |
| Glyma01g07300               | GmRFL2    |
| Glyma02g09530               | GmRFL3    |
| Glyma05g28430               | GmRFL4    |
| Glyma0679s00210             | GmRFL5    |
| Glyma07g11290               | GmRFL6    |
| Glyma07g11410               | GmRFL7    |
| Glyma07g27410               | GmRFL8    |
| Glyma08g05770               | GmRFL9    |
| Glyma09g07250               | GmRFL10   |
| Glyma09g07290               | GmRFL11   |
| Glyma09g07300               | GmRFL12   |
| Glyma09g28360               | GmRFL13   |
| Glyma09g30160               | GmRFL14   |
| Glyma09g30500               | GmRFL15   |

|                                                  |           |
|--------------------------------------------------|-----------|
| Glyma09g30530                                    | GmRFL16   |
| Glyma09g30620                                    | GmRFL18   |
| Glyma09g30640                                    | GmRFL19   |
| Glyma09g30680                                    | GmRFL20   |
| Glyma09g30720                                    | GmRFL21   |
| Glyma09g30740                                    | GmRFL22   |
| Glyma09g30940                                    | GmRFL23   |
| Glyma09g39260                                    | GmRFL24   |
| Glyma09g39940                                    | GmRFL25   |
| Glyma10g00540                                    | GmRFL26   |
| Glyma14g38270                                    | GmRFL28   |
| Glyma15g24040                                    | GmRFL29   |
| Glyma16g25410                                    | GmRFL30   |
| Glyma16g27600                                    | GmRFL31   |
| Glyma16g27640                                    | GmRFL32   |
| Glyma16g27790                                    | GmRFL33   |
| Glyma16g27800                                    | GmRFL34   |
| Glyma16g28020                                    | GmRFL35   |
| Glyma16g31950                                    | GmRFL36   |
| Glyma16g31960                                    | GmRFL37   |
| Glyma16g32030                                    | GmRFL38   |
| Glyma16g32050                                    | GmRFL39   |
| Glyma16g32420                                    | GmRFL40   |
| Glyma18g46270                                    | GmRFL41   |
| jgi Poptr1 556096 eugene3.00040809 <sup>*3</sup> | PtRFL1    |
| jgi Poptr1 561788 eugene3.00061747               | PtRFL2    |
| jgi Poptr1 561789 eugene3.00061748               | PtRFL3    |
| jgi Poptr1 562052 eugene3.00062011               | PtRFL4    |
| jgi Poptr1 570945 eugene3.00130309               | PtRFL5    |
| jgi Poptr1 570961 eugene3.00130325               | PtRFL6    |
| jgi Poptr1 570963 eugene3.00130327               | PtRFL7    |
| jgi Poptr1 571830 eugene3.00131194               | PtRFL8    |
| jgi Poptr1 573736 eugene3.00190210               | PtRFL9    |
| jgi Poptr1 581077 eugene3.01250075               | PtRFL10   |
| jgi Poptr1 581161 eugene3.127570001              | PtRFL11   |
| jgi Poptr1 594495 eugene3.00640083               | PtRFL12   |
| jgi Poptr1 595453 eugene3.00700094               | PtRFL13   |
| jgi Poptr1 595455 eugene3.00700096               | PtRFL14   |
| jgi Poptr1 595479 eugene3.00700120               | PtRFL15   |
| jgi Poptr1 595494 eugene3.00700135               | PtRFL16   |
| jgi Poptr1 595495 eugene3.00700136               | PtRFL17   |
| jgi Poptr1 595506 eugene3.00700147               | PtRFL18   |
| jgi Poptr1 562855 eugene3.00070793               | PtRFL19   |
| jgi Poptr1 572581 eugene3.00140626               | PtRFL20   |
| AAM52339 <sup>*4</sup>                           | PPR-592   |
| CAD61285                                         | radish-Rf |
| <i>bvORF16</i> <sup>*5</sup>                     | bvORF16   |

\*1 <http://www.plantenergy.uwa.edu.au/applications/ppr/ppr.php> and <http://www.arabidopsis.org/tools/bulk/sequences/index.jsp>

\*2 [http://www.phytozome.net/search.php?show=text&org=Org\\_Gmax\\_v1.1](http://www.phytozome.net/search.php?show=text&org=Org_Gmax_v1.1)

\*3 [http://www.phytozome.net/search.php?show=blast&method=Org\\_Ptrichocarpa\\_v2.2](http://www.phytozome.net/search.php?show=blast&method=Org_Ptrichocarpa_v2.2)

\*4 DDBJ/GenBank/EMBL dataase

\*5 This study

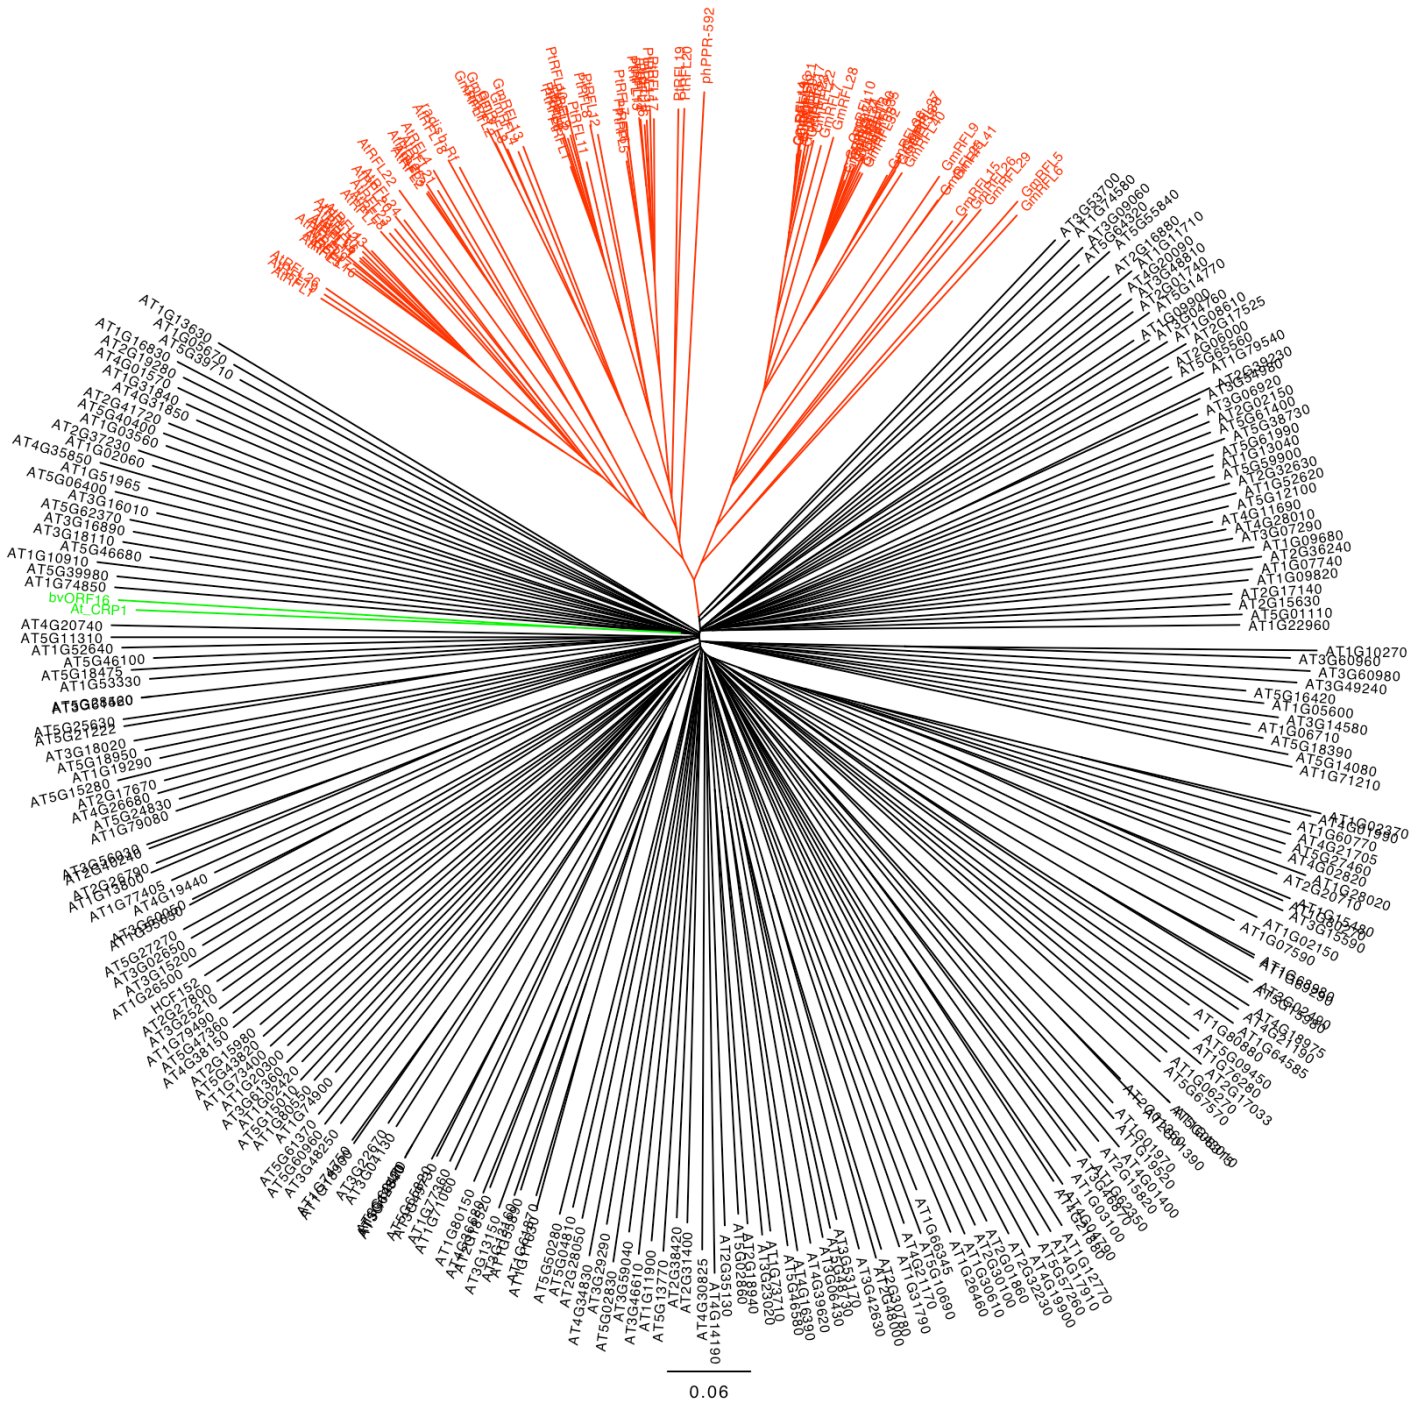

File S2. Phylogenetic tree drawn by the Neighbor-Joining method. Amino acid sequences listed in File S1 were aligned using ClustalW (<http://clustalw.ddbj.nig.ac.jp/index.php?lang=ja>) and tree data were obtained. The tree was drawn using FigTree software (<http://tree.bio.ed.ac.uk/software/figtree/>). The tree includes: P-type PPR proteins from *Arabidopsis thaliana* (O'Toole et al., Mol. Biol. Evol., 2008, 25: 1120-1128); soybean PPR-type Rf-like (RFL) proteins (Fujii et al., PNAS, 2011, 108: 1723-1728); poplar RFL proteins (Fujii et al., PNAS, 2011, 108: 1723-1728); petunia RF protein (Bentolila et al., PNAS, 2002, 99: 10887-10892); radish RF protein (Brown et al. Plant J., 2003, 35: 262-272; Desloire et al., EMBO Rep., 2003, 4: 588-594; Koizuka et al., Plant J., 2003, 34: 407-415); and bvORF16. Clades including bvORF16 and AT5g42310 (At\_CRP1), and RF and RFL are colored by green and red, respectively.



```

At_OMA1 MSWYRRTKLVFDSLRNINPKILPRSHVTSRINNPIGSSNPSAKFSSIS 50
Os_OMA1 MNYLKNSRSVLSRLLR-HKPTGCPRLPPSP----PLPQAPPAGYYFTSPS 45
BV_ORF19 MAWYRNSRFVYNALKLNLRSKTFGTIPTPR-----VHSNSSSLFYNQST 44
Sc_OMA1 M-----LRNIIRFKGFG-----KGTSGGFLKPVSF 25

At_OMA1 REVGLRSWTSLGRNTNRIAYNPFLSQPKRYYYVD--RYQVRHFKPRGPGR 98
Os_OMA1 RPEAVRFGRVLLRSP-PPPPRPAQAPPSRYFYTSPQRQKVVFNRRRGSR 94
BV_ORF19 NKCSGLFGSAKSGYFNGFKHHQEISSFSGFARRN-----YHGDKTEVSV 88
Sc_OMA1 R----VQLTRCYRYDNGPSYRRFNG-----EYSQKSSFK 56

At_OMA1 WFQNPRTVFTVVVLVGSVCLITLIVGNTETIPYTKRTHFILLSKPMEKLLG 148
Os_OMA1 WYHDPKRLTTVVVVVSGGAAAAYVFGNLETVPYTNRTHLILLSPPLERQLG 144
BV_ORF19 ESWLEKFLVPIGLILTFGILGYPHVHPVVVYPYTKRKHVVLMTTRENETG 138
Sc_OMA1 SILLDKSSRKYLALLFGCCSLFYTHLDAKAVSDRSRFTWVSRPLELTIC 106

At_OMA1 ETQFEQIKKTYQGKILPATHPESIRVRLTAKEVIDALORGLS----NERV 194
Os_OMA1 ESQFNNLKKELGPKILPLHPDSIRVRLTASEVVRVAVHRLAGRHDAFA 194
BV_ORF19 EVEKR-----KIQPATHPDTDRVRSIFOHILESLEREIN----- 172
Sc_OMA1 NYTYKSIWRQTQOEILPQHPLSIKIENIFMKIVEAAYKDPS----- 148

At_OMA1 WSDLGYASTESSLGGG-SDKGVKEMEMAMS--GEDTMTDMKWSKEDQVLD 241
Os_OMA1 ADDASYGDISTDVVIKNHEAGAEDVMLGRSRGNKNASVAAAQRDEEVL 244
BV_ORF19 -----HHELELELE---RDETFKEKTIWKEETVD 198
Sc_OMA1 -----

At_OMA1 DQWIQSRK--KDSKAHAATSHLEGISWEVLVVNEP IVN--AFCLPAGKI 287
Os_OMA1 DRWVTESRDRGKARGAQPETRHLDGLNWEVIVVRDDLIN--AMCLPGGKI 292
BV_ORF19 -----DKDSRKKHSGAKITINHLEGMNWEIFVVDKPLVE--SSYLLGGKI 241
Sc_OMA1 -----VDNSLIDGIKWEIHVVNDPTASPNAFVLPGGKV 181

At_OMA1 VVFTGLLNHFKSDAEVATVIGHEVGHAVARHVAEGITKNLWFATLQLV-I 336
Os_OMA1 VVFTGLLNHFKTDAEIATVIGHEVGHATARHAAEMI TKNLWFATLQIV-I 341
BV_ORF19 VVYTGLLNHCNSDAELATI IAHQVGHAVARHEAEDSTAFFWLLISLNVIL 291
Sc_OMA1 FIFSSITPICANDDGIATVLAHEFAHQARHTAENLSKAPIYSLIGLV-I 230

At_OMA1 -YQFV-MEDLVNTMSALFLRLPFPSR----- 359
Os_OMA1 -MQFIYMDMINAMSTLLKLPFSR----- 365
BV_ORF19 FKILFTPEESANARSKLLRHPLLOKVKI IQARAPQLLPTICLSLVGL 341
Sc_OMA1 -YTVTGAHAINNILLDGLRMPASR----- 254

At_OMA1 -----KMEIEADYIGLLLASAGYDPRVAPTVEKLG-----KLG 394
Os_OMA1 -----RMEIEADHIGLLVLGAAGYDPRVAPSVEKLG-----KIA 400
BV_ORF19 FSSVFILYYGRKEIEADHIGVLLMASAGYDPRVAPQVYDKLA-----KPL 386
Sc_OMA1 -----QMETEADYIGLMIMSRACFQEQESIKVWERMANFEKQMN 294

At_OMA1 GD-ALGDYLSSTHPSGKKRSLKLLAQANVMEALMIYREVQACRTGVEGFL-- 442
Os_OMA1 GDSTLSNYLSTHPSKKRAQLLRQAKVMDEALRLYREVSSGQ-GTEGFL-- 448
BV_ORF19 GD---WNCLATHPFARMRAKLLARADVMEADKIYNEVVAGR-AIQGLQ--- 431
Sc_OMA1 CGVVNMEFLSTHPASTRIENMSKWLPRANEIYEQSDCSSMGNYKSF 345

```

File S3. Multiple alignment of amino acid sequences of OMA1-homologous proteins from Arabidopsis (At\_OMA1, At5g51740), rice (Os\_OMA1, Os02g0735100), sugar beet (bvORF19, this study), and yeast (Sc\_OMA1, S000001795). Position of the Zn<sup>2+</sup> binding motif is shown by a horizontal line. The amino acid sequences were aligned using ClustalW (<http://clustalw.ddbj.nig.ac.jp/index.php?lang=ja>). The identity of amino acid sequences between bvORF19 and yeast OMA1 is 17%. The E-value obtained from a BLAST search using bvORF19 as a query is 1e-12 for yeast OMA1.

STE24  
 Candida\_STE24  
 Aspergillus\_STE24  
 Coccidioides  
 Neurospora  
 OsSTE24  
 HvSTE24  
 ATSTE24  
 Homo\_STE24  
 Mus\_STE24  
 Bos\_STE24  
 Gallus\_STE24  
 Xenopus\_STE24  
 Tetraodon\_STE24  
 Strongylocentrotus\_STE24  
 Drosophila  
 AtCpMPL  
 OsCpMPL  
 Synechocystis  
 Crocosphaera  
 Anabaena  
 Thermosynechococcus  
 Synechococcus  
 Streptomyces  
 Mycobacterium  
 Trichodesmium  
 htpX  
 Haemophilus  
 Desulfitobacterium  
 Nitrobacter  
 Methanosarcina  
 Wolinella  
 Photobacterium  
 a-proteobacterium  
 Nitrococcus  
 Pseudomonas  
 Azotobacter  
 Chromobacterium  
 Bordetella  
 Flavobacterium  
 Ustilago  
 Cryptococcus  
 Omalp  
 Candida  
 MRPRP-1  
 Mus  
 Pstrongylocentrotus  
 Gibberella  
 Aspergillus  
 AtMPL  
 OsMPL  
 ORF19  
 yfgC

EI TAVLAHEI GHWQKNE IVNMVIFS QLHTFLIFSL  
 ETVAVLAHEI GHWKLNE LPKMITMMQGHFLIFSL  
 EVVAVLSHEL GHWSLGH TTKLFAIAQSHMFYIFAL  
 EVVAVLSHEL GHWSLGH TTKLFGIAQFHMFYIFAL  
 EVVAVLAHEL GHWKLGH TTSLFGISQAHFFAIFSL  
 EIVSVIAHEL GHWKLNE TVYSFVAVQLLMFLQFGG  
 EIVSVLAHEL GHWKLNE TAYSFVAVQLLTFMQFGG  
 EIVAVIAHEL GHWKLNE TTYSFIAVQILAFQLQFGG  
 EVLAVLGHEL GHWKLGH TVKNI IISQMNSFLCFFL  
 EILAVLGHEL GHWKLGH TVKNI IISQMNSFLCFFL  
 EVLAVLAHEL GHWKLGH NLKNI IISQVNL LCLFL  
 EVLAVLGHEL GHWKLGH TVKNI IIMQVHLFLMFLV  
 ELQAVLAHEL GH LKCDHGVWLT FANILT - - LGAYT  
 ELQAVLAHEL GH LKCDHGVWLT FANILT - - MGAYS  
 EI QAVMAHEL GH LKCEHGVYLT LANIMV - - LAAGL  
 EI QGVMAHEL GH LKCEHGVYLT LANIMV - - LGASL  
 EI QAVIAHEL GH LKCDHGVYLT PVNLLV - - LAASA  
 ELQAVLAHEL GH LKCEHGVYLT IANLLL - - FAASQ  
 EI QAVIAHEL GH LKCDHGVYLT MANLLM - - LSTSL  
 EMRAVIGHEV GH ALSGH SVYRT ILLFLTSLALRVA  
 EMRFVMGHEL GH ALSGH AVYRT MMMHLRLARSFG  
 ELKTVLAHEL GH IKCGH PILLNQMA TWAMG IASAIT  
 EAEAVIAHEI SH IANGDMVTMT LIQGVVNTFVIFI  
 EAEAVLAHEI SH ISNGDMVTMALLQGV LNTFVIFL  
 ELEGVLAHEI MAHIKNRD ILI STLAA - VMAGVI TTL  
 ELAGVIAHEI LAHIK HHD TLLMTITA - T IAGAI SML  
 ELEAVLAHEI SHVKNRD MAVLT IAS - FLS SVAFYI  
 ELAVVMGHEI AHAIARE GAERLSVSMA SELGRNLI  
 QLAVIGHEI GHVIAQH SNERLSRSQLANAGLELT  
 QLAVVMGHEI GHVIAEH GNERMSIATL SNLGLQIT  
 QLAVIGHEV GHVLA GH ANERL STNAA TQTGLDLL  
 EIAAVMGHEI AHALREH GREAMSKAYGVQVASQ - I  
 EIAAVMGHEI AHALREH GREALSKAYAVEMAKQGA  
 ELAAVIGHEI SHALREH TRENMSQAYAQMGGLGLV  
 ELAAVIGHEI AHALREH ARERV SQQMATSI GLSVL  
 GLAMILGHEI AHALANE GAQRMTAQGGQ I V G A G  
 GLATVIGHEI AHQVARE SA EKMSGYK VLLFGTFL  
 GLATVIGHEI AHQVARE PAERMSSMKVLFALG LLL  
 GIATVLAHEI FAHQVARE TAENLSKAPIYSLGLGLV  
 GIATVLSHEI FAHQVARE TAENLSKAPLYSLGLIIL  
 QLSFLLGHEI AHAVLGH AA EKAGMVHLDFLGMIF  
 QLSFLLGHEI AHAVLGH AA EKASLVHLDFLGMIF  
 QLGTVLAHEI MAHVVLNE SAEMASFFEFDFL FMIVV  
 ALAAVIGHEI AHNTA SHASERL SA AWVGNLTA GSL  
 GLAAVIGHEI AHVVAHEI TGERMSN - - - NFVTMGV  
 EVATVIGHEV GHAVARE VA EGI TKNLWFAI - LQLV  
 EIAVIGHEV GHAIARE AAEMI TKNLWFWI - LQIV  
 ELATIIAHQV GHAVARE EAEDSTA FFWLLI SLNVI  
 QLAVMAHEI SHVTQREI LARAMEDQQR SAPLTVWG

File S4. See next page for the legend.

File S4. Multiple alignment of ~35 amino acid residues surrounding the Zn<sup>2+</sup> binding motif of peptidase M48 proteins, a protein family to which yeast OMA1 belongs. The position of the Zn<sup>2+</sup> binding motif is shown by a horizontal line. Note that only bvORF19 (indicated by ORF19 in the alignment) contains HQxxH, instead of HEXxH that is present in the other members. Data from: STE24, *Saccharomyces cerevisiae*, CAA89647; *Candida*\_STE24, *Candida albicans*, XP\_713382; *Aspergillus*\_STE24, *Aspergillus fumigatus*, XP\_752066; *Coccidioides*, *Coccidioides immitis*, EAS28348; *Neurospora*, *Neurospora crassa*, CAC28689; OsSTE24, *Oryza sativa*, Os02g0680400; HvSTE24, *Hordeum vulgare*, CAL26913; ATSTE24, *Arabidopsis thaliana*, At4g01320; Homo\_STE24, *Homo sapiens*, NP\_005848; Mus\_STE24, *Mus musculus*, NP\_766288; Bos\_STE24, *Bos taurus*, XP\_882083; Gallus\_STE24, *Gallus gallus*, XP\_417720; Xenopus\_STE24, *Xenopus laevis*, AAH82484; Tetradon\_STE24, *Tetraodon nigroviridis*, CAG10466; *Strongylocentrotus*\_STE24, *Strongylocentrotus purpuratus*, XP\_001177479; *Drosophila*\_STE24, *Drosophila melanogaster*; AtCpMPL, *Arabidopsis thaliana*, At3g27110; OsCpMPL, *Oryza sativa*, Os01g0970700; *Synechocystis*, *Synechocystis* sp. PCC 6803, NP\_440889, *Crocospaera*, *Crocospaera watsonii*, NP\_681428; *Anabaena*, *Anabaena variabilis*, YP\_321952; *Thermosynechococcus*, *Thermosynechococcus elongatus*, NP\_681428; *Synechococcus*, *Synechococcus* sp. JA-3-3Ab, YP\_473883; *Streptomyces*, *Streptomyces avermitilis*, NP\_826653; *Mycobacterium*, *Mycobacterium tuberculosis*, NP\_216493; *Trichodesmium*, *Trichodesmium erythraeum*, YP\_721635; htpX, *Escherichia coli*, AAA62779; *Haemophilus*, *Haemophilus influenzae*, NP\_438878; *Desulfitobacterium*, *Desulfitobacterium hafniense*, ZP\_01369144; *Nitrobacter*, *Nitrobacter hamburgensis*, YP\_575597; *Methanosarcina*, *Methanosarcina mazei*, NP\_635158; yfgC, *Escherichia coli*, AAC75547; *Desulfovibrio*, *Desulfovibrio desulfuricans*, YP\_386603; *Wolinella*, *Wolinella succinogenes*, NP\_907498; *Photobacterium*, *Photobacterium profundum*, YP\_132334; a-proteobacterium, a-proteobacterium HTCC2255, ZP\_01448796; *Nitrococcus*, *Nitrococcus mobilis*, ZP\_01126393; *Pseudomonas*, *Pseudomonas aeruginosa*, NP\_253322; *Azotobacter*, *Azotobacter vinelandii*, ZP\_00416091; *Chromobacterium*, *Chromobacterium violaceum*, NP\_899823; *Bordetella*, *Bordetella bronchiseptica*, NP\_888655; *Flavobacterium*, *Flavobacterium* sp. MED217, ZP\_01061128; *Ustilago*, *Ustilago maydis*, XP\_757961; *Cryptococcus*, *Cryptococcus neoformans*, XP\_569916; Oma1p, *Saccharomyces cerevisiae*, P36163; *Candida*, *Candida glabrata*, XP\_446463; MPRP-1, *Homo sapiens*, BAC79381; *Mus*, *Mus musculus*, NP\_080185; *Strongylocentrotus*, *Strongylocentrotus purpuratus*, XP\_799173; *Gibberella*, *Gibberella zeae*, XP\_390368; *Aspergillus*, *Aspergillus nidulans*, XP\_659454; AtMPL, *Arabidopsis thaliana*, At5g51740 (AtOMA1); OsMPL, *Oryza sativa*, Os02g0735100 (OsOMA1). Multiple alignment was done by using ClustalX (<http://www.clustal.org/clustal2/>).

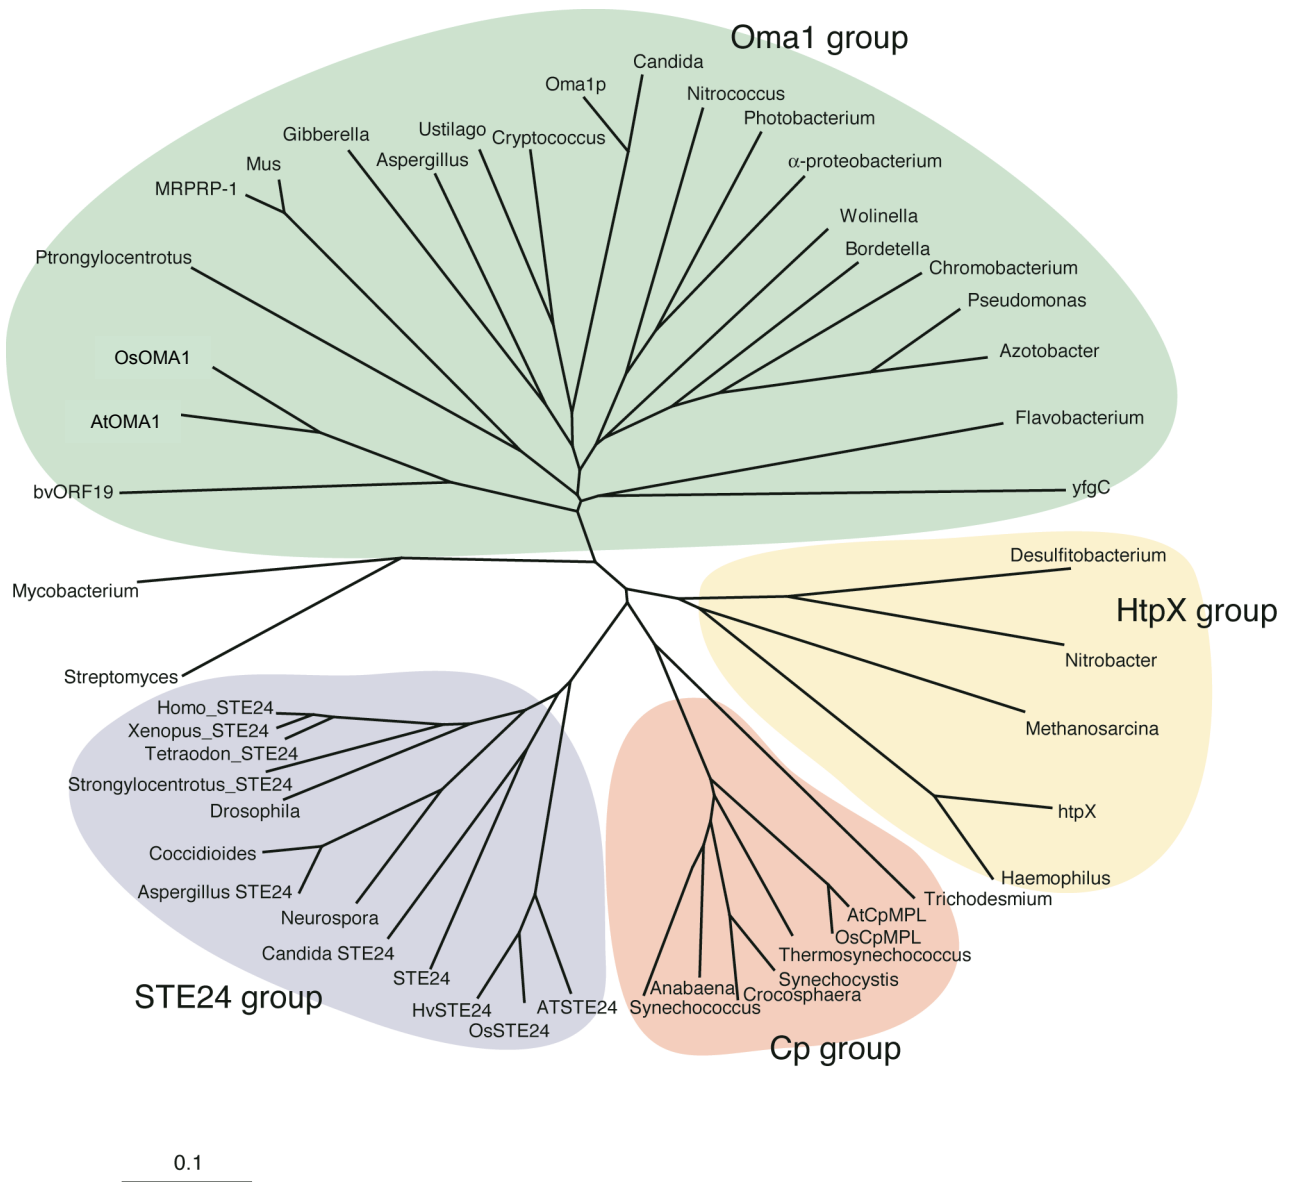

File S5. A Neighbor-Joining tree of peptidase M48 family proteins (see File S4). The tree was drawn by TreeView (<http://taxonomy.zoology.gla.ac.uk/rod/treeview.html>) based on the alignment shown in File S4. The sequence data are grouped into four clades. Note that *bvORF19*, as well as its homologous sequences in *Arabidopsis*, rice, and yeast *OMA1* (see File S3), belongs to a single group, tentatively named the Oma1 group.
