# Supplementary material
Source: PubMed Central journal article supplement (PMC3512143)
Supplement: 7f5eb5bb340ee913b3d117b55533f8aa_genetics.112.145409-5.pdf [file 7f5eb5bb340ee913b3d117b55533f8aa_genetics.112.145409-5.pdf]

TABLE S1 Primers used in this study

| Purposes                                            | Name of primers     | Nucleotide sequences                     |
|-----------------------------------------------------|---------------------|------------------------------------------|
| cDNA sequencing of bvORF18/19/20/21                 | D-Fw                | 5'-TGCACCCAGTAGTTGTGCCA-3'               |
|                                                     | D-Rv                | 5'-GCAAGAGAGGATGCCTTAAG-3'               |
|                                                     | Gre                 | 5'-GATGCGCGATAATTGTAGCC-3'               |
| Generating hybridization probe of bvORF19 3' UTR    | 3'-FW               | 5'-AGCTTGCAAAGCCACTGGGCGA-3'             |
|                                                     | 3'-RV               | 5'-GGAACCAAATTAGATTGAATTAACAAGTGG-3'     |
| bvORF16-GFP construction                            | GFP-ORF16-FW        | 5'-CCGTGACATGAAATGGAGCTGCGTTG-3'         |
|                                                     | GFP-ORF16-RV        | 5'-GGCCATGGCAGATAGTTCTTTTCCAATTGG-3'     |
| bvORF20-GFP construction                            | GFP-ORF20-FW        | 5'-GGGTCGACATGGCATGGTACAGTAAATTC-3'      |
|                                                     | GFP-ORF20-RV        | 5'-GGCCATGGATTTTGCAGACCCAAATAACCC-3'     |
| Amplification of bvORF19 for transgene construction | attB1-ORF19 prom    | 5'-AAAAGCAGGCTTTAGATCTGCCGTTGCACAACG-3'  |
|                                                     | orf19-genomic 3' rv | 5'-AGAAAGCTGGGTGTATCTGGGACCTGGATTGAG-3'  |
| Amplification of bvORF20 for transgene construction | attB1-ORF20 prom    | 5'-AAAAGCAGGCTGTAACAGAGGGTTCAAATTGCGG-3' |
|                                                     | orf20-genomic3'rv   | 5'-AGAAAGCTGGGTGGTCCTGGATTGAGGGTTAAC-3'  |
| Amplification of bvORF21 for transgene construction | attB1-ORF21 prom    | 5'-AAAAGCAGGCTGAACCTGAACTGAACTTATTGG-3'  |
|                                                     | orf21-genomic3'rv   | 5'-AGAAAGCTGGGTTACCTGGGTCCCTGGATTAAG-3'  |
| Detection of bialaphos-resistance gene              | BAR5                | 5'-CGAGACAAGCACGGTCAACTTC-3'             |
|                                                     | BAR6                | 5'-AAACCCACGTCATGCCAGTTC-3'              |
