# Supplementary material
Source: PubMed Central journal article supplement (PMC3512143)
Supplement: 137ebb878ecc91a40bb8d483bb02d543_genetics.112.145409-10.pdf [file 137ebb878ecc91a40bb8d483bb02d543_genetics.112.145409-10.pdf]

CACTTTTGAGCAACTCACAATTTTATATATACATTACAAGTAATTAATAAATAAAGTATTA 100440  
TATGGGTAACTTATACATTGATAAGGGTAACTAATAAGATAATTTGAGCAACTAATGTTT 100380  
TTATATGTACATAACAAGTAAATAATAACACACGTTACATTGACTTGATTACACAAAGGA 100320  
 TAACTTATACATTGATAAAAGACAACTAATAAGATAAGTTGAGCAACTAAAGATTTTACAT 100260  
 TGACTTGGTTAGATAAAAGGATAACTTATAGATAGATAAAAGGTAACTAATAAGATAATTTG 100200  
AGCAACTAACAATTTTATATATACATTACAAGTAATTAATAACAAAAAGTAAAGTATTA 100140  
TATGGATAATTAAAAAAGTAAATATTATATGAGGAACTATGCAAATTCCTACTA 100080  
 ATGTACATTGACTTGGTTCAGTTAAACTTGTGGAAACATGTAATCCTTGTAATCCTAGTGG 100020  
 AGTAATCTATTTACTTTTAGATTAACTTAAGCATAGTTTGGGATGGCCTATATGATGTTA 99960  
 ATAAGACATCACAACTAATCTCCAACGTTGTTTATATTAATGTGCATGTCATATGAAAAT 99900  
 GTCATAGACAAGTTCCAATAAGTCTAGATATGTCAAATTTCAGTTTACTAAATTATTATT 99840  
 GATTTATGTTCTTGTGGTCCAGTAATCTACAATAGAATGGAAGATGAAGAATTTGCTCC 99780  
 AACTCCTTGCATTGATGCAACTCCAACTCCTTGTGTTGATACAACTCCAACTAATGCTAC 99720  
 TCAAACTTCTAATGCTCAAACAACAAGATCCACATTCACTCCTCGTCCATGCTACACACC 99660  
 TAGAGGTTCAAAGAATGGATCCCTTGTGCCTCCTGAGTTAAACCTACTGTGGGTAT 99600  
 R G S K E W I P C C P P E L K P T V G M  
  
 GCCTTTTGATTCTCTTGTGATGGTATTGAGTTTTATAAAGCTTATGCTCGGTTTTGTGG 99540  
 P F D S L V D G I E F Y K A Y A R F C G  
  
 TTTTGTGGAAAGATTGGCTACTGAGAAAAAAGATAAGGATGGTCATGTTTACTTGAAGTA 99480  
 F V E R L A T E K K D K D G H V Y L K Y  
  
 TATTTATTGTAATAACAAGGATTTAAAGAAGATGGTGAGAGTAAAGCAAAGAGTAAACC 99420  
 I Y C N K Q G F K E D G E S K A K S K P  
  
 TATAACATGCTCTAGTTCTCGTAAAGAAGTGAAATCGTGCTGGTTGTCAAGCAAGGAT 99360  
 I T C S S S R K R S V N R A G C Q A R I  
  
 AGGTTTGGAGAAAACGTAGTGATGGAAAATTCATGGTATATCTTTTTTCATGAATCGCATAA 99300  
 G L R K R S D G K F M V Y L F H E S H N  
  
 CCATGTATTTGCCACTCCCAAAGCATGCATTTTCTTAAAAATTCTCGAACTTGACTCT 99240  
 H V F A T P K S M H F L K N S R N L T L  
 TGCTCACAAGAAGTTCATATTTGATAATTCAAGATTGAATGTTGGACCAAACAATCTTT 99180  
 A H K K F I F D N S R L N V G P N K S F  
  
 TAGATTGATAAAAGAGCATGTAGGAGGATATGAGAATGTAGGGGCGTCATTGGTTGATTT 99120  
 R L I K E H V G G Y E N V G A S L V D F

TAAGAACTTCAGTCGAGATGTTAAAGCTTACATACAAGATGTTGATGCCGACATGTTTGT 99060  
 K N F S R D V K A Y I Q D V D A D M F V

AAATAATTTCAAAGAAAAGGCAACTAGTAGTGGTGGAGGGTTTTTCTTTGACTATTGTGG 99000  
 N N F K E K A T S S G G G F F F D Y C G  
 D

ATGAAAATCGACATTTGACTAGAGTTTTTTGGGCGGATGCCATTAGTAGGAAAAACTATT 98940  
 \*  
 E N R H L T R V F W A D A I S R K N Y S

CTCTTTTTGGTGATATGGTATCATTGATACAACCTTTTGATACCAATAAATATTGTATGG 98880  
 L F G D M V S F D T T F D T N K Y C M V

TTCTTGCCCCATTTACTGGAGTTGATCATCATGAAAATGTGTTACTTTTTGGTATGGGCC 98820  
 L A P F T G V D H H G K C V T F G M G L

TACTTGCAAAGGAAGATATAGAATCTTTCGTTTGGTTGTTTGAATGTTTTTTAAAAGCTA 98760  
 L A K E D I E S F V W L F E C F L K A M

TGGGTAATTGTCAACCTACTTGTCTCATTACTGATCAAGATGCAGCAATGAAACAAGCAA 98700  
 G N C Q P T C L I T D Q D A A M K Q A I

TTGAAAAAGTTTTCTTTAAGACAATTCATAGACTTTGCGTGTGGCATATCATGAAAAAAG 98640  
 E K V F F K T I H R L C V W H I M K K V

TGCCGGTAAAAGTAGGTCCAGATATGTGTAGAACAACGAAGTTTCTTGAGAAATTGAATG 98580  
 P V K V G P D M C R T T K F L E K L N A

CTGTTGTTTGGGATAGAGACCTTGAGCCAGATGAATTTGACAAAGGGTGAATTCTGTGA 98520  
 V V W D R D L E P D E F D K G W N S V M

TGCGTGAATTTGGCTTAGAAGATGATGGGTGGTTTACTGATATGTTTAAACATAAGACATA 98460  
 R E F G L E D D G W F T D M F N I R H M

TGTGGATCCCTTCTTACTTTTCGAAATCTTTTCATGGGTGGTATTTTGAGGTCCACACAGA 98400  
 W I P S Y F R N L F M G G I L R S T Q I

TTTCAGAGTCTGAGAACAACCTTTTCACTTTGTTTACAAATGCAAATCTTCTTCTAGTTG 98340  
 S E S E N N F F T L F T N A N L L L V E

AGTTATGGTTTTCCGGATAGAATCAGCTATGGATGCTCAAAGACATGCCCAAAACAAACTCA 98280  
 L W F R I E S A M D A Q R H A Q N K L N

ACTCAGATTCTAAGAATTCCATGCCTCGTCTTATTACTCCTCCTTTAGAGAAGCATG 98220  
 S D S K N S M P R L I T P L P L E K H A

CATCTCTTGTTTTACACACACAATATGTTCTACAAATTTTCAGAGAGAGTTTTCAAATGCAA 98160  
 S L V Y T H N M F Y K F Q R E F Q N A I

TTTTTAATTGTGGGGTTTTACAAAGTACAAATAGAGGAAGCTGTTGAGGAGTTTGAAGTTG 98100  
 F N C G V Y K V Q I E E A V E E F E V A

CAGATAATACAAGGAAGAAAACATATCATGTGACTTTTTATTCTGATTCTCATGATTGTT 98040  
 D N T R K K T Y H V T F I P D S H D C F

TTTGCTCTTGTAAGATGTTTGAATCCATGGGAATATTATGTCGGCATGTGCTTTTTGTGA 97980  
 C S C K M F E S M G I L C R H V L F V I

TAAAAGGGAAGTTTTTGGACTGAAATTCCAGAGCAACATATATTGCATCGGTGGACTAAAG 97920  
 K G K F L T E I P E Q H I L H R W T K D

ATGCTTCAAAAAAGCCCATTTTTCGACTTTTTGTGAGGACTTTGATGGTATAGAAATAAATA 97860  
 A S K K P I F D F C E D F D G I E I N K

AGAAGAAAAAAGTTGTTGGGGATCTTTGGTCGAAATTCTTCTCATGTGTAAGCCTTGTTG 97800  
 K K K V V G D L W S K F F S C V S L V E

AAAATAACACAGACCATCTTGAGTTATTATTGGAAAGGTTATCTGCTTTTTGAGGAGGAAA 97740  
 N N T D H L E L L L E R L S A F E E E M

TGAAACCTGGAAAAGAAAATGTTGAGCAACAATCTAAAGACAAGCATATTGAGTTGTTTCG 97680  
 K P G K E N V E Q Q S K D K H I E L F V

TTGGTTCTAATATAGTATCAGGTGGTATACTTCTCCAAACAAGTCTTCAAACAAAGGAA 97620  
 G S N I V S G G I L P P N K S S N K G S

GTGGTACGGGAAAGAGAAAAGAAAAGTGATCAAGAGATAGCCATTGAAGCAAGCAACAAAA 97560  
 G T G K R K K S D Q E I A I E A S N K K

AGGAGAGACTGTGTAGATCATGTGGTCAACTTTCAACTCATGATAGTCGTAATTGTCTCTG 97500  
 E R L C R S C G Q L S T H D S R N C P D

ATAAAAAGAAAAACCTAGAATGAGGTAAGTTTAGAATAATATATTATTTATACATCACTA 97440  
 K K K N L E \*

TCAAATGAGAGTTTCTTTTCATTCATTTATTAATAAATTATTTATCACAATTTTTGTTTC 97380  
 TTTTGCAGTTACATGGAGGATTGTGATACATGGTGATGACAAGAATCATGATGATCAAAA 97320  
 GGGGAGCAAGCAGATTTTACATCACACTTTTTGGGGAATTTTTGTTTGGTTTTATAAAGT 97260  
 GTTACCTACAAAAAATAAAGTGTATGTGTTCAAAGGAGCTGGCAAACATTTAAAAATTAT 97200  
 GGATTATTCTTTTGAAACGATTTCACTTGAAGGATTTTGATGGCTTAAGCACACTTTTGC 97140  
 AGTCTATCTCAAAAATTGTAGGTTTTGTGAAACTATATTCCATGGACACTGCAATTGATA 97080  
 TTGTAATTGGAAAGAAGCTTGATTATTCTGTAAAGTTTGCAAGTTATAACTTTTTCTTCTT 97020  
 AGGTTGGAAAGAAGTAGATTTTGTAACTTTTTTTTTCTTTTACTATTTGAGGTGACTGGAA 96960  
 TCCACCTTTTTGTGTTACCTTTTAGTGCATTCTTTGACTAGGACACTGATTCATTGGTAA 96900  
 TTATTATGTAAAAACCCCTATAAACAGTTACTAAAAAGAAGTTATAGTCAACCATACATT 96840  
 TACGAGAGAGTATTAATCTTTTTAGTTTGATTTTATGTATTATTTTCAAATATCTTTTTA 96780  
 TATGTACATAACAAGTAAATAATTTACACGTTACATTGACTTGATTACACAAAGGATAA 96720  
 CTTATACATTGATAAGGGTAACTAATAAGATAAGTTGAGCAACTAAAGATTTTTACATTG 96660  
 ACTTGGTTAGCCAAAGGATAACTTATAGATAGATAAGGGTAAATAATATGATAATTTGAG 96600  
 CAACTAAACAATTTTATATATACATTACAAGTAATTAATAACAAGAAGTAAAGTATTATA 96540  
TGGATAACTTATAGATAGATAAGGGTAACTAATAAGATAATTTGAGCAACTAACAATTTT 96480  
ATATATACATTACAAGTAATTAATAACAAGAAGTAAAGTATTATATGGATAACTTATAC 96420  
ATTGATAAGGGTAACTAATAAGATAATTTGAGCAACTAACGATTTTATATGTACATAACA 96360  
AGTAAATAATAACACACGTTACATTGACTATCTCCTTTTCATCTTTATCAAATAAAAAATA 96300

FIGURE S2.– Nucleotide sequence of *bvMULE-1*. Numbers of nucleotide residues are coordinated with those of BAC clone 5A3. Two open reading frames that exhibit sequence homology to transposases are indicated with putative translation products. The 115-bp and 111-bp repeated sequences are indicated by single and double lines, respectively.
