# Supplementary material
Source: PubMed Central journal article supplement (PMC3512143)
Supplement: 5870159ae75c11e16907325cbc9b5005_genetics.112.145409-3.pdf [file 5870159ae75c11e16907325cbc9b5005_genetics.112.145409-3.pdf]

File S1. List of gene sequences used for phylogenetic analysis.

| Name of genes  | Label in tree |
|----------------|---------------|
| AtPPR_1g01970* | AT1g01970     |
| AtPPR_1g02060  | AT1g02060     |
| AtPPR_1g02150  | AT1g02150     |
| AtPPR_1g02370  | AT1g02370     |
| AtPPR_1g02420  | AT1g02420     |
| AtPPR_1g03100  | AT1g03100     |
| AtPPR_1g03560  | AT1g03560     |
| AtPPR_1g05600  | AT1g05600     |
| AtPPR_1g05670  | AT1g05670     |
| AtPPR_1g06270  | AT1g06270     |
| AtPPR_1g06580  | AtRFL1        |
| AtPPR_1g06710  | AT1g06710     |
| AtPPR_1g07590  | AT1g07590     |
| AtPPR_1g07740  | AT1g07740     |
| AtPPR_1g08610  | AT1g08610     |
| AtPPR_1g09680  | AT1g09680     |
| AtPPR_1g09820  | AT1g09820     |
| AtPPR_1g09900  | AT1g09900     |
| AtPPR_1g10270  | AT1g10270     |
| AtPPR_1g10910  | AT1g10910     |
| AtPPR_1g11630  | AT1g11630     |
| AtPPR_1g11710  | AT1g11710     |
| AtPPR_1g11900  | AT1g11900     |
| AtPPR_1g12300  | AtRFL2        |
| AtPPR_1g12620  | AtRFL3        |
| AtPPR_1g12700  | AtRFL4        |
| AtPPR_1g12770  | AT1g12770     |
| AtPPR_1g13040  | AT1g13040     |
| AtPPR_1g13630  | AT1g13630     |
| AtPPR_1g13800  | AT1g13800     |
| AtPPR_1g15480  | AT1g15480     |
| AtPPR_1g16830  | AT1g16830     |
| AtPPR_1g18900  | AT1g18900     |
| AtPPR_1g19290  | AT1g19290     |
| AtPPR_1g19520  | AT1g19520     |
| AtPPR_1g20300  | AT1g20300     |
| AtPPR_1g22960  | AT1g22960     |
| AtPPR_1g26460  | AT1g26460     |
| AtPPR_1g26500  | AT1g26500     |
| AtPPR_1g28020  | AT1g28020     |
| AtPPR_1g30610  | AT1g30610     |
| AtPPR_1g31790  | AT1g31790     |
| AtPPR_1g31840  | AT1g31840     |
| AtPPR_1g43010  | AT1g43010     |
| AtPPR_1g51965  | AT1g51965     |
| AtPPR_1g52620  | AT1g52620     |
| AtPPR_1g52640  | AT1g52640     |
| AtPPR_1g53330  | AT1g53330     |
| AtPPR_1g55630  | AT1g55630     |
| AtPPR_1g55890  | AT1g55890     |
| AtPPR_1g60770  | AT1g60770     |
| AtPPR_1g61870  | AT1g61870     |

|               |           |
|---------------|-----------|
| AtPPR_1g62350 | AT1g62350 |
| AtPPR_1g62590 | AtRFL5    |
| AtPPR_1g62670 | AtRFL6    |
| AtPPR_1g62680 | AtRFL7    |
| AtPPR_1g62720 | AtRFL8    |
| AtPPR_1g62910 | AtRFL9    |
| AtPPR_1g62930 | AtRFL11   |
| AtPPR_1g63070 | AtRFL12   |
| AtPPR_1g63080 | AtRFL13   |
| AtPPR_1g63130 | AtRFL14   |
| AtPPR_1g63150 | AtRFL15   |
| AtPPR_1g63330 | AtRFL16   |
| AtPPR_1g63400 | AtRFL17   |
| AtPPR_1g64100 | AtRFL18   |
| AtPPR_1g64580 | AtRFL19   |
| AtPPR_1g64585 | AT1g64585 |
| AtPPR_1g66345 | AT1g66345 |
| AtPPR_1g68980 | AT1g68980 |
| AtPPR_1g69290 | AT1g69290 |
| AtPPR_1g71060 | AT1g71060 |
| AtPPR_1g71210 | AT1g71210 |
| AtPPR_1g73400 | AT1g73400 |
| AtPPR_1g73710 | AT1g73710 |
| AtPPR_1g74580 | AT1g74580 |
| AtPPR_1g74750 | AT1g74750 |
| AtPPR_1g74850 | AT1g74850 |
| AtPPR_1g74900 | AT1g74900 |
| AtPPR_1g76280 | AT1g76280 |
| AtPPR_1g77360 | AT1g77360 |
| AtPPR_1g77405 | AT1g77405 |
| AtPPR_1g79080 | AT1g79080 |
| AtPPR_1g79490 | AT1g79490 |
| AtPPR_1g79540 | AT1g79540 |
| AtPPR_1g80150 | AT1g80150 |
| AtPPR_1g80270 | AT1g80270 |
| AtPPR_1g80550 | AT1g80550 |
| AtPPR_1g80880 | AT1g80880 |
| AtPPR_2g01360 | AT2g01360 |
| AtPPR_2g01390 | AT2g01390 |
| AtPPR_2g01740 | AT2g01740 |
| AtPPR_2g01860 | AT2g01860 |
| AtPPR_2g02150 | AT2g02150 |
| AtPPR_2g06000 | AT2g06000 |
| AtPPR_2g13420 | AT2g13420 |
| AtPPR_2g15630 | AT2g15630 |
| AtPPR_2g15820 | AT2g15820 |
| AtPPR_2g15980 | AT2g15980 |
| AtPPR_2g16880 | AT2g16880 |
| AtPPR_2g17033 | AT2g17033 |
| AtPPR_2g17140 | AT2g17140 |
| AtPPR_2g17525 | AT2g17525 |
| AtPPR_2g17670 | AT2g17670 |
| AtPPR_2g18520 | AT2g18520 |
| AtPPR_2g18940 | AT2g18940 |

|               |           |
|---------------|-----------|
| AtPPR_2g19280 | AT2g19280 |
| AtPPR_2g20710 | AT2g20710 |
| AtPPR_2g26790 | AT2g26790 |
| AtPPR_2g27800 | AT2g27800 |
| AtPPR_2g28050 | AT2g28050 |
| AtPPR_2g30100 | AT2g30100 |
| AtPPR_2g30780 | AT2g30780 |
| AtPPR_2g31400 | AT2g31400 |
| AtPPR_2g32230 | AT2g32230 |
| AtPPR_2g32630 | AT2g32630 |
| AtPPR_2g35130 | AT2g35130 |
| AtPPR_2g36240 | AT2g36240 |
| AtPPR_2g37230 | AT2g37230 |
| AtPPR_2g38420 | AT2g38420 |
| AtPPR_2g39230 | AT2g39230 |
| AtPPR_2g40240 | AT2g40240 |
| AtPPR_2g41720 | AT2g41720 |
| AtPPR_2g48000 | AT2g48000 |
| AtPPR_3g02490 | AT3g02490 |
| AtPPR_3g02650 | AT3g02650 |
| AtPPR_3g04130 | AT3g04130 |
| AtPPR_3g04760 | AT3g04760 |
| AtPPR_3g06430 | AT3g06430 |
| AtPPR_3g06920 | AT3g06920 |
| AtPPR_3g07290 | AT3g07290 |
| AtPPR_3g09060 | AT3g09060 |
| AtPPR_3g09650 | AT3g09650 |
| AtPPR_3g13150 | AT3g13150 |
| AtPPR_3g13160 | AT3g13160 |
| AtPPR_3g14580 | AT3g14580 |
| AtPPR_3g15200 | AT3g15200 |
| AtPPR_3g15590 | AT3g15590 |
| AtPPR_3g16010 | AT3g16010 |
| AtPPR_3g16710 | AtRFL20   |
| AtPPR_3g16890 | AT3g16890 |
| AtPPR_3g18020 | AT3g18020 |
| AtPPR_3g18110 | AT3g18110 |
| AtPPR_3g22470 | AtRFL21   |
| AtPPR_3g22670 | AT3g22670 |
| AtPPR_3g23020 | AT3g23020 |
| AtPPR_3g25210 | AT3g25210 |
| AtPPR_3g29290 | AT3g29290 |
| AtPPR_3g42630 | AT3g42630 |
| AtPPR_3g46610 | AT3g46610 |
| AtPPR_3g46870 | AT3g46870 |
| AtPPR_3g48250 | AT3g48250 |
| AtPPR_3g48810 | AT3g48810 |
| AtPPR_3g49240 | AT3g49240 |
| AtPPR_3g49730 | AT3g49730 |
| AtPPR_3g53170 | AT3g53170 |
| AtPPR_3g53700 | AT3g53700 |
| AtPPR_3g54980 | AT3g54980 |
| AtPPR_3g56030 | AT3g56030 |
| AtPPR_3g59040 | AT3g59040 |

|               |           |
|---------------|-----------|
| AtPPR_3g60050 | AT3g60050 |
| AtPPR_3g60960 | AT3g60960 |
| AtPPR_3g60980 | AT3g60980 |
| AtPPR_3g61360 | AT3g61360 |
| AtPPR_3g61520 | AT3g61520 |
| AtPPR_3g62470 | AT3g62470 |
| AtPPR_3g62540 | AT3g62540 |
| AtPPR_4g01400 | AT4g01400 |
| AtPPR_4g01570 | AT4g01570 |
| AtPPR_4g01990 | AT4g01990 |
| AtPPR_4g02820 | AT4g02820 |
| AtPPR_4g04790 | AT4g04790 |
| AtPPR_4g11690 | AT4g11690 |
| AtPPR_4g14190 | AT4g14190 |
| AtPPR_4g16390 | AT4g16390 |
| AtPPR_4g17618 | AT4g17618 |
| AtPPR_4g17910 | AT4g17910 |
| AtPPR_4g18975 | AT4g18975 |
| AtPPR_4g19440 | AT4g19440 |
| AtPPR_4g19900 | AT4g19900 |
| AtPPR_4g20090 | AT4g20090 |
| AtPPR_4g20740 | AT4g20740 |
| AtPPR_4g21170 | AT4g21170 |
| AtPPR_4g21190 | AT4g21190 |
| AtPPR_4g21705 | AT4g21705 |
| AtPPR_4g21880 | AT4g21880 |
| AtPPR_4g26680 | AT4g26680 |
| AtPPR_4g28010 | AT4g28010 |
| AtPPR_4g30825 | AT4g30825 |
| AtPPR_4g31850 | AT4g31850 |
| AtPPR_4g34830 | AT4g34830 |
| AtPPR_4g35850 | AT4g35850 |
| AtPPR_4g36680 | AT4g36680 |
| AtPPR_4g38150 | AT4g38150 |
| AtPPR_4g39620 | AT4g39620 |
| AtPPR_5g01110 | AT5g01110 |
| AtPPR_5g02830 | AT5g02830 |
| AtPPR_5g02860 | AT5g02860 |
| AtPPR_5g04810 | AT5g04810 |
| AtPPR_5g06400 | AT5g06400 |
| AtPPR_5g08315 | AT5g08315 |
| AtPPR_5g09450 | AT5g09450 |
| AtPPR_5g10690 | AT5g10690 |
| AtPPR_5g11310 | AT5g11310 |
| AtPPR_5g12100 | AT5g12100 |
| AtPPR_5g13770 | AT5g13770 |
| AtPPR_5g14080 | AT5g14080 |
| AtPPR_5g14770 | AT5g14770 |
| AtPPR_5g14820 | AT5g14820 |
| AtPPR_5g15010 | AT5g15010 |
| AtPPR_5g15280 | AT5g15280 |
| AtPPR_5g15980 | AT5g15980 |
| AtPPR_5g16420 | AT5g16420 |
| AtPPR_5g16640 | AtRFL23   |

|                             |           |
|-----------------------------|-----------|
| AtPPR_5g18390               | AT5g18390 |
| AtPPR_5g18475               | AT5g18475 |
| AtPPR_5g18950               | AT5g18950 |
| AtPPR_5g21222               | AT5g21222 |
| AtPPR_5g24830               | AT5g24830 |
| AtPPR_5g25630               | AT5g25630 |
| AtPPR_5g27270               | AT5g27270 |
| AtPPR_5g27460               | AT5g27460 |
| AtPPR_5g28460               | AT5g28460 |
| AtPPR_5g38730               | AT5g38730 |
| AtPPR_5g39710               | AT5g39710 |
| AtPPR_5g39980               | AT5g39980 |
| AtPPR_5g40400               | AT5g40400 |
| AtPPR_5g41170               | AtRFL24   |
| AtPPR_5g42310               | At_CRP1   |
| AtPPR_5g43820               | AT5g43820 |
| AtPPR_5g46100               | AT5g46100 |
| AtPPR_5g46580               | AT5g46580 |
| AtPPR_5g46680               | AT5g46680 |
| AtPPR_5g47360               | AT5g47360 |
| AtPPR_5g48730               | AT5g48730 |
| AtPPR_5g50280               | AT5g50280 |
| AtPPR_5g55840               | AT5g55840 |
| AtPPR_5g57260               | AT5g57260 |
| AtPPR_5g59900               | AT5g59900 |
| AtPPR_5g60960               | AT5g60960 |
| AtPPR_5g61370               | AT5g61370 |
| AtPPR_5g61400               | AT5g61400 |
| AtPPR_5g61990               | AT5g61990 |
| AtPPR_5g62370               | AT5g62370 |
| AtPPR_5g64320               | AT5g64320 |
| AtPPR_5g65560               | AT5g65560 |
| AtPPR_5g65820               | AT5g65820 |
| AtPPR_5g66635               | AT5g66635 |
| AtPPR_5g67570               | AT5g67570 |
| AtPPR_1g62910               | AtRFL10   |
| AtPPR_4g26800               | AtRFL22   |
| AtPPR_1g12770               | AtRFL25   |
| AtPPR_1g64585               | AtRFL26   |
| Glyma01g07140 <sup>*2</sup> | GmRFL1    |
| Glyma01g07300               | GmRFL2    |
| Glyma02g09530               | GmRFL3    |
| Glyma05g28430               | GmRFL4    |
| Glyma0679s00210             | GmRFL5    |
| Glyma07g11290               | GmRFL6    |
| Glyma07g11410               | GmRFL7    |
| Glyma07g27410               | GmRFL8    |
| Glyma08g05770               | GmRFL9    |
| Glyma09g07250               | GmRFL10   |
| Glyma09g07290               | GmRFL11   |
| Glyma09g07300               | GmRFL12   |
| Glyma09g28360               | GmRFL13   |
| Glyma09g30160               | GmRFL14   |
| Glyma09g30500               | GmRFL15   |

|                                                  |           |
|--------------------------------------------------|-----------|
| Glyma09g30530                                    | GmRFL16   |
| Glyma09g30620                                    | GmRFL18   |
| Glyma09g30640                                    | GmRFL19   |
| Glyma09g30680                                    | GmRFL20   |
| Glyma09g30720                                    | GmRFL21   |
| Glyma09g30740                                    | GmRFL22   |
| Glyma09g30940                                    | GmRFL23   |
| Glyma09g39260                                    | GmRFL24   |
| Glyma09g39940                                    | GmRFL25   |
| Glyma10g00540                                    | GmRFL26   |
| Glyma14g38270                                    | GmRFL28   |
| Glyma15g24040                                    | GmRFL29   |
| Glyma16g25410                                    | GmRFL30   |
| Glyma16g27600                                    | GmRFL31   |
| Glyma16g27640                                    | GmRFL32   |
| Glyma16g27790                                    | GmRFL33   |
| Glyma16g27800                                    | GmRFL34   |
| Glyma16g28020                                    | GmRFL35   |
| Glyma16g31950                                    | GmRFL36   |
| Glyma16g31960                                    | GmRFL37   |
| Glyma16g32030                                    | GmRFL38   |
| Glyma16g32050                                    | GmRFL39   |
| Glyma16g32420                                    | GmRFL40   |
| Glyma18g46270                                    | GmRFL41   |
| jgi Poptr1 556096 eugene3.00040809 <sup>*3</sup> | PtRFL1    |
| jgi Poptr1 561788 eugene3.00061747               | PtRFL2    |
| jgi Poptr1 561789 eugene3.00061748               | PtRFL3    |
| jgi Poptr1 562052 eugene3.00062011               | PtRFL4    |
| jgi Poptr1 570945 eugene3.00130309               | PtRFL5    |
| jgi Poptr1 570961 eugene3.00130325               | PtRFL6    |
| jgi Poptr1 570963 eugene3.00130327               | PtRFL7    |
| jgi Poptr1 571830 eugene3.00131194               | PtRFL8    |
| jgi Poptr1 573736 eugene3.00190210               | PtRFL9    |
| jgi Poptr1 581077 eugene3.01250075               | PtRFL10   |
| jgi Poptr1 581161 eugene3.127570001              | PtRFL11   |
| jgi Poptr1 594495 eugene3.00640083               | PtRFL12   |
| jgi Poptr1 595453 eugene3.00700094               | PtRFL13   |
| jgi Poptr1 595455 eugene3.00700096               | PtRFL14   |
| jgi Poptr1 595479 eugene3.00700120               | PtRFL15   |
| jgi Poptr1 595494 eugene3.00700135               | PtRFL16   |
| jgi Poptr1 595495 eugene3.00700136               | PtRFL17   |
| jgi Poptr1 595506 eugene3.00700147               | PtRFL18   |
| jgi Poptr1 562855 eugene3.00070793               | PtRFL19   |
| jgi Poptr1 572581 eugene3.00140626               | PtRFL20   |
| AAM52339 <sup>*4</sup>                           | PPR-592   |
| CAD61285                                         | radish-Rf |
| <i>bvORF16</i> <sup>*5</sup>                     | bvORF16   |

\*1 <http://www.plantenergy.uwa.edu.au/applications/ppr/ppr.php> and <http://www.arabidopsis.org/tools/bulk/sequences/index.jsp>

\*2 [http://www.phytozome.net/search.php?show=text&org=Org\\_Gmax\\_v1.1](http://www.phytozome.net/search.php?show=text&org=Org_Gmax_v1.1)

\*3 [http://www.phytozome.net/search.php?show=blast&method=Org\\_Ptrichocarpa\\_v2.2](http://www.phytozome.net/search.php?show=blast&method=Org_Ptrichocarpa_v2.2)

\*4 DDBJ/GenBank/EMBL dataase

\*5 This study
