# Supplementary material
Source: PubMed Central journal article supplement (PMC3512143)
Supplement: a9357e09123b4a969d2d7437220a3f29_genetics.112.145409-16.pdf [file a9357e09123b4a969d2d7437220a3f29_genetics.112.145409-16.pdf]

```

At_OMA1 MSWYRRTKLVFDSLRNINPKILPRSHVTSRINNPIGSSNPSAKFSSIS 50
Os_OMA1 MNYLKNRSRVLRLR-HKPTGCPRLPPSP----PLPQAPPAGYYFTSPS 45
BV_ORF19 MAWYRNSRFVYNALKLNLRSKTFGTIPTPR-----VHSNSSSLFYNQST 44
Sc_OMA1 M-----LRNIIRFKGFG-----KGTSGGFLKPVSF 25

At_OMA1 REVGLRSWTSLGRNTNRIAYNPFLSQPKRYYYVD--RYQVRHFKPRGPGR 98
Os_OMA1 RPEAVRFRVLLRSP-PPFPRPAQAPPSRYFYTSPQRQKVVFNRRRGSR 94
BV_ORF19 NKCSGLFGSAKSGYFNGFKHHQEISSFSGFARRN-----YHGDKTEVSV 88
Sc_OMA1 R----VQLTRCYRYDNGPSYRRFNG-----EYSQKSSFK 56

At_OMA1 WFQNPRTVFTVVLVGVSCLITLIVGNTETIPYTKRTHFILLSKPMEKLLG 148
Os_OMA1 WYHDPKRLTTVVVVSGGAAAVYFGNLETVPYTNRTHLILLSPPLERQLG 144
BV_ORF19 ESWLEKFLVPIGLILTFGILGYPHVHPVVVPYTGKHKHYVLMSTTRENETG 138
Sc_OMA1 SILLDKSSRKYLLALLFGCSLFFYYTHLDKAEVSDRSRFTWVSRPLELTIC 106

At_OMA1 ETQFEQIKKTYQGKILPATHPESIRVRLTAKEVIDALORGLS----NERV 194
Os_OMA1 ESQFNNLKKELGPKILPLHPDSIRVRLTASEVVRVAVHRLAGRHDAFA 194
BV_ORF19 EVEKR-----KIQPATHPDTDRVRSIFOHILESLEREIN----- 172
Sc_OMA1 NYTYKSIWRQTQOEILPQHPLSIKIENIFMKIVEAAYKDPS----- 148

At_OMA1 WSDLGYASTESSLGGG-SDKGVKEMEMAMS--GEDTMTDMKWSKEDQVLD 241
Os_OMA1 ADDASYGDISTDVVIKNHEAGAEDVMLGRSRGNKNASVAAAQRDEEVL 244
BV_ORF19 -----HHELELELE---RDETFKEKTIWKEETVD 198
Sc_OMA1 -----

At_OMA1 DQWIQSRK--KDSKAHAATSHLEGISWEVLVVNEP IVN--AFCLPAGKI 287
Os_OMA1 DRWVTSRDRGKARGAQPETRHLDGLNWEVIVVRDDLIN--AMCLPGGKI 292
BV_ORF19 -----DKDSRKKHSGAKITINHLEGMNWEIFVVDKPLVE--SSYLLGGKI 241
Sc_OMA1 -----VDNSLIDGIKWEIHVVNDPTASPNAFVLPGGKV 181

At_OMA1 VVFTGLLNHFKSDAEVATVIGHEVGHAVARHVAEGITKNLWFATLQLV-I 336
Os_OMA1 VVFTGLLNHFKTDAEIATVIGHEVGHATARHAAEMIKNLWFATLQIV-I 341
BV_ORF19 VVYTGLLNHCNSDAELATI IAHQVGHAVARHEAEDSTAFFWLLISLNVIL 291
Sc_OMA1 FIFSSITPICANDDGIATVLAHEFAHQARHTAENLSKAPIYSLIGLV-I 230

At_OMA1 -YQFV-MEDLVNTMSALFLRLPFSR----- 359
Os_OMA1 -MQFIYMDMINAMSTLLKLPFSR----- 365
BV_ORF19 FKILFTBESANARSKLLRHPLLOKVKI IQARAPQLLPTICLSLVGL 341
Sc_OMA1 -YTVTGAHAINNILLDGLRMPASR----- 254

At_OMA1 -----KMEIEADYIGLLLASAGYDPRVAPTVEKLG-----KLG 394
Os_OMA1 -----RMEIEADHIGLLVLGAAGYDPRVAPSVYEKLG-----KIA 400
BV_ORF19 FSSVFILYYGRKEIEADHIGVLLMASAGYDPRVAPQVYDKLA-----KPL 386
Sc_OMA1 -----QMETEADYIGLMIMSRACFQEQESIKVWERMANFEKQMN 294

At_OMA1 GD-ALGDYLSSTHPSGKKRSLKLLAQANVMEALMIYREVQACRTGVEGFL-- 442
Os_OMA1 GDSTLSNYLSTHPSKKRAQLLRQAKVMEALRLYREVSSGQ-GTEGFL-- 448
BV_ORF19 GD---WNCLATHPFARMRAKLLARADVMEADKIYNEVVAGR-AIQGLQ-- 431
Sc_OMA1 CGVVNMEFLSTHPASTRIENMSKWLPRANEIYEQSDCSSMGNYKSF 345

```

File S3. Multiple alignment of amino acid sequences of OMA1-homologous proteins from Arabidopsis (At\_OMA1, At5g51740), rice (Os\_OMA1, Os02g0735100), sugar beet (bvORF19, this study), and yeast (Sc\_OMA1, S000001795). Position of the Zn<sup>2+</sup> binding motif is shown by a horizontal line. The amino acid sequences were aligned using ClustalW (<http://clustalw.ddbj.nig.ac.jp/index.php?lang=ja>). The identity of amino acid sequences between bvORF19 and yeast OMA1 is 17%. The E-value obtained from a BLAST search using bvORF19 as a query is 1e-12 for yeast OMA1.
