# Supplementary material
Source: PubMed Central journal article supplement (PMC3512143)
Supplement: e13d53f31d9767c9b96cebc503966b38_genetics.112.145409-6.pdf [file e13d53f31d9767c9b96cebc503966b38_genetics.112.145409-6.pdf]

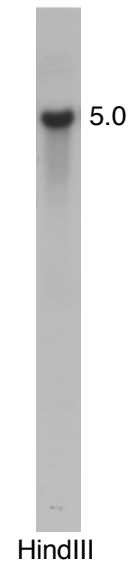

FIGURE S6.– Gel blot analyses using bvORF16 sequence as a probe. Total cellular DNA of NK–198 was used. Size of signal band is given in kbp. DNA fragment for the hybridization probe was generated by PCR using a pair of primers (5'-TGTGTATGCTGTTCTGGTTGA -3' and 5'-AACATCTCCCTAGCCTTCCT -3') and a BAC clone DNA as a template.
