# Supplementary material
Source: PubMed Central journal article supplement (PMC3512143)
Supplement: e6120a78ae85baa2979cb75458aa3e79_genetics.112.145409-12.pdf [file e6120a78ae85baa2979cb75458aa3e79_genetics.112.145409-12.pdf]

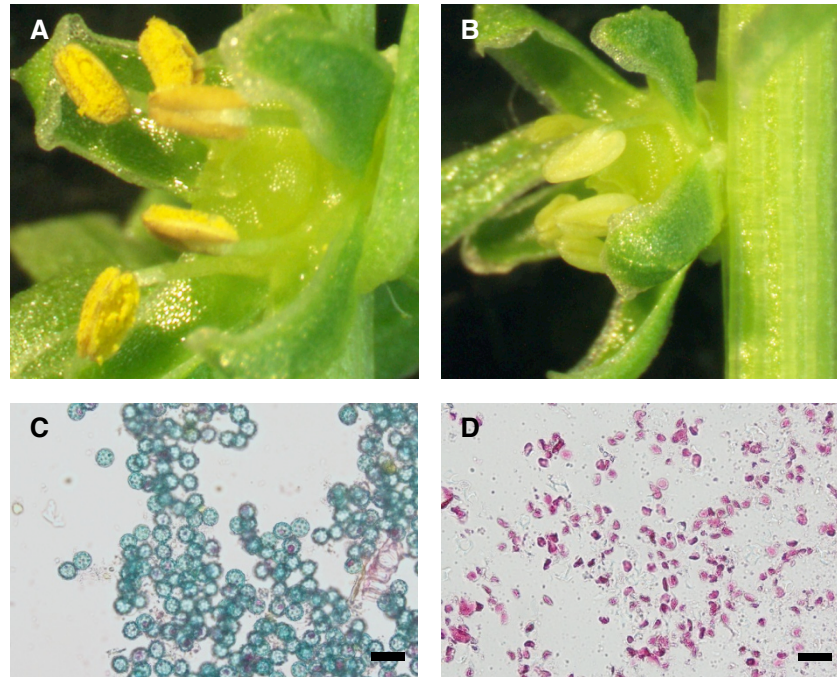

FIGURE S7.– Comparison of anther morphology and anther content between two sugar-beet plants derived from the 14 F1 plants. Panels A and C show photographs taken from a plant having the biaphos-resistance gene. Panels B and D show photographs taken from a plant missing the biaphos-resistance gene. A and B, anther morphology. C and D, images of Alexander's staining (scale bars; 20  $\mu$ m).
