# Supplementary material
Source: PubMed Central journal article supplement (PMC3512143)
Supplement: e84353cbda1d0de82c610e718e282c82_genetics.112.145409-15.pdf [file e84353cbda1d0de82c610e718e282c82_genetics.112.145409-15.pdf]

|        |                                                                        |     |
|--------|------------------------------------------------------------------------|-----|
| ORF18  | ATGGCGTGGTACAGAAATTC AAGGTTTGTCTACAATGCTTTAAAAC TCAACTTGC GTTCC        | 60  |
| ORF19  | ATGGCGTGGTACAGAAATTC AAGGTTTGTCTACAATGCTTTAAAAC TCAACTTGC GTTCC        | 60  |
| ORF20  | ATGGCGTGGTACAGAAATTC AAGGTTTGTCTACAATGCTTTAAAAC TCAACTTGC GTTCC        | 60  |
| ORF21  | ATGGCGTGGTACAGAAATTC AAGGTTTGTCTACAATGCTTTAAAAC TCAACTTGC GTTCC        | 60  |
| TK81-O | ATGGCGTGGTACAGAAATTC AAGGTTTGTCTACAATGCTTTAAAAC TCAACTTGC GTTCC        | 60  |
|        |                                                                        |     |
| ORF18  | AAAACATTTGGTACTATTC CAACTCCAAGAGTTCATT CGAATTCCTCATCTT TGTGTTTAC       | 120 |
| ORF19  | AAAACATTTGGTACTATTC CAACTCCAAGAGTTCATT CGAATTCCTCATCTT TGTGTTTAC       | 120 |
| ORF20  | AAAACATTTGGTACTATTC CAACTCCAAGAGTTCATT CGAATTCCTCATCTT TGTGTTTAC       | 120 |
| ORF21  | AAAACATTTGGTACTATTC CAACTCCAAGAGTTCATT CGAATTCCTCATCTT TGTGTTTAC       | 120 |
| TK81-O | AAAACATTTGGTACTATTC CAACTCCAAGAGTTCATT CGAATTCCTCATCTT TGTGTTTAC       | 120 |
|        |                                                                        |     |
| ORF18  | AATCAATCTACTAATAAGT GTAGTGGGTTATTTGGGT CTGCAAAATCTGGGTAT TTTAAT        | 180 |
| ORF19  | AATCAATCTACTAATAAGT GTAGTGGGTTATTTGGGT CTGCAAAATCTGGGTAT TTTAAT        | 180 |
| ORF20  | AATCAATCTACTAATAAGT GTAGTGGGTTATTTGGGT CTGCAAAATCTGGGTAT TTTAAT        | 180 |
| ORF21  | AATCAATCTACTAATAAGT GTAGTGGGTTATTTGGGT CTGCAAAATCTGGGTAT TTTAAT        | 180 |
| TK81-O | AATCAATCTACTAA---GT GTAGTGGGTTATTTGGGT CTGCAAAATCTGGGTAT TTTAAT        | 177 |
|        |                                                                        |     |
| ORF18  | GGGTTTAAACATCATCAAG AGATTAGCTCTTTCTCT GGGTTTTGCAAGGAGAA TTATCAT        | 240 |
| ORF19  | GGGTTTAAACATCATCAAG AGATTAGCTCTTTCTCT GGGTTTTGCAAGGAGAA TTATCAT        | 240 |
| ORF20  | GGGTTTAAACATCATCAAG AGATTAGCTCTTTCTCT GGGTTTTGCAAGGAGAA TTATCAT        | 240 |
| ORF21  | GGGTTTAAACATCATCAAG AGATTAGCTCTTTCTCT GGGTTTTGCAAGGAGAA TTATCAT        | 240 |
| TK81-O | GGGTTTAAACATCATCAAG AGATTAGCTCTTTCTCT GGGTTTTGCAAGGAGAA CTATCAT        | 237 |
|        |                                                                        |     |
| ORF18  | GGTGATAAAACCGAAGTAAG TGTGAATCATGGCTGGAA AAATTCCTTGTTCCAATT GGA         | 300 |
| ORF19  | GGTGATAAAACCGAAGTAAG TGTGAATCATGGCTGGAA AAATTTACTTCTTC---TT GCA        | 297 |
| ORF20  | GGTGATAAAACCGAAGTAAG TGTGAATCATGGCTGGAA AAATTCCTTGTTCCAATT GGA         | 300 |
| ORF21  | GGTGATAAAACCGAAGTAAG TGTGAATCATGGCTGGAA AAATTCCTTGTTCCAATT GGA         | 300 |
| TK81-O | GGTGATAAAACCGAAGTAAG TGTGAATTTCCGGTGGAA AAATTTACTTCTTGAATT GCA         | 297 |
|        |                                                                        |     |
| ORF18  | C-----TAATCTTGACTTT TGGTATACTTGGTTACCC TCATG <u>TGCACCCAGTAGTT</u>     | 351 |
| ORF19  | GTTGCAC---TAATCTTGA-----TTGCTTACCGTCATG <u>TGCACCCAGTAGTT</u>          | 342 |
| ORF20  | C-----TAATCTTGACTTT TGGTATACTTGGTTACCC TCATG <u>TGCACCCAGTAGTT</u>     | 351 |
| ORF21  | C-----TAATCTTGACTTT TGGTATACTTGGTTACCC TCATG <u>TGCACCCAGTAGTT</u>     | 351 |
| TK81-O | C-----TAATAATCTCGCAT TCTGGTATGATTGCTTTCT TTTATTT <u>TGCACCCAGTAGTT</u> | 351 |

|        |                                                                        |     |
|--------|------------------------------------------------------------------------|-----|
| ORF18  | <u>GTGCCA</u> TATACAGGAAGGAAGCATTATGTGCTTATGTCAACAACCTCGTGAGAATGAAATT  | 411 |
| ORF19  | <u>GTGCCA</u> TATACAGGAAGGAAGCATTATGTGCTTATGTCAACAACCTCGTGAGAATGAAAAAT | 402 |
| ORF20  | <u>GTGCCA</u> TATACAGGAAGGAAGCATTATGTGCTTATGTCAACAACCTCGTGAGAATGAAATT  | 411 |
| ORF21  | <u>GTGCCA</u> TATACAGGAAGGAAGCATTATGTGCTTATGTCAACAACCTCGTGAGAATGAAATT  | 411 |
| TK81-O | <u>GTGCCA</u> TATACAGGAAGGAAGCATTATGTGATTTTGTCAACAACCTCATGAGAATGAAAAAT | 411 |
|        | D-Fw                                                                   |     |
| ORF18  | GGAGAAGTTGAGAAGCGGAAAAATACAACCTGCTACACACCCCTGATACTGATAGGGTTAGG         | 471 |
| ORF19  | GGAGAAGTTGAGAAGCGGAAAAATACAACCTGCTACACACCCCTGATACTGAGAGGGTTAGG         | 462 |
| ORF20  | GGAGAAGTTGAGAAGCGGAAAAATACAACCTGCTACACACCCCTGATACTGATAGGGTTAGG         | 471 |
| ORF21  | GGAGAAGTTGAGAAGCGGAAAAATACAACCTGCTACACACCCCTGATACTGATAGGGTTAGG         | 471 |
| TK81-O | GGAGAATTGAGAAGCGGAAAAATACAACCTGCTACACACCCCTGATACTGAGAGGGTTAGG          | 471 |
| ORF18  | TCAATATTCCAACACATTCTTGAATCACTGGAAAGAGAGATTAATCACCATGAACTCGAA           | 531 |
| ORF19  | TCTATATTCCAACACATTATTGAATCACTGGAAAGAGAGATTAATCACCATGAACTCGAA           | 522 |
| ORF20  | TCAATATTCCAACACATTCTTGAATCACTGGAAAGAGAGATTAATCACCATGAACTCGAA           | 531 |
| ORF21  | TCAATATTCCAACACATTCTTGAATCACTGGAAAGAGAGATTAATCACCATGAACTCGAA           | 531 |
| TK81-O | TCTATATTCCAACACATTCTTGAATCACTGGAAAGAGAGATTAATCACCATGAACTCGAA           | 531 |
| ORF18  | CTCGAACTCGAA-----AGAGATGAAACTTTCAAGGAGAAAACCATTGGAAGGAGGAG             | 585 |
| ORF19  | CTCGAA-----AGAGATGAAACTTTCAAGGAGAAAACCATTGGAAGGAGGAG                   | 570 |
| ORF20  | CTCGAA-----AGAGATGAAACTTTCAAGGAGAAAACCATTGGAAGGAGGAG                   | 579 |
| ORF21  | CTCGAACTCGAA-----AGAGATGAAACTTTCAAGGAGAAAACCATTGGAAGGAGGAG             | 585 |
| TK81-O | CTCGAACTCGAACTCGAAAGAGATGAAACTTTCAAGGAGAAAACCATTGGAAGGAGGAG            | 591 |
| ORF18  | ACAGTTGATGATAAAGATAGTAGGAAGAAGCATAAGTGGGGCTAAGATAACTACTAACCAT          | 645 |
| ORF19  | ACAGTTGATGATAAAGATAGTAGGAAGAAGCATAAGTGGGGCTAAGATAACTACTAACCAT          | 630 |
| ORF20  | ACAGTTGATGATAAAGATAGTAGGAAGAAGCATAAGTGGGGCTAAGATAACTACTAACCAT          | 639 |
| ORF21  | ACAGTTGATGATAAAGATAGTAGGAAGAAGCATAAGTGGGGCTAAGATAACTACTAACCAT          | 645 |
| TK81-O | ACAGATCATGATAAAGATAGTAGGAAGAAGCATAAGTGGGGCTAAGATAACTACTAACCAT          | 651 |
| ORF18  | TTGGAAGGGATGAATTGGGAAATTTTCGTTGTTGATAAACCGTTGGTTGAGTCCAGTTAT           | 705 |
| ORF19  | TTGGAAGGGTTGAATTGGGAAATTTTCGTTGTTGATAAACCGTTGGTTGAGTCCAGTTGT           | 690 |
| ORF20  | TTGGAAGGGATGAATTGGGAAATTTTCGTTGTTGATAAACCGTTGGTTGAGTCCAGTTAT           | 699 |
| ORF21  | TTGGAAGGGATGAATTGGGAAATTTTCGTTGTTGATAAACCGTTGGTTGAGTCCAGTTAT           | 705 |
| TK81-O | ---GAAGGGATGAATTGGGAAATTTTCGTTGTCGATAAACCGTTGGTTGAGTCCAGTTGT           | 708 |

ORF18 TTATTAGGTGGGAAGATTGTTGTTTACACCGGATTGCTCAACCATT-GCAACTCTGATG 763  
 ORF19 TTATTTGATGGGAAGATTGTTGTTTACACCGGATTGCTCAACCATTT-CAACTCTGATG 748  
 ORF20 TTATTAGGTGGGAAGATTGTTGTTTACACCGGATTGCTCAACCATT-GCAACTCTGATG 757  
 ORF21 TTATTAGGTGGGAAGATTGTTGTTTACACCGGATTGCTCAACCATT-GCAACTCTGATG 763  
 TK81-0 ATATTTGGTGGGAAGATTGTTGTTTACACTGGATTGCTCAACCATTTG-ATCTCTGATG 766

Intron 1

ORF18 CTGAATTGGCTACAATTATCGCGCATCAGGTTGGGCATGCTGTGGCTCGACATGAGGCAG 823  
 ORF19 CTGAATTGGCTACAATTATCGCGCATCAGGTTGGGCATGCTGTGGCTCGACATGAGGCAG 808  
 ORF20 CTGAATTGGCTACAATTATCGCGCATCAGGTTGGGCATGCTGTGGCTCGACATGAGGCAG 817  
 ORF21 CTGAATTGGCTACAATTATCGCGCATCAGGTTGGGCATGCTGTGGCTCGACATGAGGCAG 823  
 TK81-0 CTGAATTGGCTACAATTATCGCGCATCAGGTTGGGCATGCTGTGGCTCGACATGAGGCAG 826

Gre

ORF18 AGGATTGCAGACGATTTTCTGGTTGTTAATA---TCCCTCAACGTGATATTATTTAAAA 880  
 ORF19 AGCATTGGACAGCATTGTTCTGGTGGTCAATGTTAGGGTTCACGTGACATTATTTGAAA 868  
 ORF20 AGGATTGCAGACGATTTTCTGGTTGTTAATA---TCCCTCAACGTGATATTATTTAAAA 874  
 ORF21 AGGATTGCAGACGATTTTCTGGTTGTTAATA---TCCCTCAACGTGATATTATTTAAAA 880  
 TK81-0 AGCATTGGACAACATTGTTGTGGTCGATACTGTTAGTGATATACATGACAATATTTCAAT 886

ORF18 TTCTATTTACTGAGCCTGAATCTGCCAATGCAAGATCAAACACTACTCTTAAGGCATCCTC 940  
 ORF19 TTCTATTTACTGCGCCTGAATTTGCCAATGCAAGATCAAACACTACTCTTAAGGCATCCTC 928  
 ORF20 TTCTATTTACTGAGCCTGAATCTGCCAATGCAAGATCAAACACTACTCTTAAGGCATCCTC 934  
 ORF21 TTCTATTTACTGAGCCTGAATCTGCCAATGCAAGATCAAACACTACTCTTAAGGCATCCTC 940  
 TK81-0 ATCTATTTACTGCGCCTGAATTTGCCAATGCAATATCAAACACTACTCTCAAGGCATCCTC 946

Intron 2

ORF18 TCTTGCAAAAAGTTTGGGAAGATTATTCAGGCTAGAGCTCCACAATTACTGCCACGAACTA 1000  
 ORF19 TCTTGCAAAAAGTTTGGGAAGATTATTCAGGCTAGATTTCATCAATTACTGCCACGAACTA 988  
 ORF20 TCTTGCAAAAAGTTTGGGAAGATTATTCAGGCTAGAGCTCCACAATTACTGCCACGAACTA 994  
 ORF21 TCTTGCAAAAAGTTTGGGAAGATTATTCAGGCTAGAGCTCCACAATTACTGCCACGAACTA 1000  
 TK81-0 TCTTGCAAAAAGTTTGGGAAGATTATTCAGGCTAGATTTCATCAATTACTGCCACGAACTA 1006

D-Rv

ORF18 TCT---GCTTGTCCTTGTGGATTGTTTCCCTCGGTGTTTATTCTTTATTATGGTCGGA 1057  
 ORF19 CCTTGCATTTGGGCTTTGTTGGATTGTCTTCCCTGGTGTATTCTTTATTTTGGTCGGA 1048  
 ORF20 TCT---GCTTGTCCTTGTGGATTGTTTCCCTCGGTGTTTATTCTTTATTATGGTCGGA 1051  
 ORF21 TCT---GCTTGTCCTTGTGGATTGTTTCCCTCGGTGTTTATTCTTTATTATGGTCGGA 1057  
 TK81-0 CCTTGCACCTTGGGCTTTCTTGGATTGTCTTCCCTGGTGTATTCTTTATTTTGGTCGGA 1066

```

ORF18      AGGAAATAGAAGCAGATCACATTGGAGTGCTTCTGATGGCTTCTGCTGGATACGACCCGC 1117
ORF19      AGGAAATAGAAGCAGATCACATTGGAGTGCTTCTGATGGCTTCTGCTGGATACGACCCGC 1108
ORF20      AGGAAATAGAAGCAGATCACATTGGAGTGCTTCTGATGGCTTCTGCTGGATACGACCCGC 1111
ORF21      AGGAAATAGAAGCAGATCACATTGGAGTGCTTCTGATGGCTTCTGCTGGATACGACCCGC 1117
TK81-O     AGGAAATAGAAGCAGATCACATTGGAGTGCTTCTGATGGCTTCTGCTGGATACGACCCGC 1126

ORF18      GAGTTGCACCTCAAGTATATGACAAGCTTGCAAAGCCACTGGGCGACTGGAAGTGTTTAG 1177
ORF19      GAGTTGCACCTCAAGTATATGACAAGCTTGCAAAGCCACTGGGCGACTGGAAGTGTTTAG 1168
ORF20      GAGTTGCACCTCAAGTATATGACAAGCTTGCAAAGCCACTGGGCGACTGGAAGTGTTTAG 1171
ORF21      GAGTTGCACCTCAAGTATATGACAAGCTTGCAAAGCCACTGGGCGACTGGAAGTGTTTAG 1177
TK81-O     GAGTTGCACCTCAAGTATATGACAAGCTTGCAAAGCCACTGGGCGACTGGAAGTGTTTAG 1186

ORF18      CAACTCATCCATTTGCAAGAATGAGAGCAAAGTTGTTAGCTCGAGCTGATGTTATGAAGG 1237
ORF19      CAACTCATCCATTTGCAAGAATGAGAGCAAAGTTGTTAGCTCGAGCTGATGTTATGAAGG 1228
ORF20      CAACTCATCCATTTGCAAGAATGAGAGCAAAGTTGTTAGCTCGAGCTGATGTTATGAAGG 1231
ORF21      CAACTCATCCATTTGCAAGAATGAGAGCAAAGTTGTTAGCTCGAGCTGATGTTATGAAGG 1237
TK81-O     CAACTCATCCATTTGCAAGAATGAGAGCAAAGTTGTTAGCTCGAGCTGATGTTATGAAGG 1246

ORF18      AAGCAGATAAGATATACAATGAAGTTGTAGCAGGACGTGCAATTCAAGGTCTTCAGTAA 1296
ORF19      AAGCAGATAAGATATACAATGAAGTTGTAGCAGGACGTGCAATTCAAGGTCTTCAGTAA 1287
ORF20      AAGCAGATAAGATATACAATGAAGTTGTAGCAGGACGTGCAATTCAAGGTCTTCAGTAA 1290
ORF21      AAGCAGATAAGATATACAATGAAGTTGTAGCAGGACGTGCAATTCAAGGTCTTCAGTAA 1296
TK81-O     AAGCAGATAAGATATACAATGAAGTTGTAGCAGGACGTGCAATTCAAGGTCTTCAGTAA 1305

```

FIGURE S5.– Sequence alignment of *bvORF18* (ORF18), *bvORF19* (ORF19), *bvORF20* (ORF20), *bvORF21* (ORF21), and *bvORF20L* (TK81-O). Hyphens indicate gaps inserted for maximum matching. Residues of nucleotide sequences are numbered from the translational initiation codon. Positions of introns are shown with black triangles, but the intronic sequences are not shown. Exon/intron boundaries have been experimentally confirmed (H. Matsuhira, T. Mikami and T. Kubo, manuscript in preparation). Primer sequences are underlined. Nucleotide residues corresponding to Site 1 and Site 2 in Figure 4 are shown by red and blue letters, respectively. 5'-CTCGAA-3' repeated sequences are indicated by purple letters.
