# Supplementary material
Source: PubMed Central journal article supplement (PMC3512143)
Supplement: f6cdfcae5bee0fa320fcb7e5a47d4d55_genetics.112.145409-4.pdf [file f6cdfcae5bee0fa320fcb7e5a47d4d55_genetics.112.145409-4.pdf]

| Name of ORFs      | Condition of amplification |           | Nucleotide sequences of primers | NK198   |   |        |   |       |   | C | Size of PCR products (bp) |
|-------------------|----------------------------|-----------|---------------------------------|---------|---|--------|---|-------|---|---|---------------------------|
|                   | Annealing (°C)             | Extension |                                 | Anthers |   | Leaves |   | Roots |   |   |                           |
|                   |                            |           |                                 | +       | - | +      | - | +     | - |   |                           |
| bvORF12           | 60                         | 1:00      | 5'-CTGATTTTGGACGGAGCTTGTTTCG-3' |         |   |        |   |       |   | / | 630                       |
|                   |                            |           | 5'-TGCATTGTAGAAACACCCGCGTAG-3'  |         |   |        |   |       |   |   |                           |
| bvORF13           | 62                         | 1:30      | 5'-CCAGGGACAGGGAAGACCAAGAC-3'   |         |   |        |   |       |   | / | 1100                      |
|                   |                            |           | 5'-AGTCCTCCTTTCCACCCGACAC-3'    |         |   |        |   |       |   |   |                           |
| bvORF14           | 56                         | 0:30      | 5'-ATCTCCACTTGAAGGGCCAG-3'      |         |   |        |   |       |   | / | 250                       |
|                   |                            |           | 5'-TTCTCGTCAGACGGACTGAG-3'      |         |   |        |   |       |   |   |                           |
| bvORF15           | 56                         | 0:30      | 5'-AGTTACCGTGGAGTTACTAGC-3'     |         |   |        |   |       |   | / | 300                       |
|                   |                            |           | 5'-AGCACAGACTCGTTGCCACT-3'      |         |   |        |   |       |   |   |                           |
| bvORF16           | 52                         | 0:30      | 5'-AACATCTCCCTAGCCTTCCT-3'      |         |   |        |   |       |   | / | 870                       |
|                   |                            |           | 5'-CTGAATTCGTTTGCGTATAGT-3'     |         |   |        |   |       |   |   |                           |
| bvORF17           | 56                         | 1:00      | 5'-CAAGACTTGGTTCAATCAGCC-3'     |         |   |        |   |       |   | / | 550                       |
|                   |                            |           | 5'-TTCTTTCTCGGCTTCAGCAGC-3'     |         |   |        |   |       |   |   |                           |
| bvORF18 /19/20/21 | 56                         | 0:30      | 5'-AAGGCATCCTCTCTTGCAAAA-3'     |         |   |        |   |       |   | / | 360                       |
|                   |                            |           | 5'-TGAATTGCACGTCCTGCTACA-3'     |         |   |        |   |       |   |   |                           |
| bvORF22           | 62                         | 1:30      | 5'-GTGGCTCTCTCTAAACCGGCTTGT-3'  |         |   |        |   |       |   | / | 1400                      |
|                   |                            |           | 5'-CATGTTTCAGCCCGACCCACGAA-3'   |         |   |        |   |       |   |   |                           |
| bvORF23           | 53                         | 0:30      | 5'-CTATTGCGTGATCTTTGTGTTAGAA-3' |         |   |        |   |       |   | / | 410                       |
|                   |                            |           | 3'                              |         |   |        |   |       |   |   |                           |
| bvORF24           | 56                         | 0:30      | 5'-TCGAATCTAACGCGGAGACA-3'      |         |   |        |   |       |   | / | 230                       |
|                   |                            |           | 5'-TGCAGAGGGAGTCAAGTCAG-3'      |         |   |        |   |       |   |   |                           |
| bvORF25           | 54                         | 0:30      | 5'-ACAGGATTCGCTGGCCTTAA-3'      |         |   |        |   |       |   | / | 240                       |
|                   |                            |           | 5'-TCAAAATTGGTCCTCACCAC-3'      |         |   |        |   |       |   |   |                           |

| Name of ORFs | Condition of amplification |           | Nucleotide sequences of primers | NK198   |   |        |   |       |   |   | Size of PCR products (bp) |
|--------------|----------------------------|-----------|---------------------------------|---------|---|--------|---|-------|---|---|---------------------------|
|              | Annealing (°C)             | Extension |                                 | Anthers |   | Leaves |   | Roots |   | C |                           |
|              |                            |           |                                 | +       | - | +      | - | +     | - |   |                           |
| bvORF26      | 56                         | 1:30      | 5'-GATGGAAGGTACATGCACAC-3'      |         |   |        |   |       |   |   | 100                       |
|              |                            |           | 5'-CAATGCCACGCCAACTTTCC-3'      |         |   |        |   |       |   |   |                           |
| bvORF27      | 56                         | 0:30      | 5'-AAGCGTCAGATCCTTAACCC-3'      |         |   |        |   |       |   |   | 260                       |
|              |                            |           | 5'-ACTATTGAGGAACTCTGCTGC-3'     |         |   |        |   |       |   |   |                           |
| bvORF28      | 52                         | 0:30      | 5'-CACCAATTTTAGGGGCTCTA-3'      |         |   |        |   |       |   |   | 120                       |
|              |                            |           | 5'-AAAAATCCAATCCAATAAGTCC-3'    |         |   |        |   |       |   |   |                           |
| bvORF29      | 56                         | 0:30      | 5'-TTCTCGAACCATATCCCACC-3'      |         |   |        |   |       |   |   | 150                       |
|              |                            |           | 5'-TGTGAAAGTCGAGAGCTAAGG-3'     |         |   |        |   |       |   |   |                           |
| bvORF30      | 56                         | 0:30      | 5'-ATATTAACCCACGGTCCGG-3'       |         |   |        |   |       |   |   | 430                       |
|              |                            |           | 5'-ATGAGACAGTCGTCCCATAG-3'      |         |   |        |   |       |   |   |                           |
| bvORF31      | 54                         | 1:00      | 5'-GGATCATACCTGAAGAGTGT-3'      |         |   |        |   |       |   |   | 570                       |
|              |                            |           | 5'-TAAGAAGACCATGCTCTTCC-3'      |         |   |        |   |       |   |   |                           |
| bvORF32      | 56                         | 0:30      | 5'-TTGAACTTCTAGACCTGGAGT-3'     |         |   |        |   |       |   |   | 500                       |
|              |                            |           | 5'-CACCGAGCTTCTTAAGTAGCATGT-3'  |         |   |        |   |       |   |   |                           |
| bvORF33      | 56                         | 0:30      | 5'-ACACTTCTTAGGGTGACGAAG-3'     |         |   |        |   |       |   |   | 170                       |
|              |                            |           | 5'-TGTTGAAGCAGTGTGGGGTG-3'      |         |   |        |   |       |   |   |                           |
| bvORF34      | 56                         | 1:00      | 5'-TGGCAAAGGGGTTTTGACAC-3'      |         |   |        |   |       |   |   | 560                       |
|              |                            |           | 5'-GCAATTCCAGGATCAACATAGCAC-3'  |         |   |        |   |       |   |   |                           |
| bvORF35      | 54                         | 0:30      | 5'-TCTGATGTATCCACATCATCG-3'     |         |   |        |   |       |   |   | 230                       |
|              |                            |           | 5'-ATTAGATGCATCACGGTCTGG-3'     |         |   |        |   |       |   |   |                           |

FIGURE S1.– RT-PCR analysis of 21 bvORFs. Names of target ORFs, annealing temperatures, extension times, nucleotide sequences of primers, and sizes of PCR products are shown. RNA samples were subjected to reverse transcription with (+) or without (-) reverse transcriptase. Integrity of the PCR reaction was confirmed by control experiments using genomic DNA as templates (C).
